# Supplementary material for: Iodine promoted cyclization of N,N′-diphenylthiocarbamides with enaminones: a protocol for the synthesis of poly-substituted 2-iminothiazolines
Source: Royal Society of Chemistry journal article supplement (doi:10.1039/d2ob01477g), 2022-01-01

## Supporting Information

### **Iodine promoted cyclization of *N,N'*-diphenylthiocarbamides with enaminones : a protocol for the synthesis of poly-substituted 2-iminothiazolines**

Xiao-Hu Xu,<sup>a</sup> Zhi-Bing Dong\*<sup>a,b,c</sup>

<sup>a</sup>School of Chemistry and Environmental Engineering, Wuhan Institute of Technology, Wuhan 430205, China.

<sup>b</sup>School of Chemistry and Chemical Engineering, Henan Normal University, Xinxiang 453007, China.

<sup>c</sup>Key Laboratory of Green Chemical Process, Ministry of Education, Wuhan Institute of Technology, Wuhan 430205, China

Email: [dz04982@wit.edu.cn](mailto:dz04982@wit.edu.cn)

## Table of Contents

|                                                                              |    |
|------------------------------------------------------------------------------|----|
| 1. General information .....                                                 | 3  |
| 2. Scope of the Cyclization Affording 2-Iminothiazoline.....                 | 3  |
| 2.1. General Procedure for the Synthesis of <b>3a</b> .....                  | 3  |
| 2.2. Characterization of <b>3</b> .....                                      | 5  |
| 3. Control Experiments .....                                                 | 25 |
| 3.1. Reaction with Radical Trapping Agent TEMPO .....                        | 25 |
| 3.2. Reaction with 7-Methoxy-4H-Chromen-4-One .....                          | 25 |
| 3.3. Reaction with Chalcone .....                                            | 26 |
| 4. Crystallographic Data of Compound <b>3a</b> .....                         | 27 |
| 5. <sup>1</sup> H NMR and <sup>13</sup> C NMR Spectra of <b>3a-3ah</b> ..... | 29 |

## 1. General information

All starting materials were purchased from commercial suppliers and used without further purification unless otherwise stated. Yields refer to isolated compounds estimated to be >95% pure as determined by  $^1\text{H}$  NMR and capillary GC analysis. NMR spectra were recorded on a Bruker AM400 NMR instrument in  $\text{CDCl}_3$  or  $\text{DMSO-}d_6$  using TMS as an internal standard. Chemical shifts are given in ppm, and coupling constants (J) are given in Hz. Infrared spectra (IR) were recorded from  $4000\text{ cm}^{-1}$  to  $400\text{ cm}^{-1}$  on a Thermo Fisher Scientific spectrum Nicolet IS50 FT-IR instrument. The main absorption peaks are reported in  $\text{cm}^{-1}$ . High-resolution mass spectra (HRMS) were recorded on a Agilent 1290 HPLC-6545B Q-TOF mass instrument (ESI). All melting points were determined on a RY-1G melting point instrument without correction. TLC was performed using aluminum plates coated with  $\text{SiO}_2$  (Merck 60, F-254) and visualized with UV light at 254 nm. Column chromatography was performed on silica gel (200–300 mesh) with PE (petroleum ether)/EtOAc (ethyl acetate) as eluent.

## 2. Scope of the [3 + 2] Cyclization Affording 2-Iminothiazoline

### 2.1. General Procedure for the Synthesis of 3a

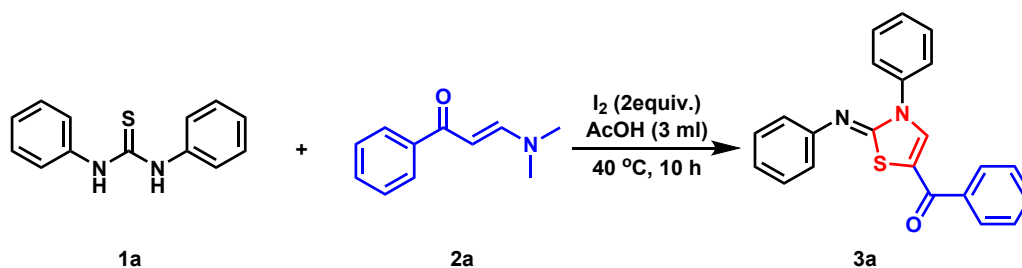

A mixture of *N,N'*-diphenylthiocarbamide **1a** (0.5 mmol, 0.114 g, 1 equiv.), enaminone **2a** (0.6 mmol, 0.105 g, 1.2 equiv.) and  $\text{I}_2$  (1 mmol, 0.254 g, 2 equiv.) in AcOH (3.0 mL) was stirred and warmed at  $40\text{ }^\circ\text{C}$  using a heating mantle for 10 h, and the reaction was monitored by TLC until the starting material was consumed. The reaction was quenched with sat.  $\text{Na}_2\text{S}_2\text{O}_3$  solution (3 mL) and then extracted with ethyl acetate. The crude solution was dried over anhydrous  $\text{Na}_2\text{SO}_4$  and evaporated under a vacuum. The residue

was purified by flash column chromatography to afford the desired product **3a** as a yellow solid (167.2 mg, 94% yield).

## 2.2. Characterization of **3**

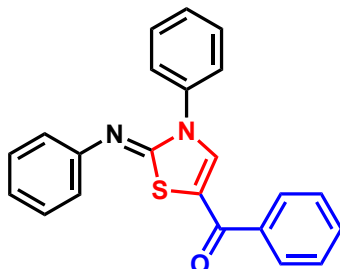

*(Z)*-phenyl(3-phenyl-2-(phenylimino)-2,3-dihydrothiazol-5-yl)methanone (**3a**).

According to the general procedure, the residue was purified by flash chromatography on silica gel (petroleum ether/ethyl acetate = 10:1) to give the target compound **3a** as a yellow solid (167.2 mg, 94% yield). mp: 164–166 °C. <sup>1</sup>H NMR (400 MHz, CDCl<sub>3</sub>) δ 7.64 (d, *J* = 7.4 Hz, 2H), 7.49–7.36 (m, 8H), 7.32–7.24 (m, 3H), 7.01 (t, *J* = 7.4 Hz, 1H), 6.96 (d, *J* = 7.8 Hz, 2H). <sup>13</sup>C NMR (100 MHz, CDCl<sub>3</sub>) δ 184.8, 155.6, 149.4, 137.5, 136.6, 136.4, 131.1, 128.6, 128.5, 127.7, 127.4, 127.2, 124.7, 123.2, 119.9, 116.8. IR (Diamond-ATR, neat):  $\nu$  / cm<sup>-1</sup> = 3064, 2925, 1621, 1587, 1567, 1494, 1447, 1383, 1287, 1235, 1204, 1178, 1134, 1099, 1069, 890, 825, 767, 710, 697, 683, 663, 628, 603, 528. HRMS (ESI) *m/z* [M + H]<sup>+</sup> Calcd for C<sub>22</sub>H<sub>17</sub>N<sub>2</sub>OS<sup>+</sup> 357.1056; Found 357.1062.

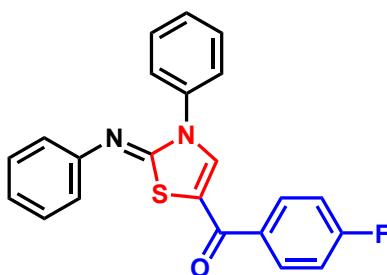

*(Z)*-(4-fluorophenyl)(3-phenyl-2-(phenylimino)-2,3-dihydrothiazol-5-yl)methanone

**(3b)**. According to the general procedure, the residue was purified by flash chromatography on silica gel (petroleum ether/ethyl acetate = 10:1) to give the target compound **3b** as a yellow oil (182.7 mg, 98% yield). <sup>1</sup>H NMR (400 MHz, CDCl<sub>3</sub>) δ 7.61–7.58 (m, 2H), 7.41 (d, *J* = 8.0 Hz, 2H), 7.34–7.30 (m, 3H), 7.25–7.17 (m, 3H), 6.99–6.93 (m, 3H), 6.90 (d, *J* = 7.5 Hz, 2H). <sup>13</sup>C NMR (100 MHz, CDCl<sub>3</sub>) δ 183.1,

164.0 (d,  $J_{C-F} = 251.9$  Hz), 155.3, 149.3, 137.3, 136.3, 132.7 (d,  $J_{C-F} = 2.9$  Hz), 129.6 (d,  $J_{C-F} = 9.1$  Hz), 128.5, 128.4, 127.4, 124.6, 123.2, 119.8, 116.4, 114.8 (d,  $J_{C-F} = 21.5$  Hz). IR (Diamond-ATR, neat):  $\nu / \text{cm}^{-1} = 2918, 2850, 1617, 1570, 1493, 1382, 1297, 1270, 1229, 1201, 1155, 1095, 889, 848, 764, 752, 695, 589, 541$ . HRMS (ESI)  $m/z$  [ $M + H$ ]<sup>+</sup> Calcd for  $\text{C}_{22}\text{H}_{16}\text{FN}_2\text{OS}^+$  375.0962; Found 375.0969.

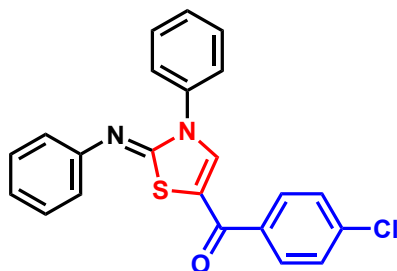

*(Z)*-(4-chlorophenyl)(3-phenyl-2-(phenylimino)-2,3-dihydrothiazol-5-yl)methanone (**3c**). According to the general procedure, the residue was purified by flash chromatography on silica gel (petroleum ether/ethyl acetate = 10:1) to give the target compound **3c** as a yellow solid (172.2 mg, 88% yield). mp: 162–164 °C. <sup>1</sup>H NMR (400 MHz,  $\text{CDCl}_3$ )  $\delta$  7.55 (d,  $J = 8.5$  Hz, 2H), 7.44 (d,  $J = 7.9$  Hz, 2H), 7.39–7.35 (m, 3H), 7.33–7.28 (m, 3H), 7.24 (t,  $J = 7.9$  Hz, 2H), 6.99 (t,  $J = 7.4$  Hz, 1H), 6.93 (d,  $J = 7.5$  Hz, 2H). <sup>13</sup>C NMR (100 MHz,  $\text{CDCl}_3$ )  $\delta$  183.3, 155.3, 149.3, 137.5, 137.4, 136.3, 134.8, 128.6, 128.6, 128.5, 128.0, 127.5, 124.7, 123.2, 119.8, 116.5. IR (Diamond-ATR, neat):  $\nu / \text{cm}^{-1} = 3073, 1628, 1586, 1572, 1557, 1490, 1383, 1320, 1292, 1265, 1242, 1200, 1176, 1139, 1093, 1015, 889, 849, 824, 772, 749, 724, 699, 633, 561, 528, 492, 469$ . HRMS (ESI)  $m/z$  [ $M + H$ ]<sup>+</sup> Calcd for  $\text{C}_{22}\text{H}_{16}\text{ClN}_2\text{OS}^+$  391.0666; Found 391.0676.

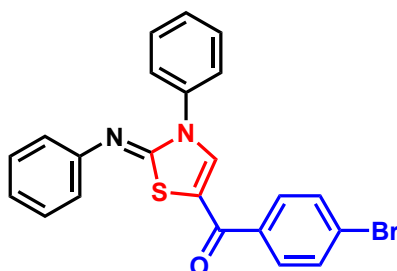

*(Z)*-(4-bromophenyl)(3-phenyl-2-(phenylimino)-2,3-dihydrothiazol-5-yl)methanone (**3d**). According to the general procedure, the residue was purified by flash chromatography on silica gel (petroleum ether/ethyl acetate = 10:1) to give the target compound **3d** as a yellow oil (201.4 mg, 93% yield). <sup>1</sup>H NMR (400 MHz,  $\text{CDCl}_3$ )  $\delta$

7.56–7.52 (m, 6H), 7.48–7.44 (m, 3H), 7.39–7.31 (m, 3H), 7.08 (t,  $J = 7.4$  Hz, 1H), 7.02 (d,  $J = 7.7$  Hz, 2H).  $^{13}\text{C}$  NMR (100 MHz,  $\text{CDCl}_3$ )  $\delta$  184.5, 156.3, 150.2, 138.6, 137.1, 136.2, 131.9, 129.7, 129.6, 129.4, 128.5, 126.9, 125.6, 124.2, 120.8, 117.4. IR (Diamond-ATR, neat):  $\nu / \text{cm}^{-1} = 3073, 2918, 1625, 1571, 1556, 1490, 1397, 1381, 1320, 1264, 1242, 1200, 1176, 1139, 1070, 1011, 889, 846, 831, 772, 762, 747, 733, 697, 630, 526, 491$ . HRMS (ESI)  $m/z$   $[\text{M} + \text{H}]^+$  Calcd for  $\text{C}_{22}\text{H}_{16}\text{BrN}_2\text{OS}^+$  435.0161; Found 435.0157.

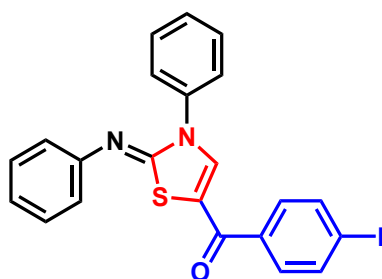

*(Z)*-(4-iodophenyl)(3-phenyl-2-(phenylimino)-2,3-dihydrothiazol-5-yl)methanone (**3e**).

According to the general procedure, the residue was purified by flash chromatography on silica gel (petroleum ether/ethyl acetate = 10:1) to give the target compound **3e** as a yellow solid (183.9 mg, 76% yield). mp: 186–188 °C.  $^1\text{H}$  NMR (400 MHz,  $\text{CDCl}_3$ )  $\delta$  7.78 (d,  $J = 8.4$  Hz, 2H), 7.53 (d,  $J = 8.0$  Hz, 2H), 7.47–7.31 (m, 8H), 7.08 (t,  $J = 7.4$  Hz, 1H), 7.02 (d,  $J = 7.5$  Hz, 2H).  $^{13}\text{C}$  NMR (100 MHz,  $\text{CDCl}_3$ )  $\delta$  184.8, 156.3, 150.3, 138.7, 138.0, 137.3, 136.9, 129.7, 129.7, 129.5, 128.6, 125.8, 124.3, 120.9, 117.5, 99.4. IR (Diamond-ATR, neat):  $\nu / \text{cm}^{-1} = 3068, 1625, 1585, 1568, 1490, 1378, 1321, 1264, 1244, 1200, 1176, 1139, 1008, 888, 816, 772, 761, 745, 732, 697, 630, 525$ . HRMS (ESI)  $m/z$   $[\text{M} + \text{H}]^+$  Calcd for  $\text{C}_{22}\text{H}_{16}\text{IN}_2\text{OS}^+$  483.0023; Found 483.0015.

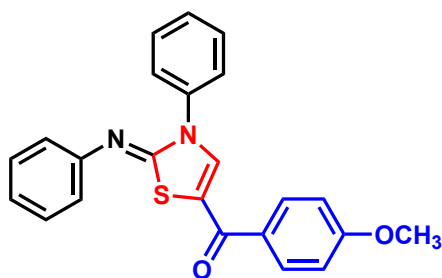

*(Z)*-(4-methoxyphenyl)(3-phenyl-2-(phenylimino)-2,3-dihydrothiazol-5-yl)methanone

(**3f**). According to the general procedure, the residue was purified by flash chromatography on silica gel (petroleum ether/ethyl acetate = 10:1) to give the target

compound **3f** as a white solid (158.8 mg, 82% yield). mp: 170–172 °C. <sup>1</sup>H NMR (400 MHz, CDCl<sub>3</sub>) δ 7.74 (d, *J* = 8.7 Hz, 2H), 7.57 (d, *J* = 7.9 Hz, 2H), 7.50–7.46 (m, 3H), 7.40–7.32 (m, 3H), 7.10–7.03 (m, 3H), 6.94 (d, *J* = 8.7 Hz, 2H), 3.83 (s, 3H). <sup>13</sup>C NMR (100 MHz, CDCl<sub>3</sub>) δ 184.5, 162.9, 156.6, 150.5, 137.5, 137.5, 130.4, 130.2, 129.5, 129.4, 128.3, 125.7, 124.1, 121.0, 117.8, 114.0, 55.5. IR (Diamond-ATR, neat):  $\nu$  / cm<sup>-1</sup> = 3073, 2919, 1616, 1584, 1492, 1370, 1324, 1255, 1199, 1167, 1138, 1095, 1032, 891, 838, 771, 756, 726, 698, 593, 496. HRMS (ESI) *m/z* [M + H]<sup>+</sup> Calcd for C<sub>23</sub>H<sub>19</sub>N<sub>2</sub>O<sub>2</sub>S<sup>+</sup> 387.1162; Found 387.1175.

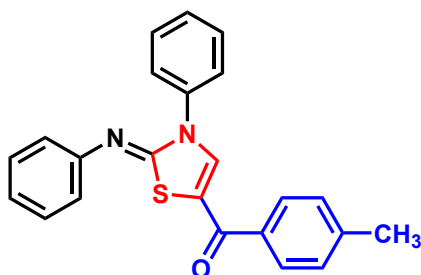

*(Z)*-(3-phenyl-2-(phenylimino)-2,3-dihydrothiazol-5-yl)(*p*-tolyl)methanone (**3g**).

According to the general procedure, the residue was purified by flash chromatography on silica gel (petroleum ether/ethyl acetate = 10:1) to give the target compound **3g** as a white solid (169.6 mg, 92% yield). mp: 158–160 °C. <sup>1</sup>H NMR (400 MHz, CDCl<sub>3</sub>) δ 7.63 (d, *J* = 7.6 Hz, 2H), 7.55 (d, *J* = 7.6 Hz, 2H), 7.48–7.45 (m, 3H), 7.38–7.31 (m, 3H), 7.25 (d, *J* = 7.6 Hz, 2H), 7.09–7.03 (m, 3H), 2.39 (s, 3H). <sup>13</sup>C NMR (100 MHz, CDCl<sub>3</sub>) δ 185.5, 156.6, 150.5, 142.8, 138.1, 137.5, 134.9, 129.5, 129.4, 129.4, 128.3, 128.3, 125.7, 124.1, 120.9, 117.9, 21.6. IR (Diamond-ATR, neat):  $\nu$  / cm<sup>-1</sup> = 3078, 1622, 1575, 1490, 1376, 1321, 1263, 1243, 1199, 1184, 1139, 1092, 890, 834, 771, 745, 731, 697, 592, 468. HRMS (ESI) *m/z* [M + H]<sup>+</sup> Calcd for C<sub>23</sub>H<sub>19</sub>N<sub>2</sub>OS<sup>+</sup> 371.1213; Found 371.1202.

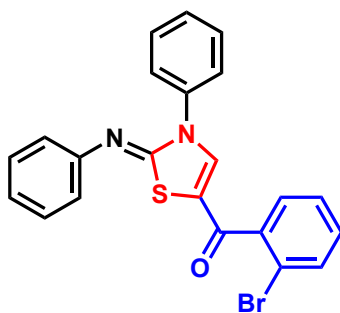

(*Z*)-(2-bromophenyl)(3-phenyl-2-(phenylimino)-2,3-dihydrothiazol-5-yl)methanone (**3h**). According to the general procedure, the residue was purified by flash chromatography on silica gel (petroleum ether/ethyl acetate = 10:1) to give the target compound **3h** as a yellow oil (117.3 mg, 54% yield). <sup>1</sup>H NMR (400 MHz, CDCl<sub>3</sub>) δ 7.50 (d, *J* = 7.8 Hz, 1H), 7.39 (d, *J* = 7.7 Hz, 2H), 7.33 (t, *J* = 7.7 Hz, 2H), 7.26–7.16 (m, 6H), 7.10 (s, 1H), 6.99 (t, *J* = 7.4 Hz, 1H), 6.94 (d, *J* = 7.5 Hz, 2H). <sup>13</sup>C NMR (100 MHz, CDCl<sub>3</sub>) δ 184.0, 155.4, 149.1, 139.0, 138.2, 136.1, 132.5, 130.5, 128.5, 128.4, 127.7, 127.5, 126.3, 124.7, 123.3, 119.8, 118.6, 116.5. IR (Diamond-ATR, neat):  $\nu / \text{cm}^{-1}$  = 2919, 1618, 1585, 1492, 1382, 1307, 1268, 1225, 1200, 1145, 1025, 888, 825, 761, 740, 696, 617, 532. HRMS (ESI)  $m/z$  [M + H]<sup>+</sup> Calcd for C<sub>22</sub>H<sub>16</sub>BrN<sub>2</sub>OS<sup>+</sup> 435.0161; Found 435.0175.

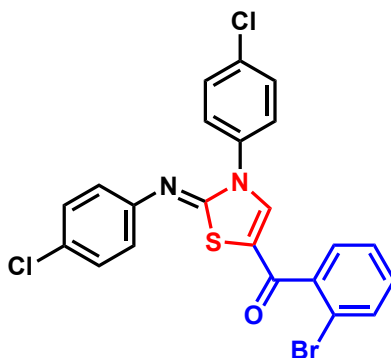

(*Z*)-(2-bromophenyl)(3-(4-chlorophenyl)-2-((4-chlorophenyl)imino)-2,3-dihydrothiazol-5-yl)methanone (**3i**). According to the general procedure, the residue was purified by flash chromatography on silica gel (petroleum ether/ethyl acetate = 10:1) to give the target compound **3i** as a yellow oil (112.4 mg, 45% yield). <sup>1</sup>H NMR (400 MHz, CDCl<sub>3</sub>) δ 7.53 (d, *J* = 7.8 Hz, 1H), 7.36–7.28 (m, 6H), 7.25–7.19 (m, 3H), 7.09 (s, 1H), 6.87 (d, *J* = 8.6 Hz, 2H). <sup>13</sup>C NMR (100 MHz, CDCl<sub>3</sub>) δ 184.0, 155.6, 147.3, 138.1, 138.0, 134.4, 133.4, 132.6, 130.6, 128.6, 128.6, 128.4, 127.7, 126.4, 126.1, 121.2, 118.6, 117.0. IR (Diamond-ATR, neat):  $\nu / \text{cm}^{-1}$  = 2918, 2849, 1617, 1572, 1485, 1383, 1307, 1283, 1228, 1200, 1146, 1089, 1015, 893, 837, 770, 741, 672, 639, 475. HRMS (ESI)  $m/z$  [M + H]<sup>+</sup> Calcd for C<sub>22</sub>H<sub>14</sub>BrCl<sub>2</sub>N<sub>2</sub>OS<sup>+</sup> 502.9382; Found 502.9369.



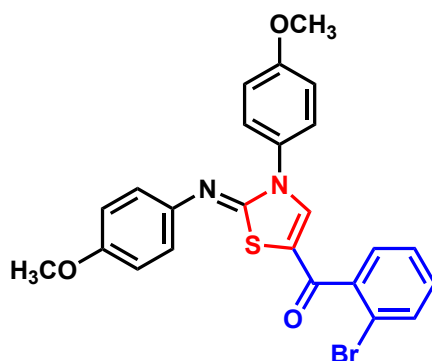

*(Z)*-2-bromophenyl(3-(4-methoxyphenyl)-2-((4-methoxyphenyl)imino)-2,3-dihydrothiazol-5-yl)methanone (**3j**). According to the general procedure, the residue was purified by flash chromatography on silica gel (petroleum ether/ethyl acetate = 10:1) to give the target compound **3j** as a yellow oil (138.6 mg, 56% yield). <sup>1</sup>H NMR (400 MHz, CDCl<sub>3</sub>) δ 7.50 (d, *J* = 7.9 Hz, 1H), 7.30–7.23 (m, 4H), 7.20–7.15 (m, 1H), 7.06 (s, 1H), 6.88 (d, *J* = 8.3 Hz, 2H), 6.83 (d, *J* = 8.3 Hz, 2H), 6.77 (d, *J* = 8.3 Hz, 2H), 3.68 (s, 3H), 3.67 (s, 3H). <sup>13</sup>C NMR (100 MHz, CDCl<sub>3</sub>) δ 183.9, 158.4, 155.3, 142.4, 139.6, 138.4, 132.5, 130.4, 128.9, 127.8, 126.3, 126.2, 120.9, 118.6, 115.8, 113.7, 113.6, 54.5, 54.4. IR (Diamond-ATR, neat):  $\nu$  / cm<sup>-1</sup> = 2930, 2834, 1618, 1568, 1504, 1464, 1384, 1302, 1269, 1246, 1200, 1178, 1147, 1106, 1028, 893, 834, 778, 741, 702, 679, 639, 575, 537. HRMS (ESI) *m/z* [M + H]<sup>+</sup> Calcd for C<sub>24</sub>H<sub>20</sub>BrN<sub>2</sub>O<sub>3</sub>S<sup>+</sup> 495.0373; Found 495.0364.

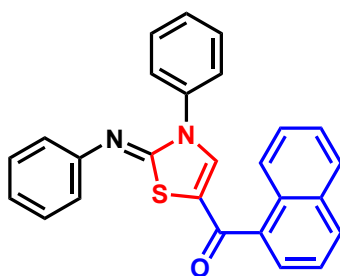

*(Z)*-naphthalen-1-yl(3-phenyl-2-(phenylimino)-2,3-dihydrothiazol-5-yl)methanone (**3k**). According to the general procedure, the residue was purified by flash chromatography on silica gel (petroleum ether/ethyl acetate = 10:1) to give the target compound **3k** as a yellow oil (147.8 mg, 73% yield). <sup>1</sup>H NMR (400 MHz, CDCl<sub>3</sub>) δ 8.04 (d, *J* = 8.0 Hz, 1H), 7.84 (d, *J* = 8.2 Hz, 1H), 7.76 (d, *J* = 7.6 Hz, 1H), 7.53 (d, *J* = 7.0 Hz, 1H), 7.43–7.41 (m, 2H), 7.38–7.35 (m, 3H), 7.32–7.22 (m, 5H), 7.18 (s, 1H),

7.02–6.95(m, 3H).  $^{13}\text{C}$  NMR (100 MHz,  $\text{CDCl}_3$ )  $\delta$  186.0, 155.6, 149.3, 138.3, 136.2, 134.2, 132.8, 130.2, 129.4, 128.6, 128.3, 127.4, 127.3, 126.4, 125.7, 125.1, 124.6, 124.2, 123.3, 123.2, 119.9, 118.5. IR (Diamond-ATR, neat):  $\nu / \text{cm}^{-1} = 2918, 1618, 1567, 1493, 1383, 1296, 1270, 1227, 1200, 1148, 891, 783, 764, 697, 619$ . HRMS (ESI)  $m/z$   $[\text{M} + \text{H}]^+$  Calcd for  $\text{C}_{26}\text{H}_{19}\text{N}_2\text{OS}^+$  407.1213; Found 407.1226.

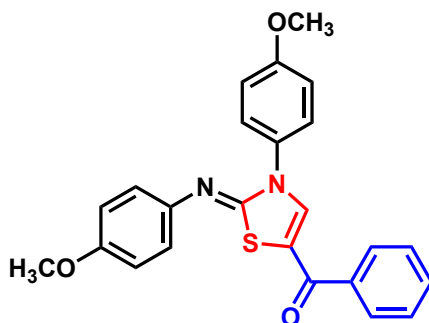

*(Z)*-3-(4-methoxyphenyl)-2-((4-methoxyphenyl)imino)-2,3-dihydrothiazol-5-yl(phenyl)methanone (**3l**). According to the general procedure, the residue was purified by flash chromatography on silica gel (petroleum ether/ethyl acetate = 10:1) to give the target compound **3l** as a yellow oil (202.1 mg, 97% yield).  $^1\text{H}$  NMR (400 MHz,  $\text{CDCl}_3$ )  $\delta$  7.56 (d,  $J = 7.1$  Hz, 2H), 7.35 (t,  $J = 7.4$  Hz, 1H), 7.30–7.26 (m, 5H), 6.84 (d,  $J = 8.9$  Hz, 2H), 6.79 (d,  $J = 8.9$  Hz, 2H), 6.72 (d,  $J = 8.9$  Hz, 2H), 3.62 (s, 6H), 3.60 (s, 6H).  $^{13}\text{C}$  NMR (100 MHz,  $\text{CDCl}_3$ )  $\delta$  184.5, 158.2, 155.3, 155.2, 142.6, 138.0, 136.6, 130.9, 129.1, 127.6, 127.1, 126.1, 120.9, 116.0, 113.6, 113.5, 54.4, 54.3. IR (Diamond-ATR, neat):  $\nu / \text{cm}^{-1} = 2918, 1624, 1567, 1504, 1384, 1244, 1200, 1176, 1030, 891, 833, 709, 655, 574, 533$ . HRMS (ESI)  $m/z$   $[\text{M} + \text{H}]^+$  Calcd for  $\text{C}_{24}\text{H}_{21}\text{N}_2\text{O}_3\text{S}^+$  417.1267; Found 417.1274.

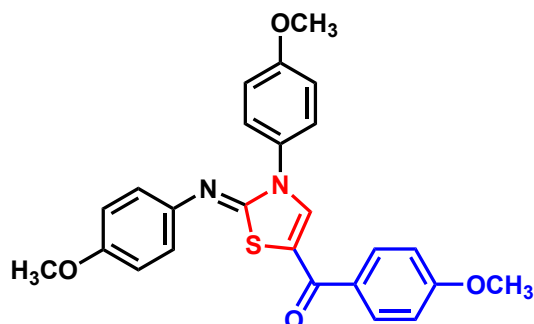

*(Z)*-4-methoxyphenyl(3-(4-methoxyphenyl)-2-((4-methoxyphenyl)imino)-2,3-dihydrothiazol-5-yl)methanone (**3m**). According to the general procedure, the residue

was purified by flash chromatography on silica gel (petroleum ether/ethyl acetate = 10:1) to give the target compound **3m** as a yellow oil (218.1 mg, 98% yield). <sup>1</sup>H NMR (400 MHz, CDCl<sub>3</sub>) δ 7.59 (d, *J* = 8.7 Hz, 2H), 7.33–7.29 (m, 3H), 6.86–6.77 (m, 6H), 6.73 (d, *J* = 8.9 Hz, 2H), 3.66 (s, 3H), 3.64 (s, 3H), 3.62 (s, 3H). <sup>13</sup>C NMR (100 MHz, CDCl<sub>3</sub>) δ 183.3, 161.8, 158.2, 155.5, 155.1, 142.8, 137.1, 129.4, 129.3, 129.1, 126.1, 120.9, 116.0, 113.6, 113.5, 112.9, 54.5, 54.4, 54.3. IR (Diamond-ATR, neat):  $\nu / \text{cm}^{-1}$  = 2931, 2836, 1601, 1505, 1463, 1383, 1304, 1254, 1200, 1170, 1030, 893, 833, 755, 696, 608, 570, 537. HRMS (ESI) *m/z* [M + H]<sup>+</sup> Calcd for C<sub>25</sub>H<sub>23</sub>N<sub>2</sub>O<sub>4</sub>S<sup>+</sup> 447.1373; Found 447.1377.

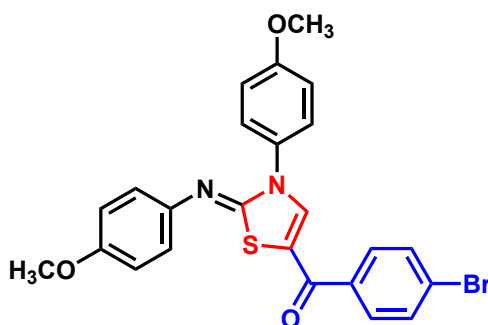

*(Z)*-4-bromo-*N*-(4-methoxyphenyl)-2-((4-methoxyphenyl)imino)-2,3-dihydrothiazol-5-ylmethanone (**3n**). According to the general procedure, the residue was purified by flash chromatography on silica gel (petroleum ether/ethyl acetate = 10:1) to give the target compound **3n** as a yellow oil (204.3 mg, 83% yield). <sup>1</sup>H NMR (400 MHz, CDCl<sub>3</sub>) δ 7.45 (s, 4H), 7.31 (d, *J* = 10.0 Hz, 3H), 6.85 (t, *J* = 8.6 Hz, 4H), 6.76 (d, *J* = 8.9 Hz, 2H), 3.68 (s, 3H), 3.65 (s, 3H). <sup>13</sup>C NMR (100 MHz, CDCl<sub>3</sub>) δ 183.3, 158.4, 155.3, 155.2, 142.5, 138.1, 135.4, 130.9, 129.0, 128.7, 126.1, 125.7, 120.9, 115.7, 113.7, 113.6, 54.5, 54.4. IR (Diamond-ATR, neat):  $\nu / \text{cm}^{-1}$  = 2929, 1621, 1572, 1504, 1463, 1396, 1270, 1243, 1201, 1174, 1131, 1107, 1068, 1031, 1010, 891, 831, 745, 700, 679, 577, 537. HRMS (ESI) *m/z* [M + H]<sup>+</sup> Calcd for C<sub>24</sub>H<sub>20</sub>BrN<sub>2</sub>O<sub>3</sub>S<sup>+</sup> 495.0373; Found 495.0368.

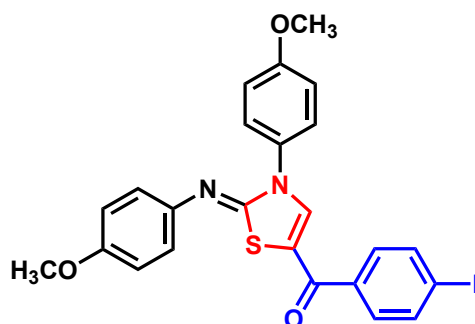

(*Z*)-(4-iodophenyl)(3-(4-methoxyphenyl)-2-((4-methoxyphenyl)imino)-2,3-dihydrothiazol-5-yl)methanone (**3o**). According to the general procedure, the residue was purified by flash chromatography on silica gel (petroleum ether/ethyl acetate = 10:1) to give the target compound **3o** as a yellow oil (247.4 mg, 91% yield). <sup>1</sup>H NMR (400 MHz, CDCl<sub>3</sub>) δ 7.65 (d, *J* = 8.3 Hz, 2H), 7.32–7.28 (m, 5H), 6.86–6.781 (m, 4H), 6.75 (d, *J* = 8.9 Hz, 2H), 3.67 (s, 3H), 3.64 (s, 3H). <sup>13</sup>C NMR (100 MHz, CDCl<sub>3</sub>) δ 183.5, 158.3, 155.2, 155.1, 142.5, 138.2, 136.8, 135.9, 129.0, 128.6, 126.1, 120.9, 115.7, 113.7, 113.5, 98.2, 54.5, 54.4. IR (Diamond-ATR, neat):  $\nu$  / cm<sup>-1</sup> = 2918, 1571, 1504, 1392, 1244, 1201, 1178, 1031, 1006, 891, 830, 743, 676, 576, 535. HRMS (ESI) *m/z* [M + H]<sup>+</sup> Calcd for C<sub>24</sub>H<sub>20</sub>I<sub>2</sub>N<sub>2</sub>O<sub>3</sub>S<sup>+</sup> 543.0234; Found 543.0250.

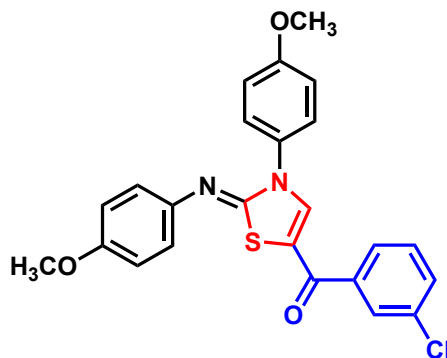

(*Z*)-(3-chlorophenyl)(3-(4-methoxyphenyl)-2-((4-methoxyphenyl)imino)-2,3-dihydrothiazol-5-yl)methanone (**3p**). According to the general procedure, the residue was purified by flash chromatography on silica gel (petroleum ether/ethyl acetate = 10:1) to give the target compound **3p** as a yellow solid (185.0 mg, 82% yield). mp: 162–164 °C. <sup>1</sup>H NMR (400 MHz, CDCl<sub>3</sub>) δ 7.53 (s, 1H), 7.42 (d, *J* = 7.6 Hz, 1H), 7.34–7.27 (m, 4H), 7.21 (t, *J* = 7.8 Hz, 1H), 6.85–6.80 (m, 4H), 6.73 (d, *J* = 8.9 Hz, 2H), 3.64 (s, 3H), 3.62 (s, 3H). <sup>13</sup>C NMR (100 MHz, CDCl<sub>3</sub>) δ 182.9, 158.3, 155.3, 155.0, 142.4, 138.4, 138.2, 133.8, 130.8, 129.0, 127.1, 126.1, 125.2, 120.8, 115.6, 113.7, 113.5, 54.5,

54.3. IR (Diamond-ATR, neat):  $\nu / \text{cm}^{-1} = 2926, 1596, 1574, 1508, 1466, 1419, 1380, 1315, 1299, 1266, 1250, 1201, 1173, 1091, 1040, 1022, 913, 834, 804, 748, 707, 674, 652, 580, 535$ . HRMS (ESI)  $m/z [M + H]^+$  Calcd for  $\text{C}_{24}\text{H}_{20}\text{ClN}_2\text{O}_3\text{S}^+$  451.0878; Found 451.0868.

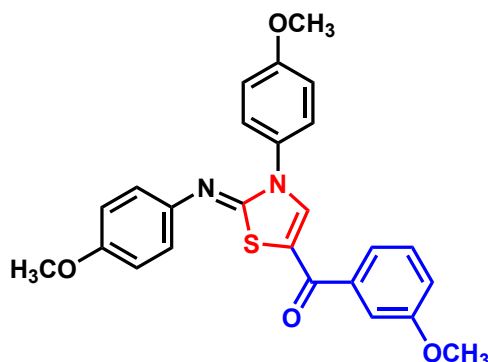

*(Z)*-(3-methoxyphenyl)(3-(4-methoxyphenyl)-2-((4-methoxyphenyl)imino)-2,3-dihydrothiazol-5-yl)methanone (**3q**). According to the general procedure, the residue was purified by flash chromatography on silica gel (petroleum ether/ethyl acetate = 10:1) to give the target compound **3q** as a yellow oil (205.6 mg, 92% yield).  $^1\text{H}$  NMR (400 MHz,  $\text{CDCl}_3$ )  $\delta$  7.36 (s, 1H), 7.29 (d,  $J = 8.0$  Hz, 2H), 7.21–7.14 (m, 2H), 7.10 (s, 1H), 6.92 (d,  $J = 7.9$  Hz, 1H), 6.86–6.80 (m, 4H), 6.74 (d,  $J = 8.0$  Hz, 2H), 3.66 (s, 3H), 3.65 (s, 3H), 3.62 (s, 3H).  $^{13}\text{C}$  NMR (100 MHz,  $\text{CDCl}_3$ )  $\delta$  184.3, 158.7, 158.3, 155.4, 155.2, 142.6, 138.1, 137.9, 129.1, 128.6, 126.1, 120.9, 119.5, 117.0, 115.9, 113.6, 113.5, 112.1, 54.5, 54.4, 54.3. IR (Diamond-ATR, neat):  $\nu / \text{cm}^{-1} = 3081, 2953, 2835, 1624, 1567, 1509, 1465, 1426, 1385, 1276, 1247, 1205, 1172, 1127, 1034, 867, 836, 812, 791, 762, 741, 677, 657, 606, 585, 569, 538$ . HRMS (ESI)  $m/z [M + H]^+$  Calcd for  $\text{C}_{25}\text{H}_{23}\text{N}_2\text{O}_4\text{S}^+$  447.1373; Found 447.1385.

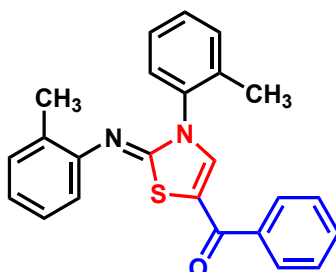

*(Z)*-phenyl(3-(*o*-tolyl)-2-(*o*-tolylimino)-2,3-dihydrothiazol-5-yl)methanone (**3r**).

According to the general procedure, the residue was purified by flash chromatography

on silica gel (petroleum ether/ethyl acetate = 10:1) to give the target compound **3r** as a yellow solid (187.8 mg, 98% yield). mp: 150–152 °C. <sup>1</sup>H NMR (400 MHz, CDCl<sub>3</sub>) δ 7.61 (d, *J* = 7.1 Hz, 2H), 7.40 (d, *J* = 7.3 Hz, 1H), 7.33 (t, *J* = 7.4 Hz, 2H), 7.26–7.20 (m, 5H), 7.07 (t, *J* = 7.8 Hz, 2H), 6.91–6.85 (m, 2H), 2.28 (s, 3H), 2.03 (s, 3H). <sup>13</sup>C NMR (100 MHz, CDCl<sub>3</sub>) δ 184.7, 155.3, 148.4, 137.8, 136.6, 135.5, 134.9, 131.0, 130.4, 129.8, 128.9, 128.7, 127.6, 127.2, 126.9, 126.2, 126.0, 123.1, 118.4, 116.9, 16.9, 16.7. IR (Diamond-ATR, neat):  $\nu$  / cm<sup>-1</sup> = 3060, 2918, 1628, 1560, 1485, 1380, 1285, 1236, 1214, 1122, 894, 834, 766, 752, 724, 709, 660, 631. HRMS (ESI) *m/z* [M + H]<sup>+</sup> Calcd for C<sub>24</sub>H<sub>21</sub>N<sub>2</sub>OS<sup>+</sup> 385.1369; Found 385.1366.

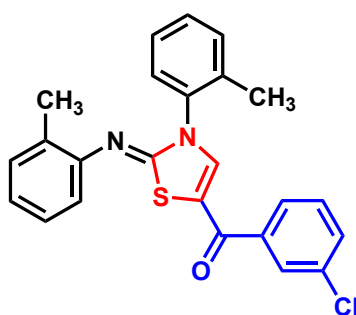

*(Z)*-(3-chlorophenyl)(3-(*o*-tolyl)-2-(*o*-tolylimino)-2,3-dihydrothiazol-5-yl)methanone (**3s**). According to the general procedure, the residue was purified by flash chromatography on silica gel (petroleum ether/ethyl acetate = 10:1) to give the target compound **3s** as a yellow oil (186.6 mg, 89% yield). <sup>1</sup>H NMR (400 MHz, CDCl<sub>3</sub>) δ 7.55 (s, 1H), 7.44 (d, *J* = 7.6 Hz, 1H), 7.34 (d, *J* = 8.0 Hz, 1H), 7.24–7.18 (m, 6H), 7.05 (t, *J* = 7.8 Hz, 2H), 6.89–6.82 (m, 2H), 2.26 (s, 3H), 2.01 (s, 3H). <sup>13</sup>C NMR (100 MHz, CDCl<sub>3</sub>) δ 183.0, 155.0, 148.2, 138.2, 138.1, 135.3, 134.8, 133.8, 130.9, 130.4, 129.8, 129.0, 128.8, 128.8, 127.2, 126.8, 126.3, 126.0, 125.2, 123.2, 118.2, 116.5, 16.9, 16.7. IR (Diamond-ATR, neat):  $\nu$  / cm<sup>-1</sup> = 3058, 2918, 1609, 1559, 1492, 1421, 1376, 1295, 1273, 1231, 1212, 1188, 1115, 915, 806, 762, 744, 713, 633, 445. HRMS (ESI) *m/z* [M + H]<sup>+</sup> Calcd for C<sub>24</sub>H<sub>20</sub>ClN<sub>2</sub>OS<sup>+</sup> 419.0979; Found 419.0992.

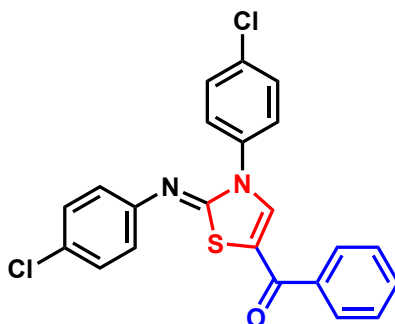

(*Z*)-3-(4-chlorophenyl)-2-((4-chlorophenyl)imino)-2,3-dihydrothiazol-5-yl(phenyl)methanone (**3t**). According to the general procedure, the residue was purified by flash chromatography on silica gel (petroleum ether/ethyl acetate = 10:1) to give the target compound **3t** as a yellow solid (180.6 mg, 85% yield). mp: 154–156 °C. <sup>1</sup>H NMR (400 MHz, CDCl<sub>3</sub>) δ 7.71 (d, *J* = 6.9 Hz, 2H), 7.55–7.42 (m, 8H), 7.28 (d, *J* = 8.6 Hz, 2H), 6.96 (d, *J* = 8.5 Hz, 2H). <sup>13</sup>C NMR (100 MHz, CDCl<sub>3</sub>) δ 185.6, 156.7, 148.6, 137.6, 137.3, 135.6, 134.3, 132.3, 129.6, 129.3, 128.8, 128.2, 127.1, 122.3, 118.3. IR (Diamond-ATR, neat): ν / cm<sup>-1</sup> = 3083, 1628, 1602, 1573, 1490, 1447, 1381, 1283, 1270, 1229, 1206, 1175, 1130, 1097, 1015, 891, 826, 790, 715, 652, 526, 490, 477. HRMS (ESI) *m/z* [M + H]<sup>+</sup> Calcd for C<sub>22</sub>H<sub>15</sub>Cl<sub>2</sub>N<sub>2</sub>OS<sup>+</sup> 425.0277; Found 425.0286.

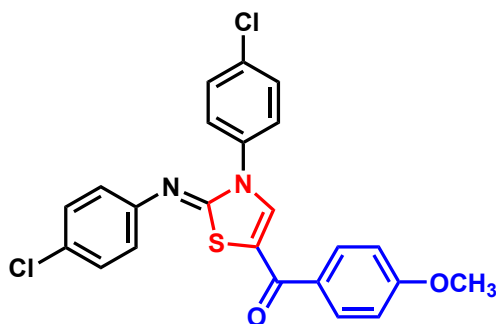

(*Z*)-3-(4-chlorophenyl)-2-((4-chlorophenyl)imino)-2,3-dihydrothiazol-5-yl(4-methoxyphenyl)methanone (**3u**). According to the general procedure, the residue was purified by flash chromatography on silica gel (petroleum ether/ethyl acetate = 10:1) to give the target compound **3u** as a yellow solid (222.2 mg, 98% yield). mp: 232–234 °C. <sup>1</sup>H NMR (400 MHz, DMSO-*d*<sub>6</sub>) δ 8.10 (s, 1H), 7.86 (d, *J* = 8.8 Hz, 2H), 7.77 (d, *J* = 8.8 Hz, 2H), 7.59 (d, *J* = 8.8 Hz, 2H), 7.42 (d, *J* = 8.6 Hz, 2H), 7.04 (t, *J* = 8.6 Hz, 4H), 3.84 (s, 3H). <sup>13</sup>C NMR (100 MHz, DMSO-*d*<sub>6</sub>) δ 184.0, 163.6, 157.3, 151.0, 140.6, 137.3, 133.5, 131.3, 130.5, 129.7, 129.4, 128.7, 128.3, 123.0, 117.0, 114.6, 56.5. IR

(Diamond-ATR, neat):  $\nu / \text{cm}^{-1} = 3081, 2928, 1725, 1615, 1580, 1560, 1508, 1490, 1413, 1384, 1317, 1285, 1263, 1229, 1199, 1169, 1135, 1091, 1024, 894, 866, 836, 784, 757, 740, 697, 617, 602, 507, 494, 473$ . HRMS (ESI)  $m/z$   $[\text{M} + \text{H}]^+$  Calcd for  $\text{C}_{23}\text{H}_{17}\text{Cl}_2\text{N}_2\text{O}_2\text{S}^+$  455.0382; Found 455.0390.

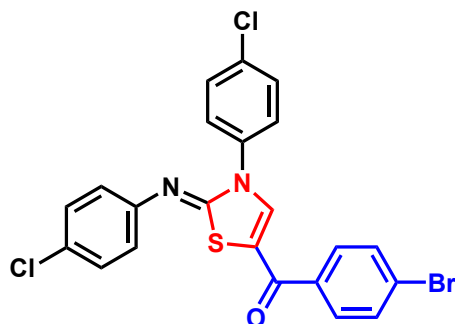

*(Z)*-2-(4-bromophenyl)-3-(4-chlorophenyl)-2-((4-chlorophenyl)imino)-2,3-dihydrothiazol-5-ylmethanone (**3v**). According to the general procedure, the residue was purified by flash chromatography on silica gel (petroleum ether/ethyl acetate = 10:1) to give the target compound **3v** as a yellow oil (233.7 mg, 93% yield).  $^1\text{H}$  NMR (400 MHz,  $\text{CDCl}_3$ )  $\delta$  7.56–7.44 (m, 5H), 7.34 (s, 2H), 7.29 (d,  $J = 8.8$  Hz, 2H), 7.14 (d,  $J = 8.6$  Hz, 2H), 6.82 (d,  $J = 8.6$  Hz, 2H).  $^{13}\text{C}$  NMR (100 MHz,  $\text{CDCl}_3$ )  $\delta$  183.2, 155.3, 147.3, 136.7, 134.9, 134.5, 133.2, 131.0, 128.7, 128.6, 128.6, 128.3, 126.3, 126.0, 121.2, 116.9. IR (Diamond-ATR, neat):  $\nu / \text{cm}^{-1} = 2918, 2850, 1614, 1582, 1484, 1395, 1307, 1283, 1230, 1200, 1175, 1129, 1089, 1068, 1010, 891, 830, 745, 675, 605, 538, 475$ . HRMS (ESI)  $m/z$   $[\text{M} + \text{H}]^+$  Calcd for  $\text{C}_{22}\text{H}_{14}\text{BrCl}_2\text{N}_2\text{OS}^+$  502.9382; Found 502.9374.

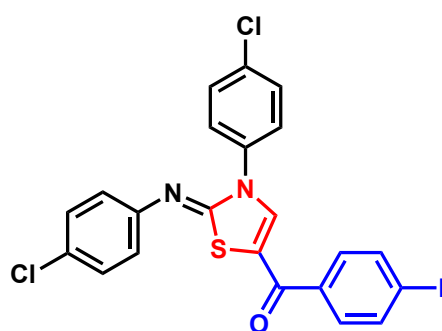

*(Z)*-2-(3-(4-chlorophenyl)-2-((4-chlorophenyl)imino)-2,3-dihydrothiazol-5-yl)(4-iodophenyl)methanone (**3w**). According to the general procedure, the residue was purified by flash chromatography on silica gel (petroleum ether/ethyl acetate = 10:1) to



give the target compound **3w** as a yellow oil (230.4 mg, 84% yield). <sup>1</sup>H NMR (400 MHz, CDCl<sub>3</sub>) δ 7.67 (d, *J* = 8.1 Hz, 2H), 7.35–7.28 (m, 7H), 7.16 (d, *J* = 8.6 Hz, 2H), 6.83 (d, *J* = 8.6 Hz, 2H). <sup>13</sup>C NMR (100 MHz, CDCl<sub>3</sub>) δ 184.6, 156.4, 148.5, 138.1, 138.0, 137.8, 136.6, 135.6, 134.4, 129.7, 129.7, 129.4, 127.1, 122.4, 118.0, 99.8. IR (Diamond-ATR, neat):  $\nu / \text{cm}^{-1} = 2918, 2850, 1617, 1581, 1484, 1391, 1307, 1283, 1231, 1200, 1179, 1089, 1006, 890, 829, 743, 666, 474$ . HRMS (ESI) *m/z* [M + H]<sup>+</sup> Calcd for C<sub>22</sub>H<sub>14</sub>Cl<sub>2</sub>IN<sub>2</sub>OS<sup>+</sup> 550.9243; Found 550.9251.

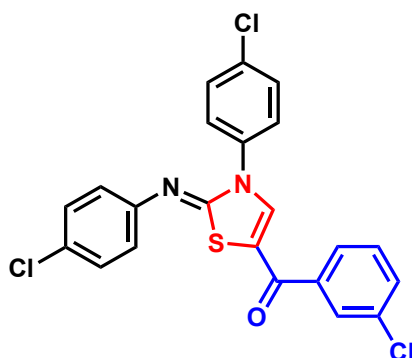

*(Z)*-3-(4-chlorophenyl)-2-((4-chlorophenyl)imino)-2,3-dihydrothiazol-5-ylmethanone (**3x**). According to the general procedure, the residue was purified by flash chromatography on silica gel (petroleum ether/ethyl acetate = 10:1) to give the target compound **3x** as a yellow solid (172.0 mg, 75% yield). mp: 163–165 °C. <sup>1</sup>H NMR (400 MHz, CDCl<sub>3</sub>) δ 7.60 (s, 1H), 7.49 (d, *J* = 7.7 Hz, 1H), 7.45–7.36 (m, 6H), 7.32 (t, *J* = 7.8 Hz, 1H), 7.21 (d, *J* = 8.7 Hz, 2H), 6.87 (d, *J* = 8.6 Hz, 2H). <sup>13</sup>C NMR (100 MHz, CDCl<sub>3</sub>) δ 183.0, 155.5, 147.4, 137.9, 136.9, 134.5, 134.0, 133.5, 131.3, 129.1, 128.7, 128.7, 128.4, 127.2, 126.1, 125.2, 121.2, 116.9. IR (Diamond-ATR, neat):  $\nu / \text{cm}^{-1} = 3082, 2917, 1619, 1581, 1557, 1491, 1413, 1384, 1310, 1286, 1269, 1228, 1202, 1164, 1143, 1091, 1015, 916, 876, 834, 801, 746, 719, 691, 649, 606, 518, 503, 487, 475, 464$ . HRMS (ESI) *m/z* [M + H]<sup>+</sup> Calcd for C<sub>22</sub>H<sub>14</sub>Cl<sub>3</sub>N<sub>2</sub>OS<sup>+</sup> 458.9887; Found 458.9901.

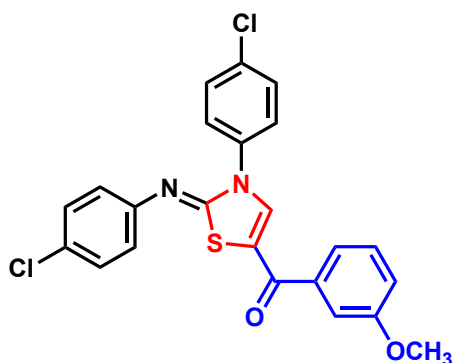

(*Z*)-3-(4-chlorophenyl)-2-((4-chlorophenyl)imino)-2,3-dihydrothiazol-5-yl(3-methoxyphenyl)methanone (**3y**). According to the general procedure, the residue was purified by flash chromatography on silica gel (petroleum ether/ethyl acetate = 10:1) to give the target compound **3y** as a yellow solid (185.9 mg, 82% yield). mp: 162–164 °C. <sup>1</sup>H NMR (400 MHz, CDCl<sub>3</sub>) δ 7.38–7.31 (m, 5H), 7.27–7.12 (m, 5H), 6.98 (d, *J* = 7.2 Hz, 1H), 6.85 (d, *J* = 8.2 Hz, 2H), 3.71 (s, 3H). <sup>13</sup>C NMR (100 MHz, CDCl<sub>3</sub>) δ 184.3, 158.9, 155.7, 147.5, 137.5, 136.7, 134.6, 133.2, 128.8, 128.6, 128.6, 128.2, 126.0, 121.3, 119.5, 117.3, 117.2, 112.2, 54.4. IR (Diamond-ATR, neat):  $\nu$  / cm<sup>-1</sup> = 3084, 1617, 1566, 1492, 1449, 1429, 1381, 1310, 1288, 1267, 1247, 1227, 1199, 1089, 1047, 1015, 931, 837, 824, 773, 744, 656, 519, 509, 487, 472. HRMS (ESI) *m/z* [M + H]<sup>+</sup> Calcd for C<sub>23</sub>H<sub>17</sub>Cl<sub>2</sub>N<sub>2</sub>O<sub>2</sub>S<sup>+</sup> 455.0382; Found 455.0395.

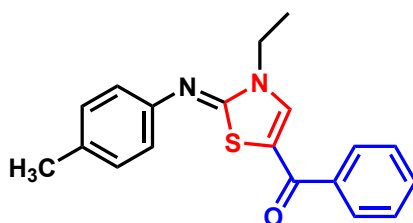

(*Z*)-3-ethyl-2-(*p*-tolylimino)-2,3-dihydrothiazol-5-yl(phenyl)methanone (**3aa**). According to the general procedure, the residue was purified by flash chromatography on silica gel (petroleum ether/ethyl acetate = 10:1) to give the target compound **3aa** as a yellow oil (129.1 mg, 80% yield). <sup>1</sup>H NMR (400 MHz, CDCl<sub>3</sub>) δ 7.71 (d, *J* = 4.8 Hz, 2H), 7.51 (d, *J* = 7.3 Hz, 1H), 7.45 (d, *J* = 7.6 Hz, 2H), 7.41 (s, 1H), 7.32 (d, *J* = 8.4 Hz, 2H), 7.23 (s, 1H), 7.02–6.91 (m, 1H), 3.23 (q, *J* = 7.2 Hz, 2H), 2.35 (s, 3H), 1.24 (t, *J* = 7.2 Hz, 3H). <sup>13</sup>C NMR (100 MHz, CDCl<sub>3</sub>) δ 185.7, 157.4, 141.7, 138.6, 137.9, 135.0, 132.6, 130.0, 128.6, 128.2, 125.9, 114.2, 50.2, 24.7, 14.9. IR (Diamond-ATR,

neat):  $\nu / \text{cm}^{-1} = 2918, 2850, 1635, 1566, 1512, 1446, 1384, 1317, 1249, 1177, 1134, 888, 819, 711, 653, 607, 524$ . HRMS (ESI)  $m/z$   $[\text{M} + \text{H}]^+$  Calcd for  $\text{C}_{19}\text{H}_{19}\text{N}_2\text{OS}^+$  323.1213; Found 323.1204.

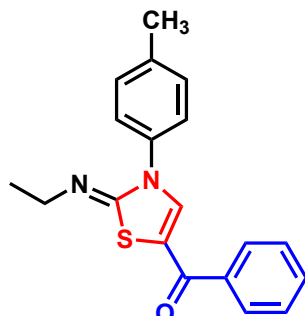

*(Z)*-2-(2-(ethylimino)-3-(*p*-tolyl)-2,3-dihydrothiazol-5-yl)(phenyl)methanone (**3ab**).

According to the general procedure, the residue was purified by flash chromatography on silica gel (petroleum ether/ethyl acetate = 10:1) to give the target compound **3ab** as a yellow oil (23.8 mg, 15% yield).  $^1\text{H}$  NMR (400 MHz,  $\text{CDCl}_3$ )  $\delta$  7.71 (d,  $J = 7.0$  Hz, 2H), 7.58 (t,  $J = 7.4$  Hz, 1H), 7.50 (t,  $J = 7.4$  Hz, 2H), 7.38 (s, 1H), 7.19 (d,  $J = 8.0$  Hz, 2H), 7.01 (d,  $J = 8.2$  Hz, 2H), 4.01 (q,  $J = 7.2$  Hz, 2H), 2.36 (s, 3H), 1.44 (t,  $J = 7.2$  Hz, 3H).  $^{13}\text{C}$  NMR (100 MHz,  $\text{CDCl}_3$ )  $\delta$  184.5, 155.3, 146.7, 137.3, 137.0, 132.4, 130.8, 129.1, 127.6, 127.2, 119.8, 115.3, 42.2, 19.2, 13.2. IR (Diamond-ATR, neat):  $\nu / \text{cm}^{-1} = 3072, 2918, 1741, 1620, 1602, 1559, 1505, 1447, 1414, 1379, 1340, 1301, 1260, 1220, 1194, 1177, 1131, 1102, 932, 872, 840, 827, 792, 715, 674, 655, 623, 543, 527, 506$ . HRMS (ESI)  $m/z$   $[\text{M} + \text{H}]^+$  Calcd for  $\text{C}_{19}\text{H}_{19}\text{N}_2\text{OS}^+$  323.1213; Found 323.1216.

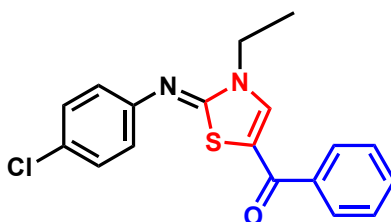

*(Z)*-2-((4-chlorophenyl)imino)-3-ethyl-2,3-dihydrothiazol-5-yl(phenyl)methanone

**(3ac)**. According to the general procedure, the residue was purified by flash chromatography on silica gel (petroleum ether/ethyl acetate = 10:1) to give the target compound **3ac** as a yellow oil (123.5 mg, 72% yield).  $^1\text{H}$  NMR (400 MHz,  $\text{CDCl}_3$ )  $\delta$  7.60 (d,  $J = 7.1$  Hz, 2H), 7.45–7.26 (m, 8H), 3.11 (q,  $J = 7.2$  Hz, 2H), 1.15 (t,  $J = 7.2$

Hz, 3H).  $^{13}\text{C}$  NMR (100 MHz,  $\text{CDCl}_3$ )  $\delta$  184.6, 153.4, 137.5, 136.7, 135.0, 132.6, 130.9, 128.4, 127.7, 127.1, 125.8, 116.9, 49.1, 14.0. IR (Diamond-ATR, neat):  $\nu / \text{cm}^{-1} = 2969, 2853, 1744, 1635, 1613, 1594, 1565, 1494, 1447, 1414, 1385, 1354, 1315, 1282, 1256, 1231, 1176, 1128, 1083, 1054, 1016, 889, 840, 789, 709, 651, 605, 525, 496, 470$ . HRMS (ESI)  $m/z$   $[\text{M} + \text{H}]^+$  Calcd for  $\text{C}_{18}\text{H}_{16}\text{ClN}_2\text{OS}^+$  343.0666; Found 343.0660.

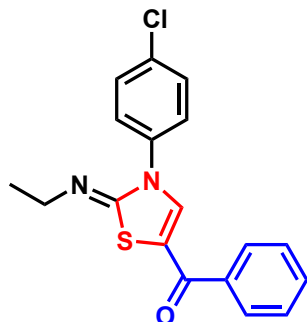

*(Z)*-3-(4-chlorophenyl)-2-(ethylimino)-2,3-dihydrothiazol-5-yl(phenyl)methanone (**3ad**). According to the general procedure, the residue was purified by flash chromatography on silica gel (petroleum ether/ethyl acetate = 10:1) to give the target compound **3ad** as a yellow oil (42.7 mg, 25% yield).  $^1\text{H}$  NMR (400 MHz,  $\text{CDCl}_3$ )  $\delta$  7.62 (d,  $J = 7.5$  Hz, 2H), 7.48 (d,  $J = 7.3$  Hz, 1H), 7.40 (t,  $J = 7.4$  Hz, 2H), 7.33 (d,  $J = 4.6$  Hz, 1H), 7.29 (s, 1H), 7.25 (s, 1H), 6.95 (d,  $J = 8.7$  Hz, 2H), 3.91 (q,  $J = 7.2$  Hz, 2H), 1.34 (t,  $J = 7.2$  Hz, 3H).  $^{13}\text{C}$  NMR (100 MHz,  $\text{CDCl}_3$ )  $\delta$  184.4, 156.0, 147.7, 137.1, 131.0, 128.6, 127.9, 127.7, 127.1, 125.8, 121.5, 115.6, 41.5, 13.1. IR (Diamond-ATR, neat):  $\nu / \text{cm}^{-1} = 2918, 1604, 1560, 1485, 1413, 1342, 1306, 1259, 1218, 1194, 1133, 1099, 870, 840, 711, 661, 622, 523$ . HRMS (ESI)  $m/z$   $[\text{M} + \text{H}]^+$  Calcd for  $\text{C}_{18}\text{H}_{16}\text{ClN}_2\text{OS}^+$  343.0666; Found 343.0673.

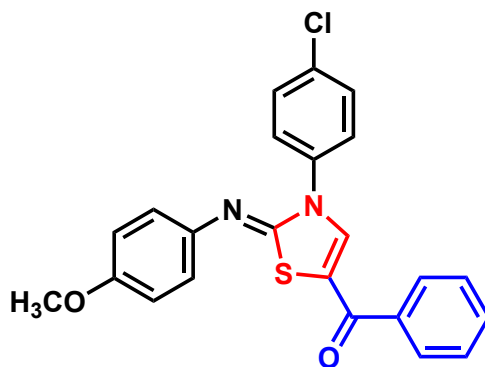

*(Z)*-3-(4-chlorophenyl)-2-((4-methoxyphenyl)imino)-2,3-dihydrothiazol-5-yl(phenyl)methanone (**3ae**). According to the general procedure, the residue was

purified by flash chromatography on silica gel (petroleum ether/ethyl acetate = 10:1) to give the target compound **3ae** as a yellow solid (106.9 mg, 51% yield). mp: 149–151 °C. <sup>1</sup>H NMR (400 MHz, CDCl<sub>3</sub>) δ 7.71 (d, *J* = 6.9 Hz, 2H), 7.56–7.48 (m, 4H), 7.46 (s, 1H), 7.44 (d, *J* = 2.7 Hz, 2H), 7.42 (s, 1H), 6.98 (d, *J* = 8.9 Hz, 2H), 6.88 (d, *J* = 8.9 Hz, 2H), 3.79 (s, 3H). <sup>13</sup>C NMR (100 MHz, CDCl<sub>3</sub>) δ 184.1, 156.4, 155.0, 146.8, 137.8, 137.5, 135.9, 134.0, 132.6, 129.6, 128.8, 128.2, 127.0, 122.7, 118.0, 115.2, 54.3. IR (Diamond-ATR, neat):  $\nu$  / cm<sup>-1</sup> = 2961, 1723, 1619, 1588, 1566, 1505, 1492, 1466, 1382, 1306, 1282, 1267, 1243, 1201, 1179, 1108, 1085, 1029, 1014, 890, 829, 792, 714, 704, 678, 654, 527, 474. HRMS (ESI) *m/z* [M + H]<sup>+</sup> Calcd for C<sub>23</sub>H<sub>18</sub>ClN<sub>2</sub>O<sub>2</sub>S<sup>+</sup> 421.0772; Found 421.0785.

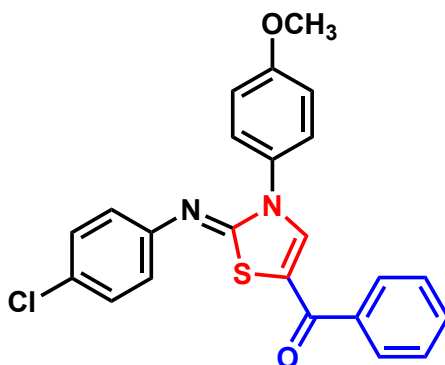

(*Z*)-2-((4-chlorophenyl)imino)-3-(4-methoxyphenyl)-2,3-dihydrothiazol-5-yl(phenyl)methanone (**3af**). According to the general procedure, the residue was purified by flash chromatography on silica gel (petroleum ether/ethyl acetate = 10:1) to give the target compound **3af** as a yellow oil (84.6 mg, 40% yield). <sup>1</sup>H NMR (400 MHz, CDCl<sub>3</sub>) δ 7.71 (d, *J* = 7.0 Hz, 2H), 7.53 (t, *J* = 7.4 Hz, 1H), 7.46–7.41 (m, 5H), 7.27 (d, *J* = 8.7 Hz, 2H), 6.98–6.95 (m, 4H), 3.80 (s, 3H). <sup>13</sup>C NMR (100 MHz, CDCl<sub>3</sub>) δ 171.4, 145.3, 143.3, 134.9, 124.6, 123.3, 118.0, 115.8, 115.4, 114.8, 114.6, 114.0, 113.0, 108.3, 103.3, 100.5, 41.4. IR (Diamond-ATR, neat):  $\nu$  / cm<sup>-1</sup> = 2918, 1627, 1609, 1574, 1511, 1480, 1382, 1303, 1268, 1249, 1231, 1195, 1138, 1091, 1030, 891, 844, 827, 791, 719, 659, 575, 509. HRMS (ESI) *m/z* [M + H]<sup>+</sup> Calcd for C<sub>23</sub>H<sub>18</sub>ClN<sub>2</sub>O<sub>2</sub>S<sup>+</sup> 421.0772; Found 421.0780.

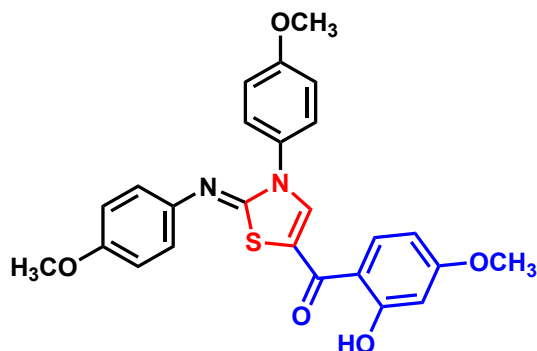

(*Z*)-2-(2-hydroxy-4-methoxyphenyl)-3-(4-methoxyphenyl)-2-((4-methoxyphenyl)imino)-2,3-dihydrothiazol-5-ylmethanone (**3ag**). According to the general procedure, the residue was purified by flash chromatography on silica gel (petroleum ether/ethyl acetate = 10:1) to give the target compound **3ag** as a yellow solid (67.2 mg, 29% yield). mp: 138–140 °C. <sup>1</sup>H NMR (400 MHz, CDCl<sub>3</sub>) δ 11.97 (s, 1H), 7.58 (d, *J* = 8.9 Hz, 1H), 7.52 (s, 1H), 7.39 (d, *J* = 8.9 Hz, 2H), 6.92–6.89 (m, 4H), 6.80 (d, *J* = 8.9 Hz, 2H), 6.39–6.34 (m, 2H), 3.75 (s, 3H), 3.73 (s, 3H), 3.70 (s, 3H). <sup>13</sup>C NMR (100 MHz, CDCl<sub>3</sub>) δ 185.2, 164.6, 163.8, 158.4, 155.3, 155.1, 142.7, 136.8, 130.2, 129.2, 126.2, 120.9, 114.1, 113.7, 113.6, 112.0, 106.6, 100.5, 54.6, 54.4. IR (Diamond-ATR, neat):  $\nu$  / cm<sup>-1</sup> = 3432, 2958, 2835, 1623, 1563, 1506, 1467, 1397, 1339, 1322, 1296, 1269, 1242, 1199, 1183, 1168, 1109, 1083, 1036, 883, 860, 832, 821, 802, 765, 731, 693, 652, 624, 575, 536, 521, 459. HRMS (ESI) *m/z* [M + H]<sup>+</sup> Calcd for C<sub>25</sub>H<sub>23</sub>N<sub>2</sub>O<sub>5</sub>S<sup>+</sup> 463.1322; Found 463.1310.

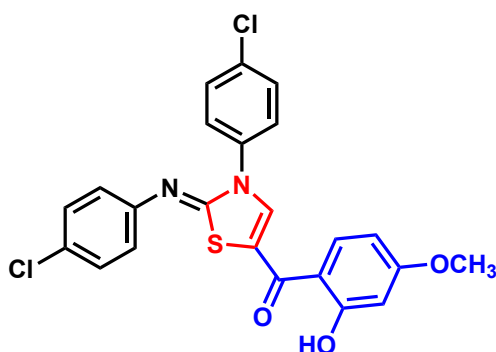

(*Z*)-3-(4-chlorophenyl)-2-((4-chlorophenyl)imino)-2,3-dihydrothiazol-5-yl(2-hydroxy-4-methoxyphenyl)methanone (**3ah**). According to the general procedure, the residue was purified by flash chromatography on silica gel (petroleum ether/ethyl acetate = 10:1) to give the target compound **3ah** as a yellow solid (81.8 mg, 35% yield).

mp: 190–192 °C.  $^1\text{H}$  NMR (400 MHz,  $\text{DMSO-}d_6$ )  $\delta$  11.27 (s, 1H), 8.19 (s, 1H), 7.79 (d,  $J = 8.6$  Hz, 3H), 7.63 (d,  $J = 8.6$  Hz, 2H), 7.45 (d,  $J = 8.5$  Hz, 2H), 7.07 (d,  $J = 8.5$  Hz, 2H), 6.56 (s, 2H), 3.85 (s, 3H).  $^{13}\text{C}$  NMR (100 MHz,  $\text{DMSO-}d_6$ )  $\delta$  185.6, 164.8, 161.6, 156.9, 149.5, 139.4, 136.3, 133.1, 132.7, 130.0, 129.5, 128.6, 128.2, 123.0, 116.6, 115.1, 107.2, 101.9, 56.0. IR (Diamond-ATR, neat):  $\nu / \text{cm}^{-1} = 3423, 2924, 1639, 1610, 1578, 1560, 1490, 1412, 1384, 1351, 1303, 1283, 1261, 1235, 1198, 1159, 1096, 1031, 1017, 860, 825, 768, 732, 691, 626, 578, 519, 506, 478, 419$ . HRMS (ESI)  $m/z$  [M + H]<sup>+</sup> Calcd for  $\text{C}_{23}\text{H}_{17}\text{Cl}_2\text{N}_2\text{O}_3\text{S}^+$  471.0331; Found 471.0340.

### 3. Control Experiments

#### 3.1. Reaction with Radical Trapping Agent TEMPO

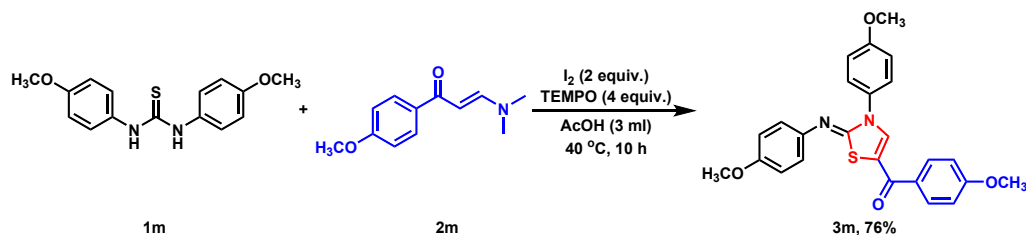

A mixture of **1m** (0.5 mmol, 1 equiv.), **2m** (0.6 mmol, 1.2 equiv.),  $I_2$  (1 mmol, 2 equiv.) and TEMPO (2 mmol, 4 equiv.) in AcOH (3.0 mL) was stirred and warmed at 40 °C, using a heating mantle, for 10 h, and the reaction was monitored by TLC until the starting material was consumed. The reaction was quenched with sat.  $Na_2S_2O_3$  solution (3 mL) and then extracted with ethyl acetate. The crude solution was dried over anhydrous  $Na_2SO_4$  and evaporated under a vacuum. The residue was purified by flash column chromatography to afford the desired product **3m** as a yellow solid (170.1 mg, 76% yield).

#### 3.2. Reaction with 7-Methoxy-4H-Chromen-4-One

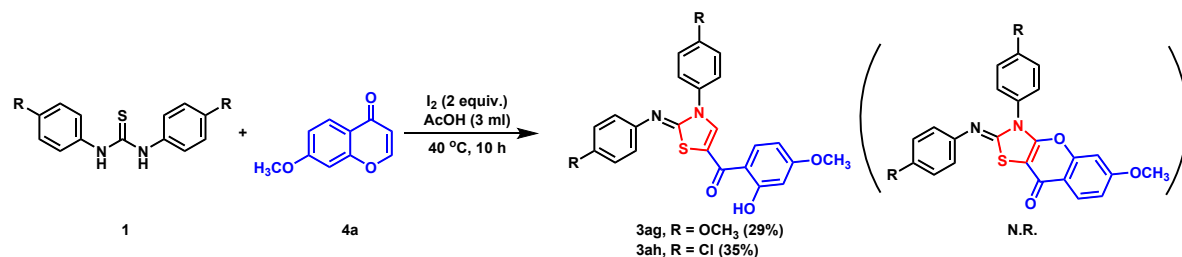

A mixture of **1** (0.5 mmol, 1 equiv.), **4a** (0.6 mmol, 1.2 equiv.) and  $I_2$  (1 mmol, 2 equiv.) in AcOH (3.0 mL) was stirred and warmed at 40 °C, using a heating mantle, for 10 h, and the reaction was monitored by TLC until the starting material was consumed. The reaction was quenched with sat.  $Na_2S_2O_3$  solution (3 mL) and then extracted with ethyl acetate. The crude solution was dried over anhydrous  $Na_2SO_4$  and evaporated under a vacuum. The residue was purified by flash column chromatography to afford the desired products **3ag** (67.2 mg, 29% yield) and **3ah** (81.8 mg, 35% yield) as two yellow solids.



### 3.3. Reaction with Chalcone

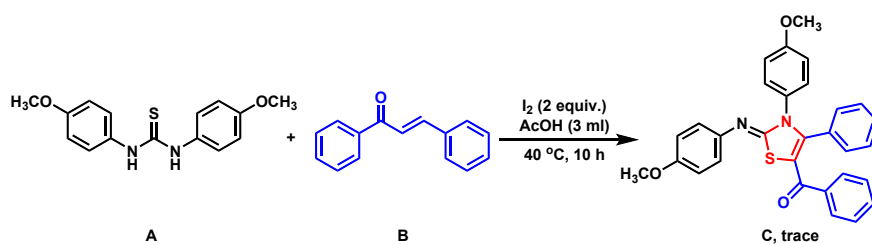

A mixture of **A** (0.5 mmol, 1 equiv.), **B** (0.6 mmol, 1.2 equiv.) and I<sub>2</sub> (1 mmol, 2 equiv.) in AcOH (3.0 mL) was stirred and warmed at 40 °C, using a heating mantle, for 10 h, and the reaction was monitored by TLC until the starting material was consumed, while the desired compound was not detected.

#### 4. Crystallographic Data of Compound 3a

The method for crystal growth is slow volatilization using DCM (dichloromethane) as a solvent. Crystallography data and structure refinement for **3a** (CCDC 2162042) (Figure S1).

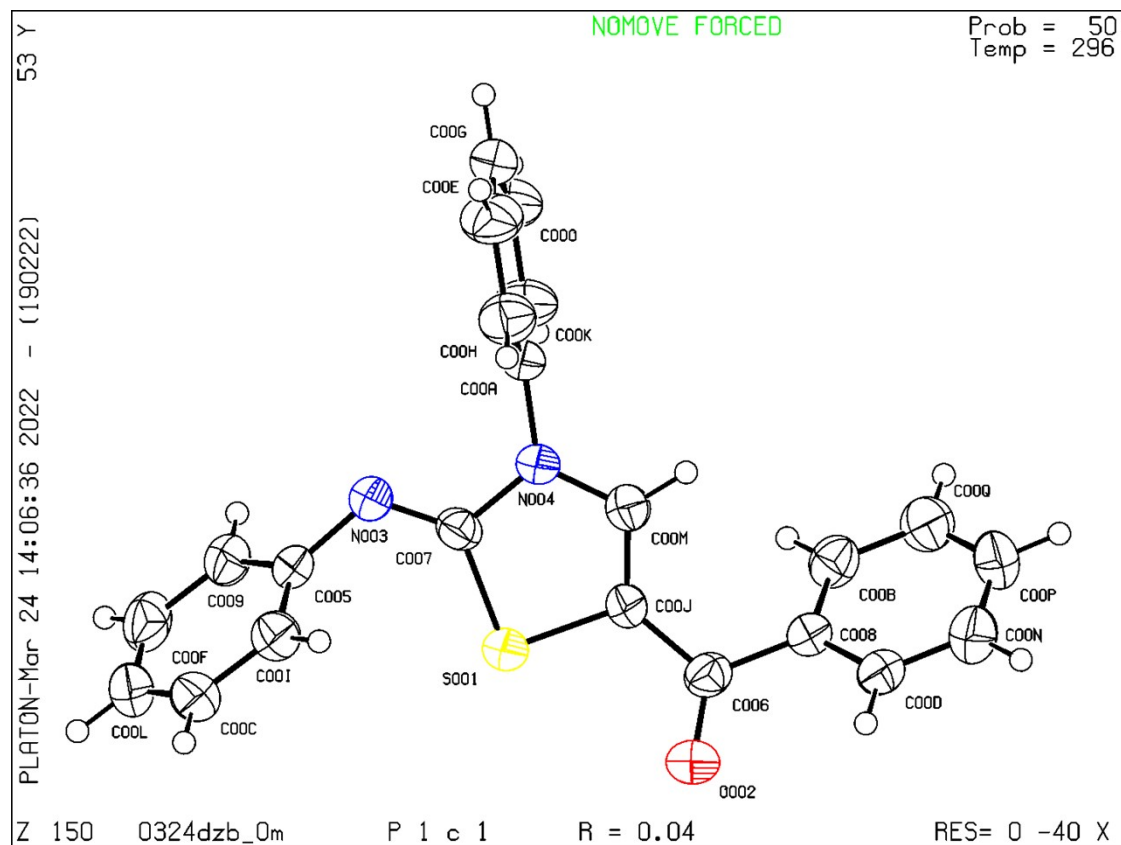

Figure S1. X-ray crystallography of product **3a**

---

Bond precision: C-C = 0.0077 Å Wavelength=0.71073

Cell: a=5.8239(14) b=15.770(4) c=9.954(3)  
alpha=90 beta=98.110(6) gamma=90

Temperature: 296 K

|                | Calculated     | Reported       |
|----------------|----------------|----------------|
| Volume         | 905.1(4)       | 905.0(4)       |
| Space group    | P c            | P 1 c 1        |
| Hall group     | P -2yc         | P -2yc         |
| Moiety formula | C22 H16 N2 O S | C22 H16 N2 O S |
| Sum formula    | C22 H16 N2 O S | C22 H16 N2 O S |
| Mr             | 356.43         | 356.43         |
| Dx,g cm-3      | 1.308          | 1.308          |
| Z              | 2              | 2              |
| Mu (mm-1)      | 0.192          | 0.192          |
| F000           | 372.0          | 372.0          |
| F000'          | 372.38         |                |
| h,k,lmax       | 6,18,11        | 6,18,11        |
| Nref           | 3196[ 1607]    | 2760           |
| Tmin,Tmax      |                | 0.669,0.745    |
| Tmin'          |                |                |

Correction method= # Reported T Limits: Tmin=0.669 Tmax=0.745 AbsCorr = NONE

Data completeness= 1.72/0.86

Theta(max)= 25.046

R(reflections)= 0.0436( 2037)

wR2(reflections)=  
0.0886( 2760)

S = 1.076

Npar= 235

---

## 5. $^1\text{H}$ NMR and $^{13}\text{C}$ NMR Spectra of 3a-3ah

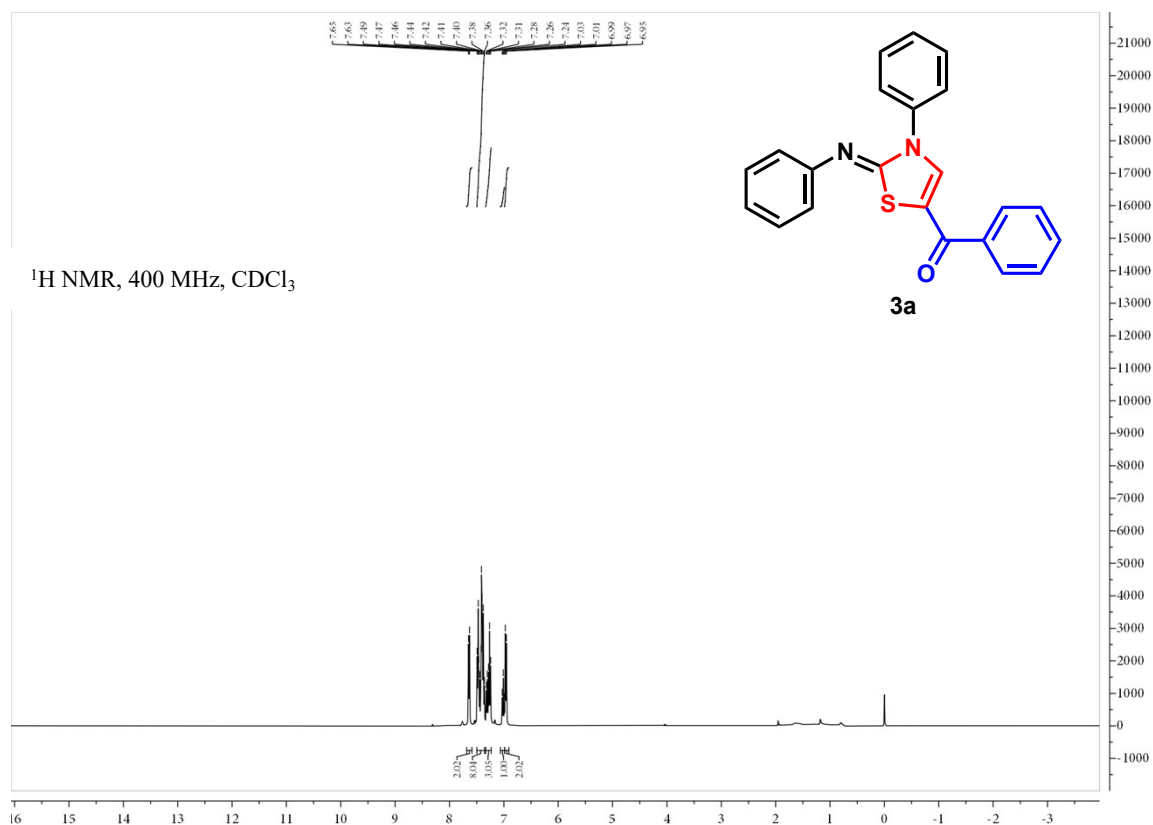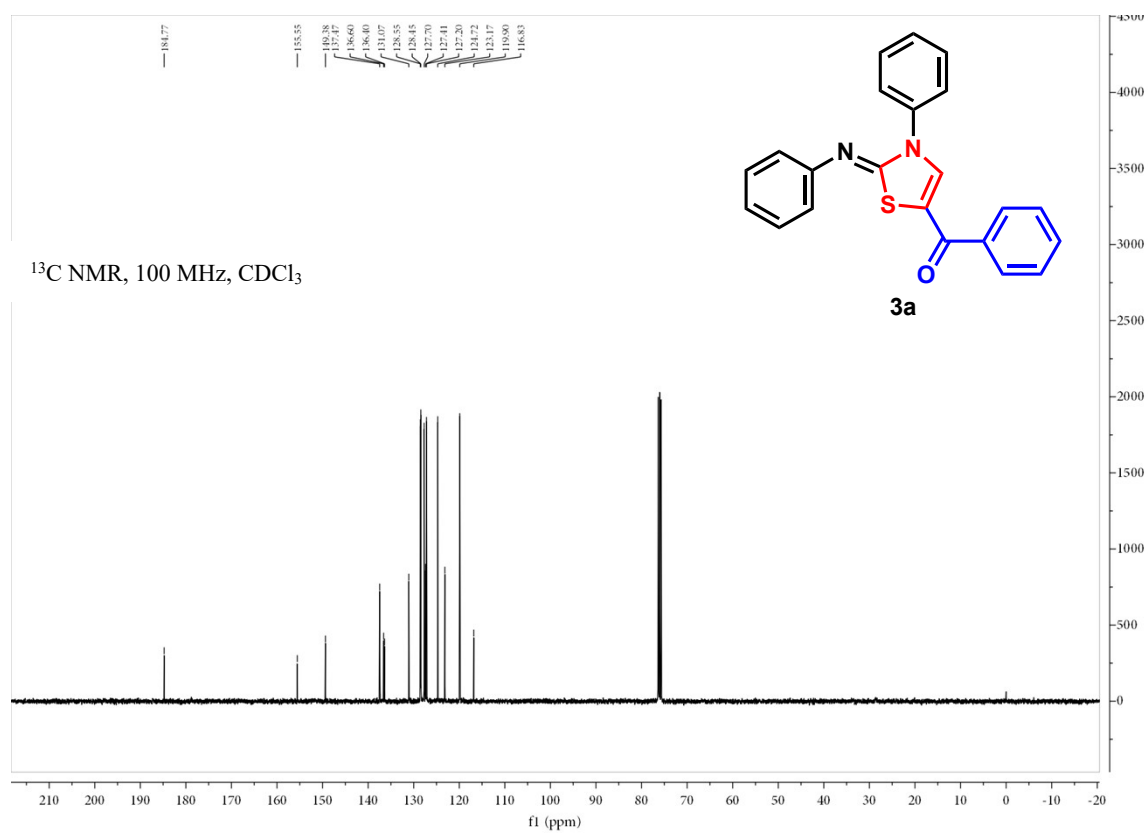



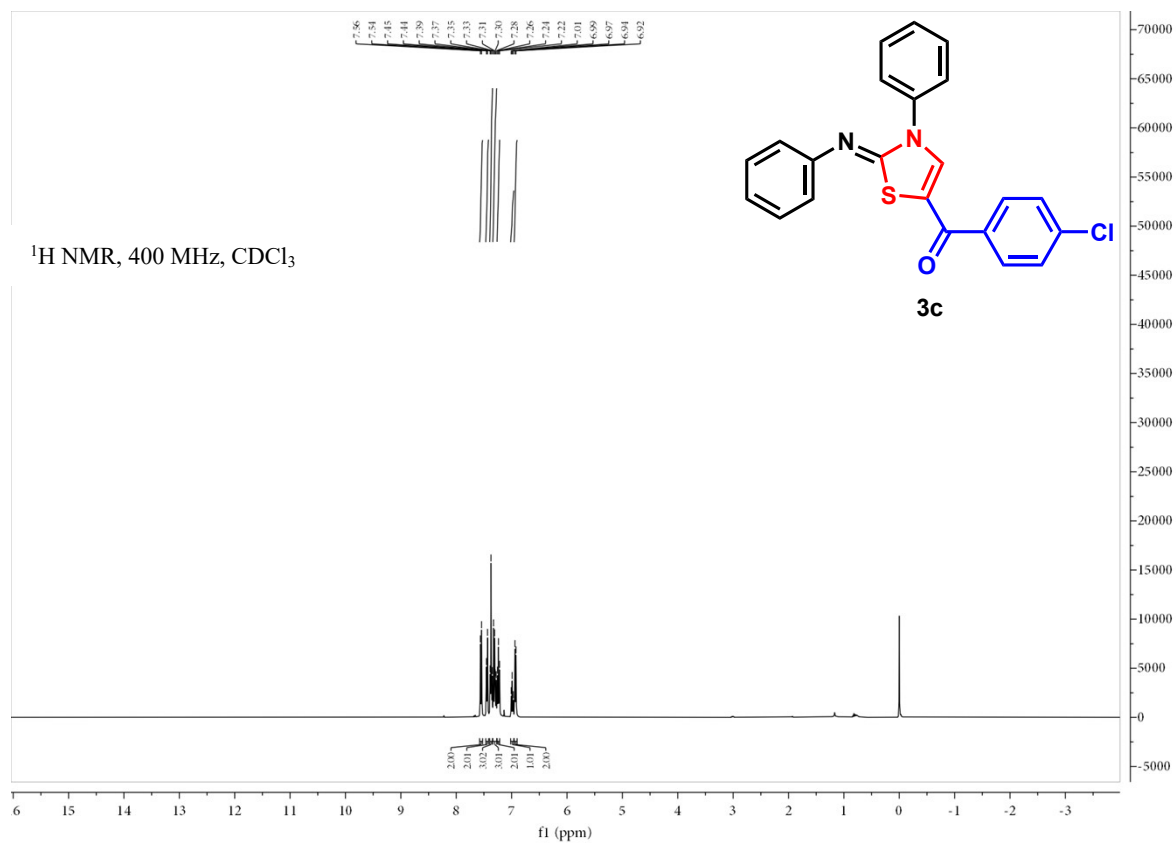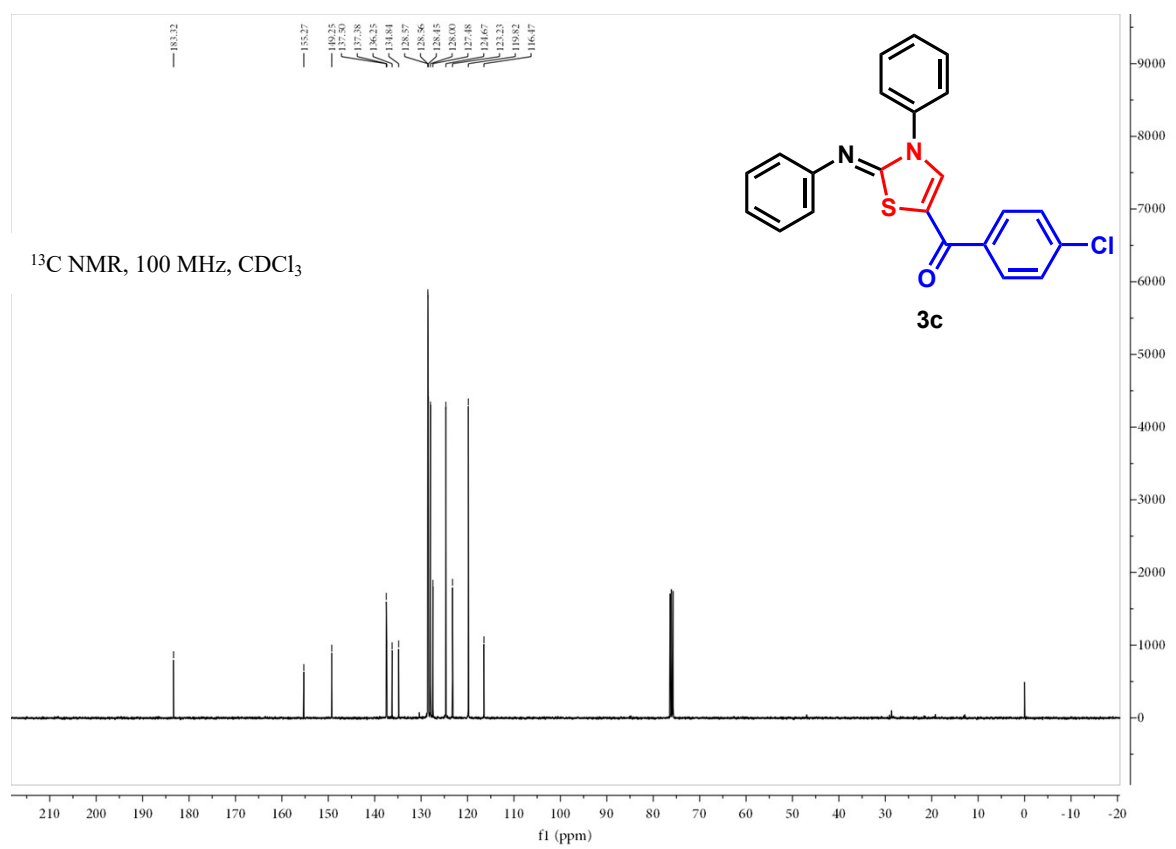

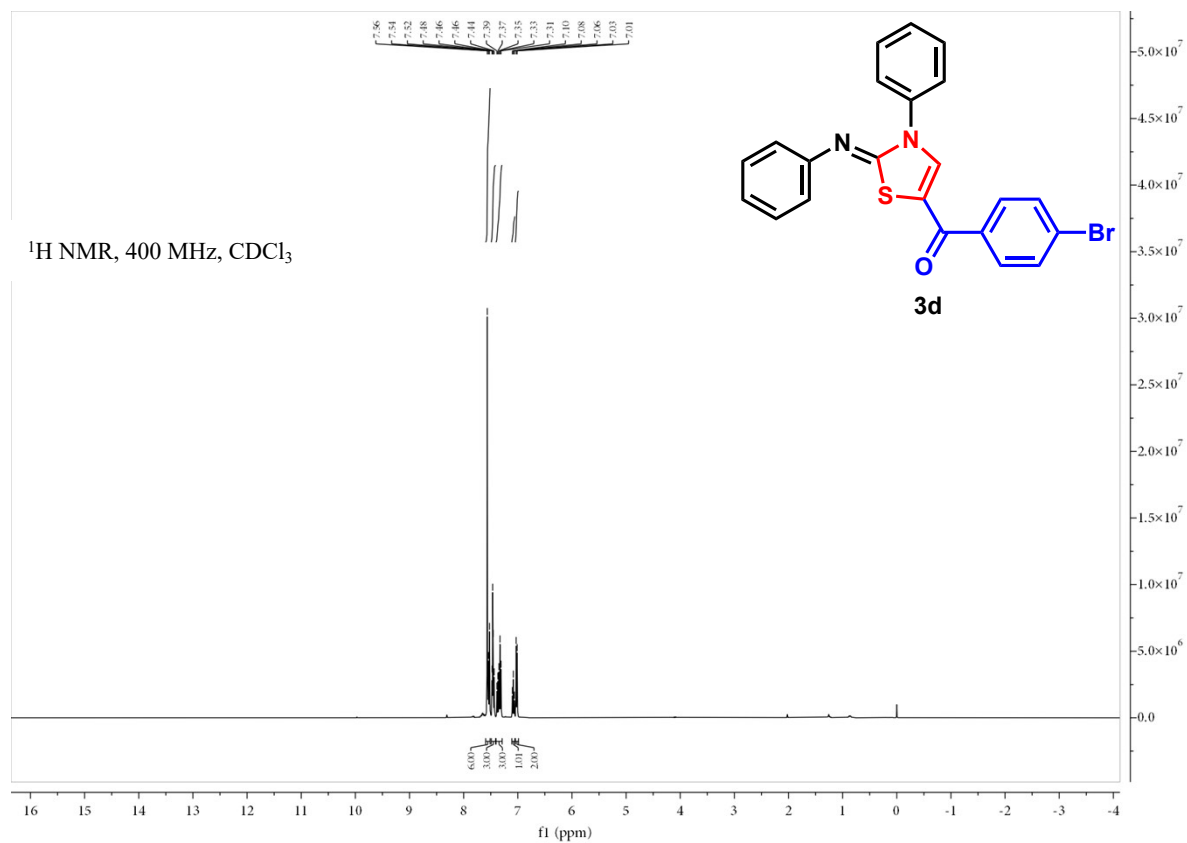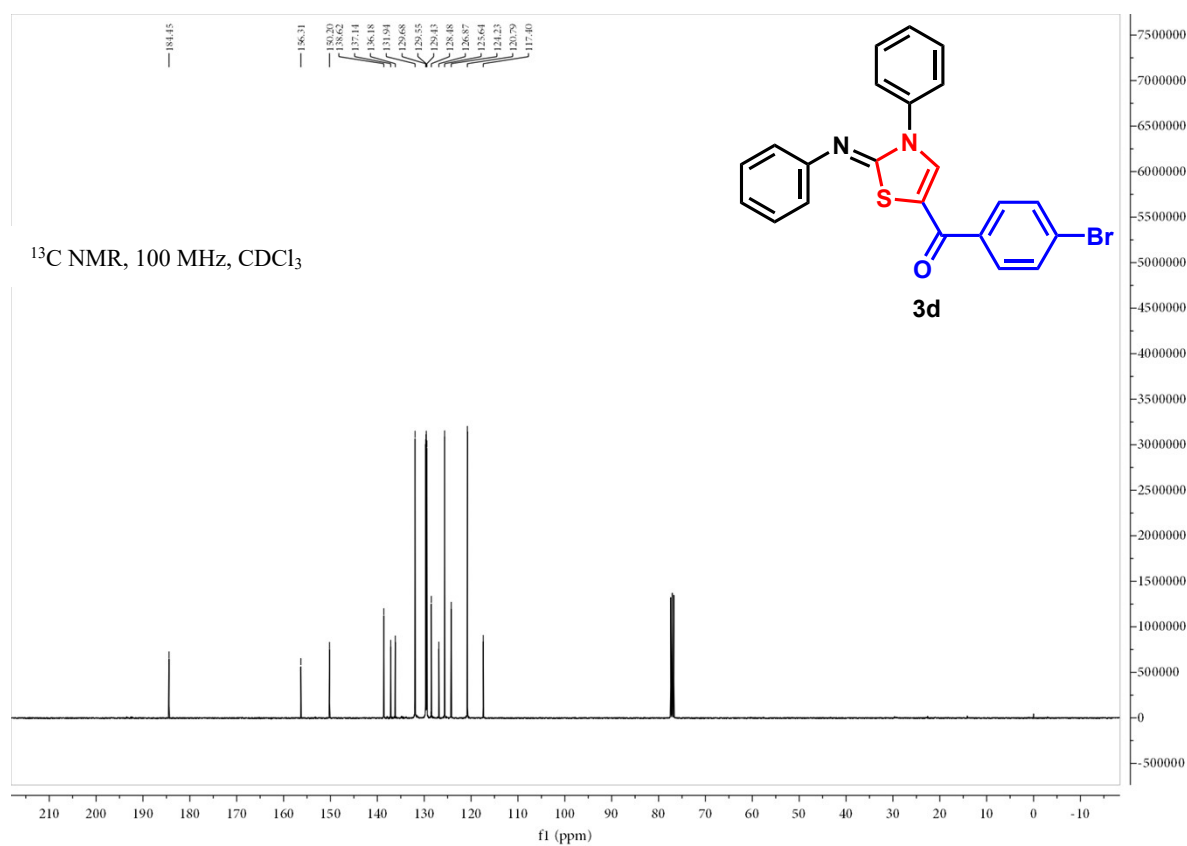

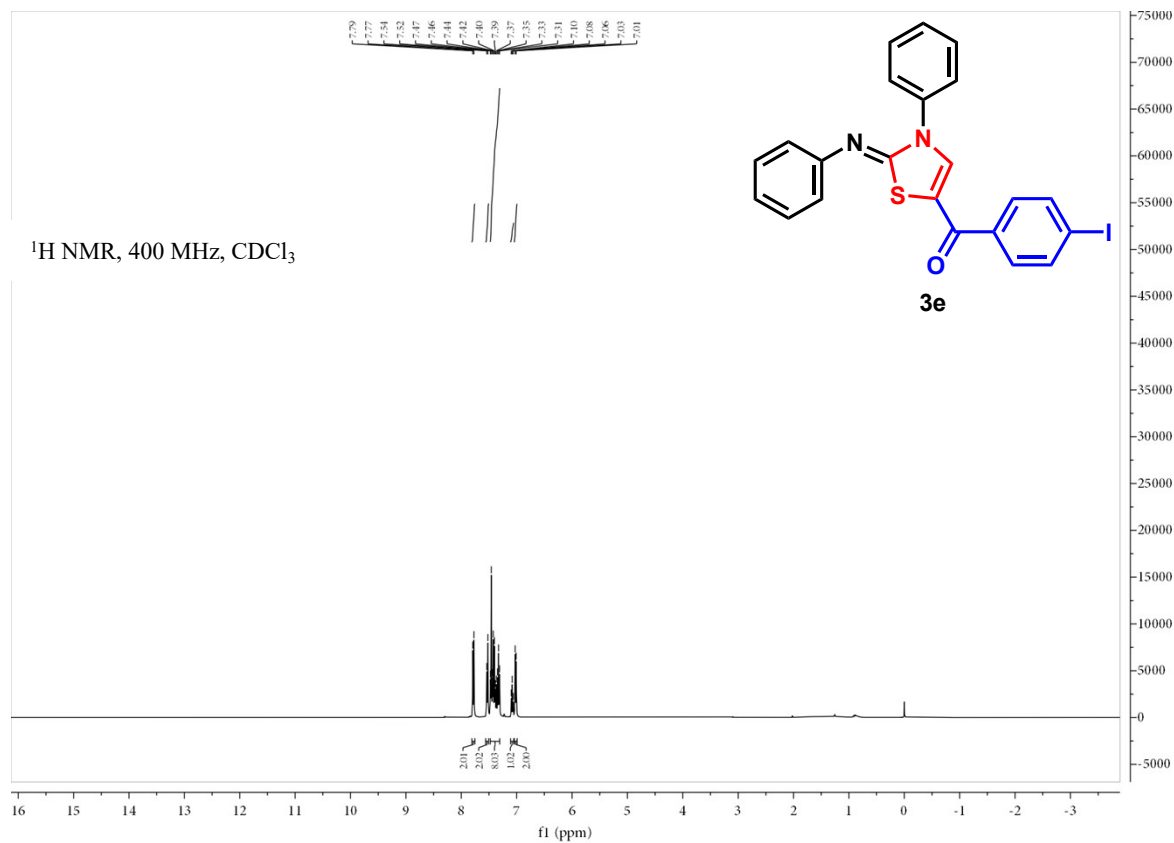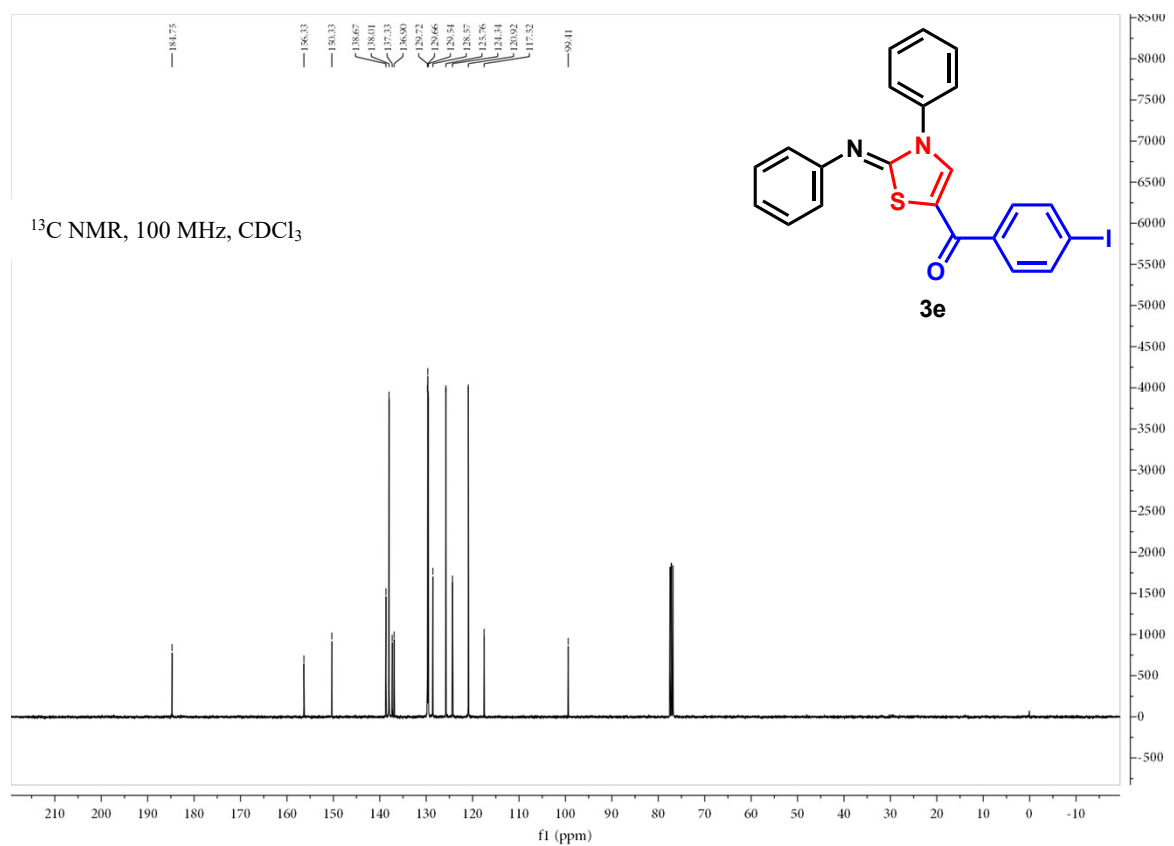



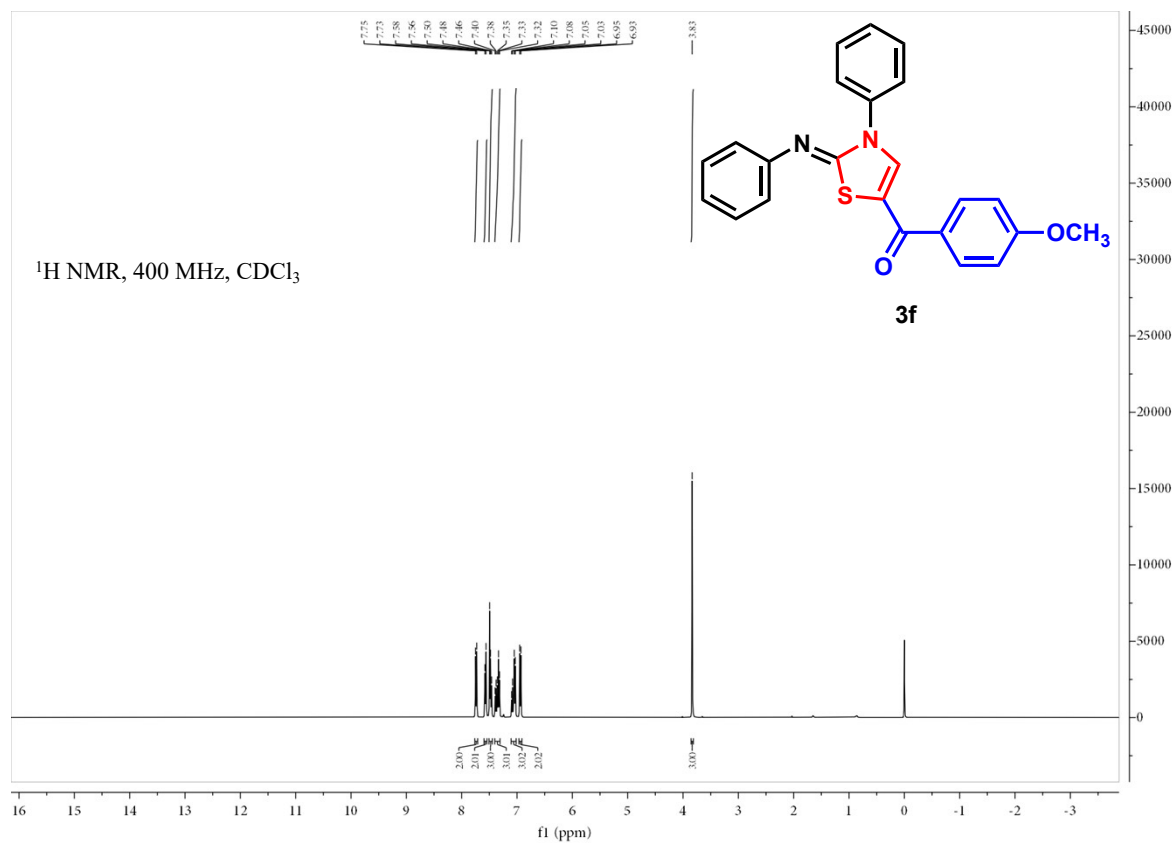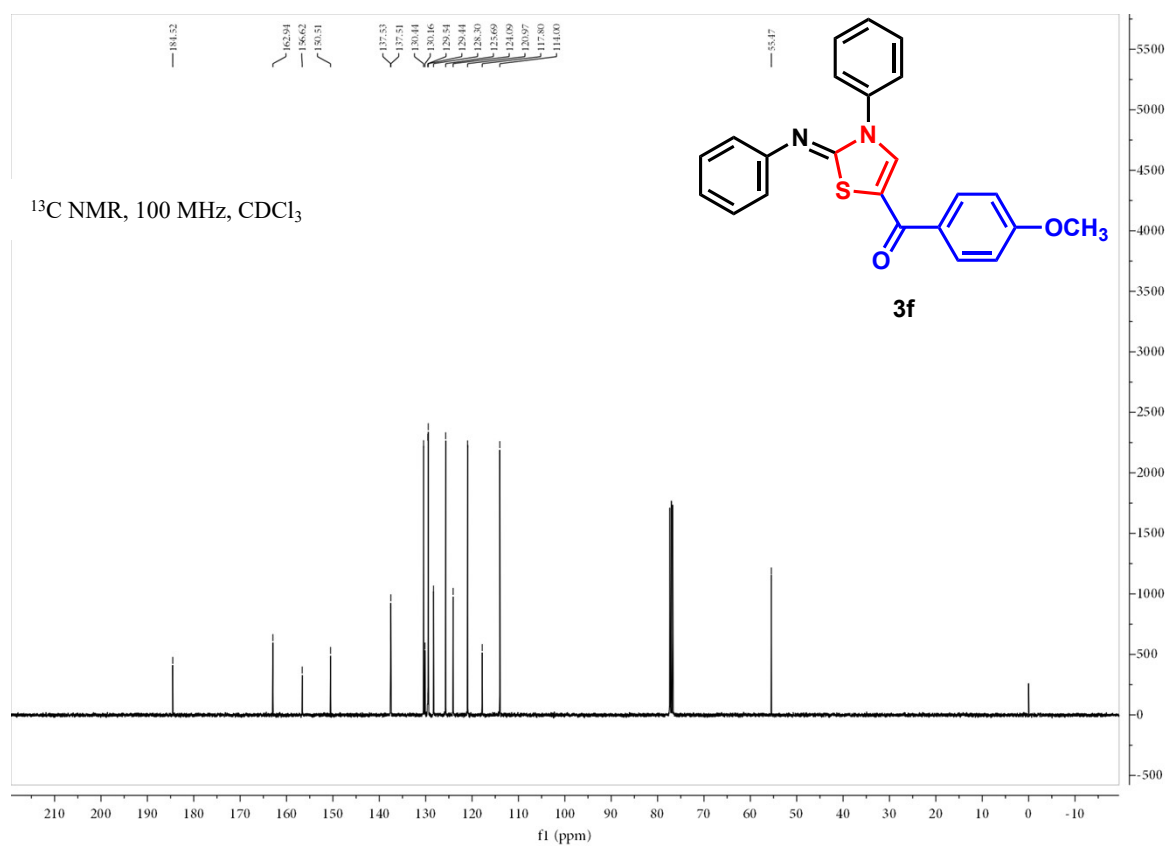

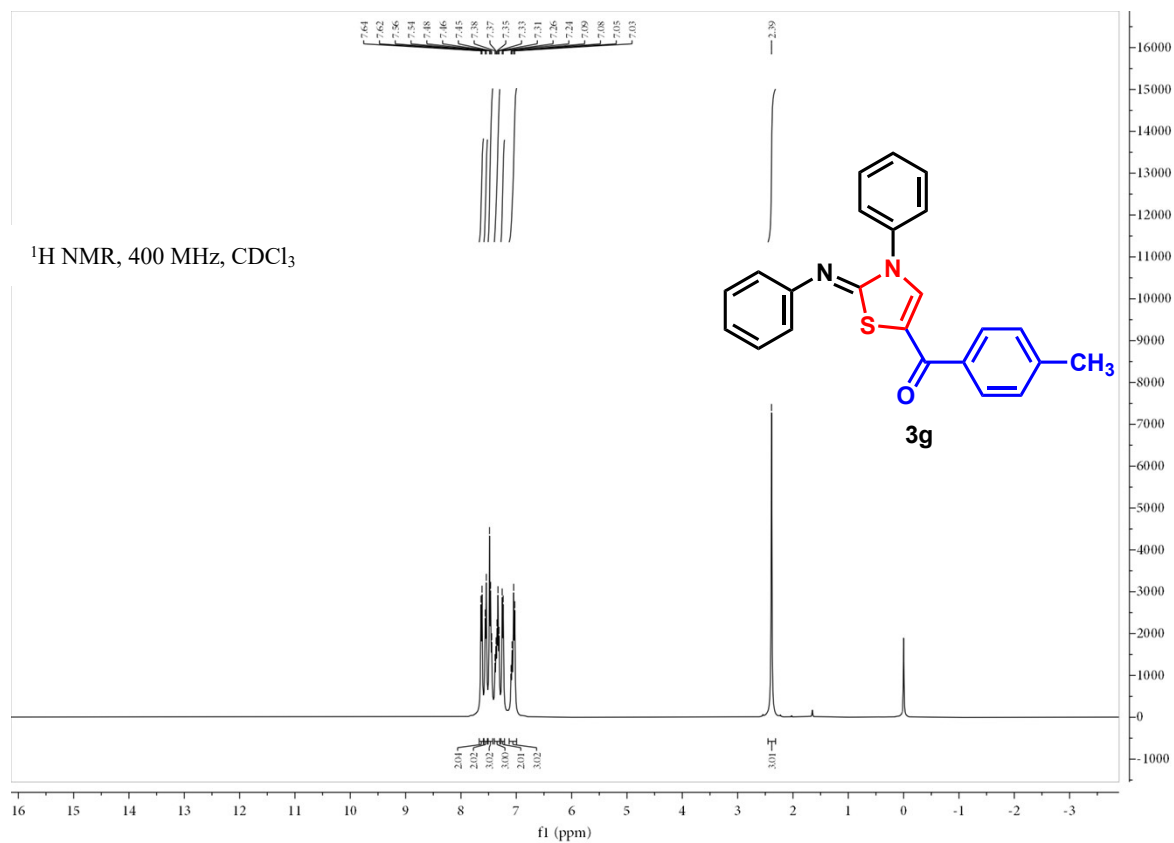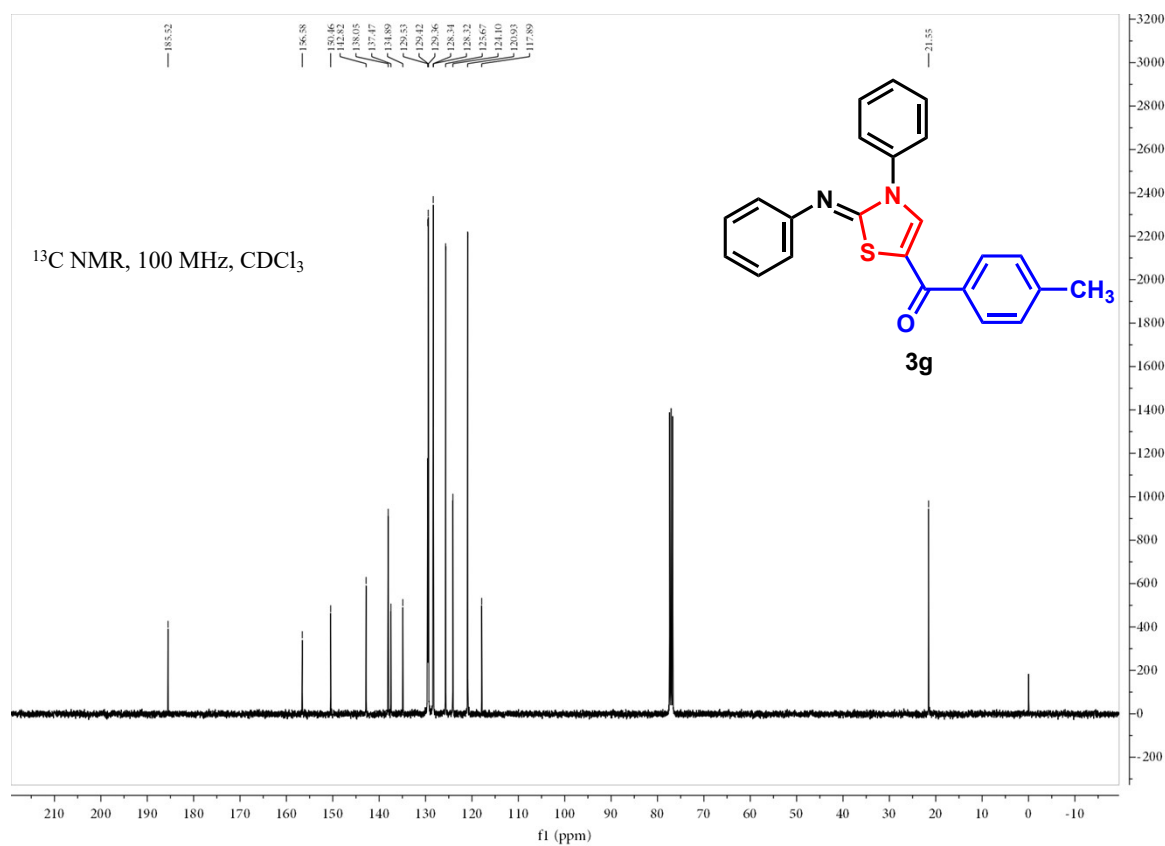

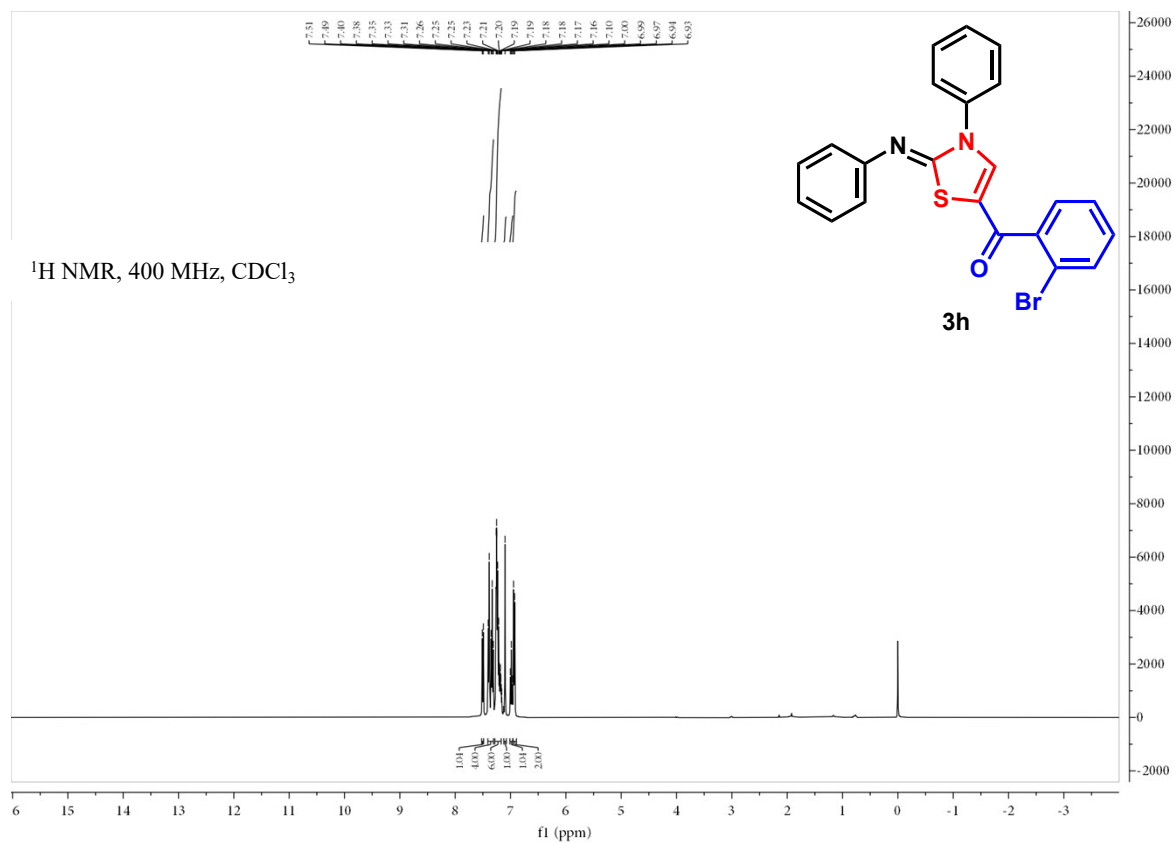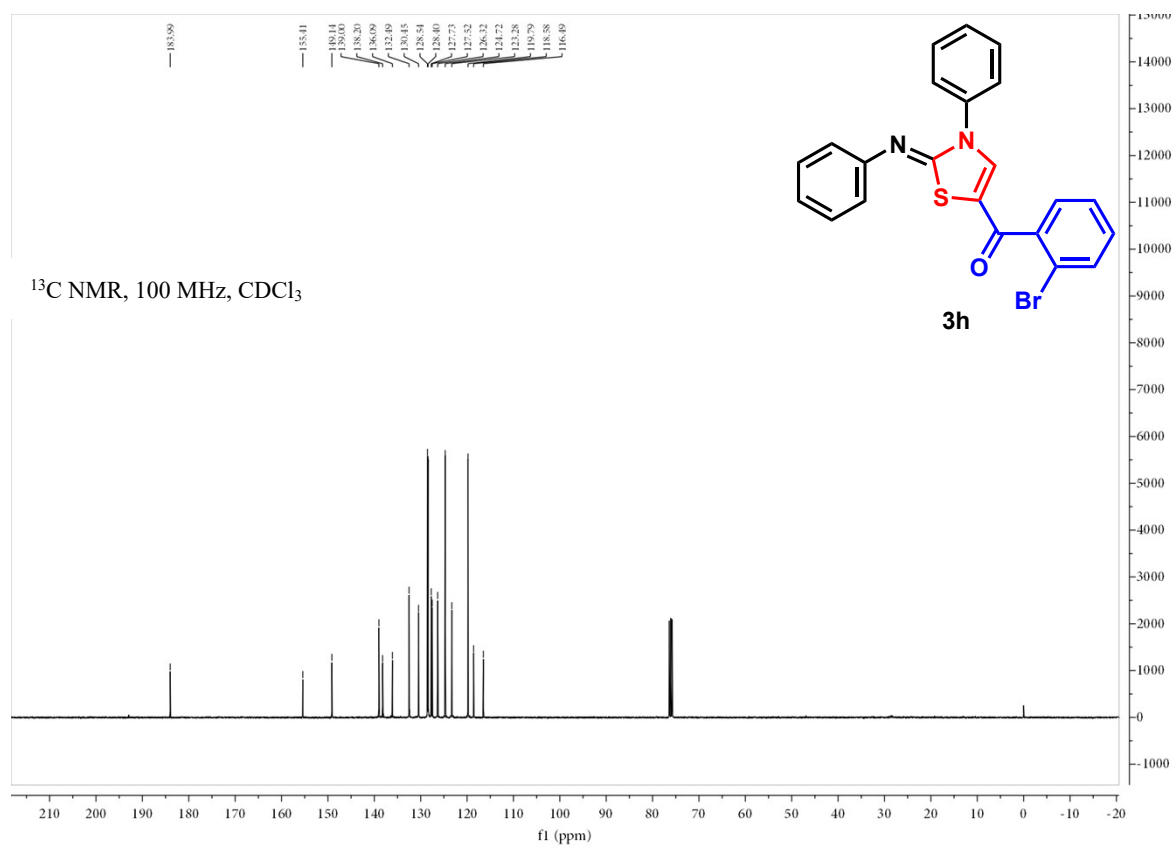



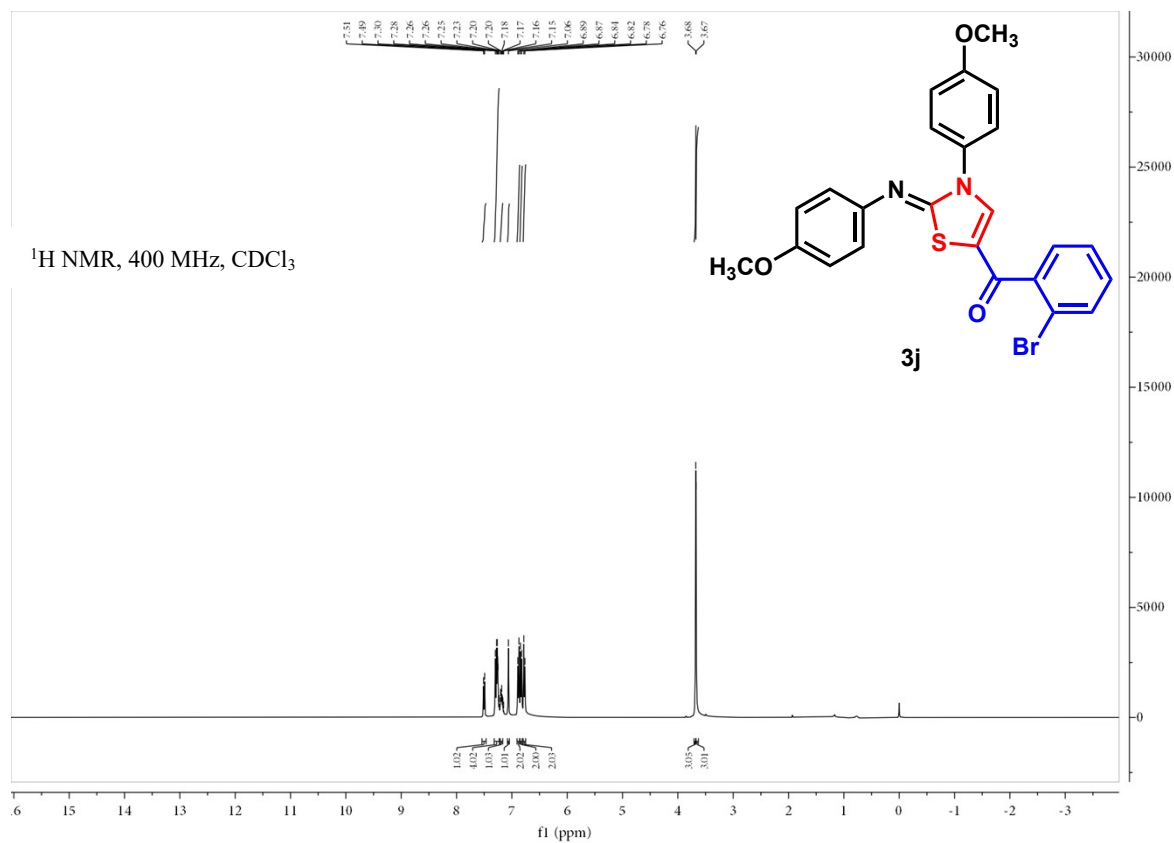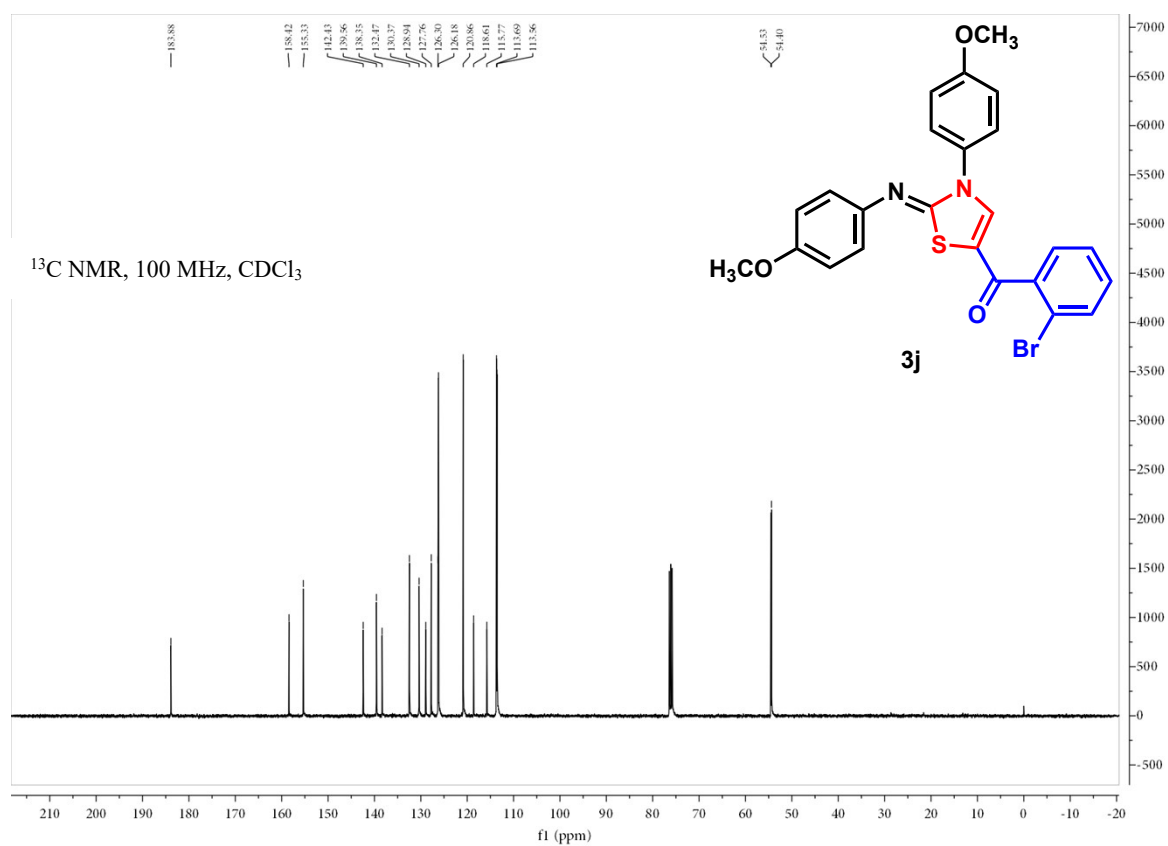

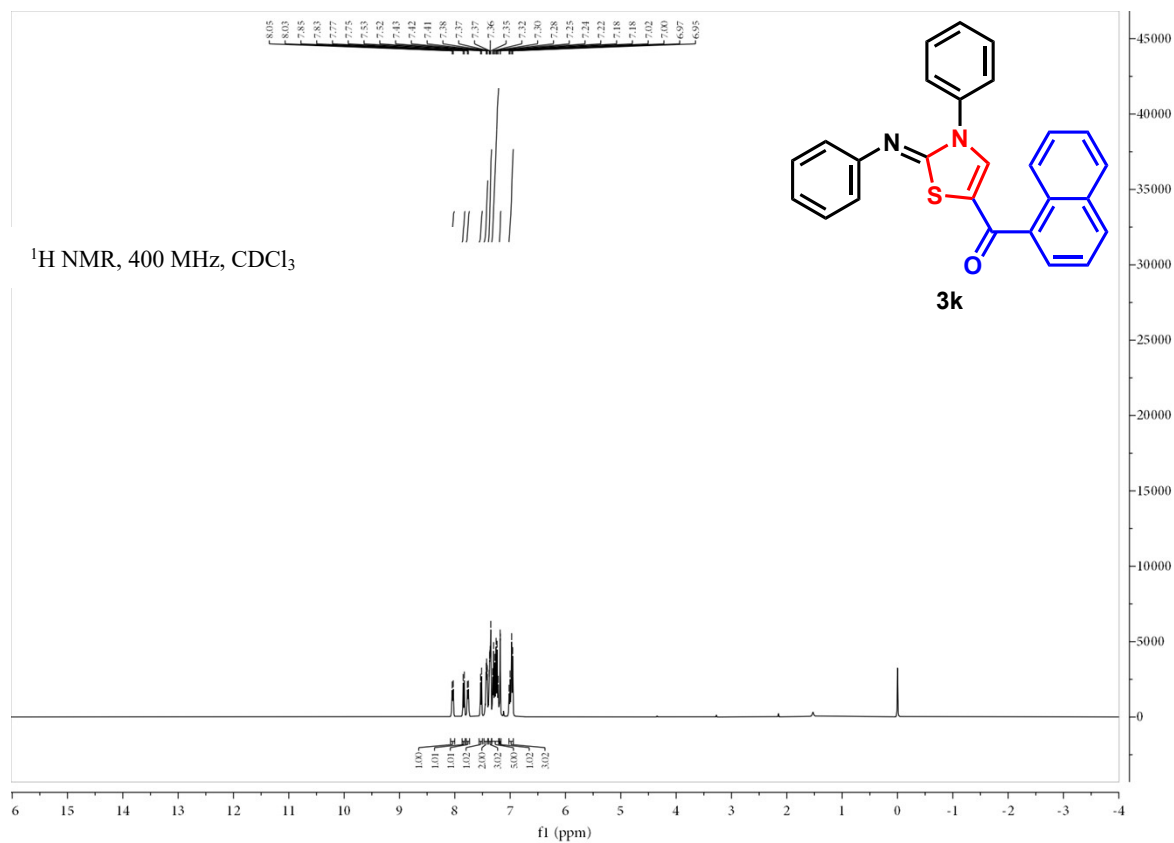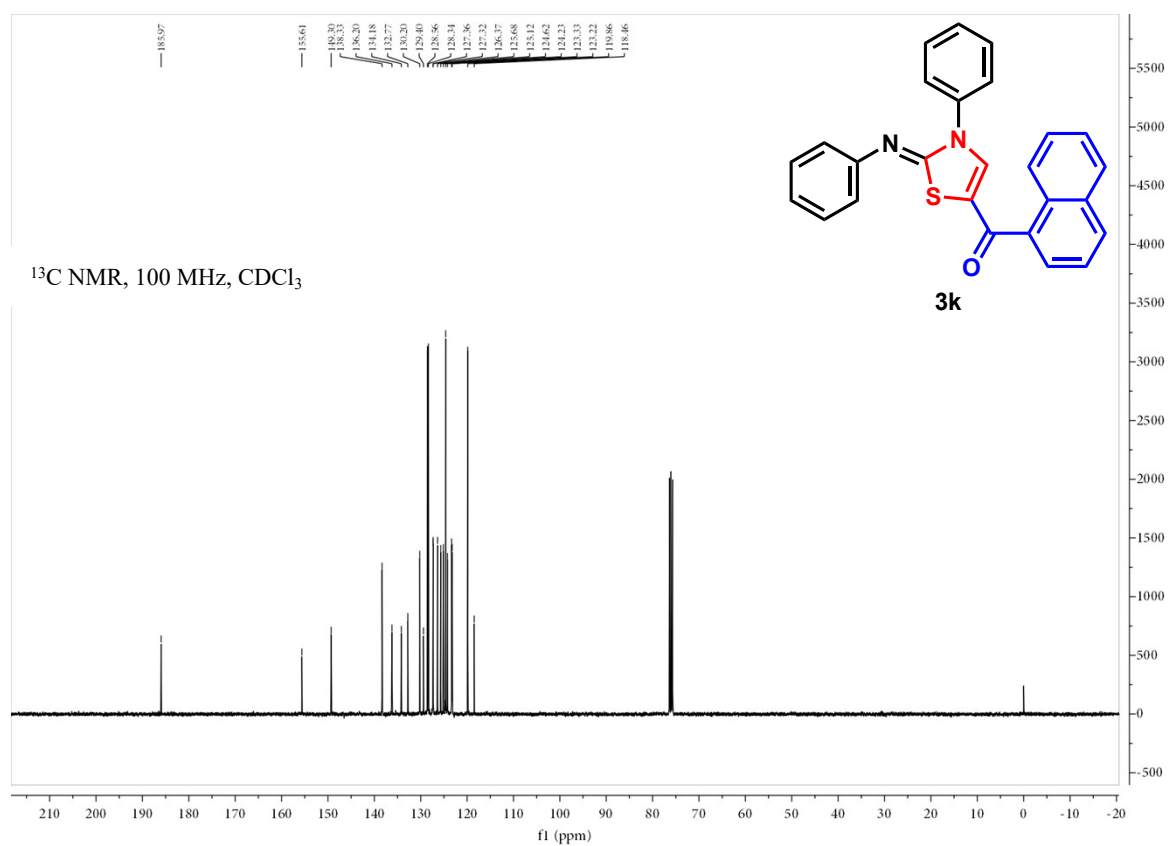

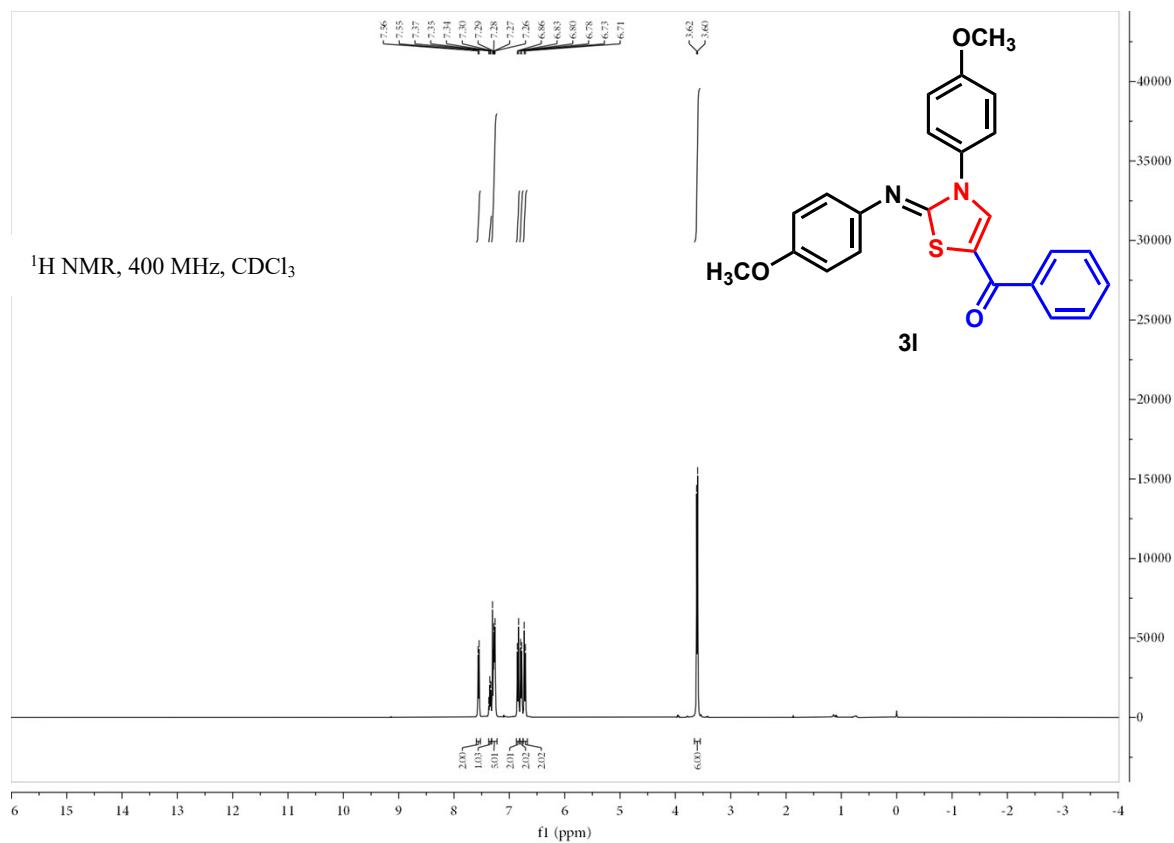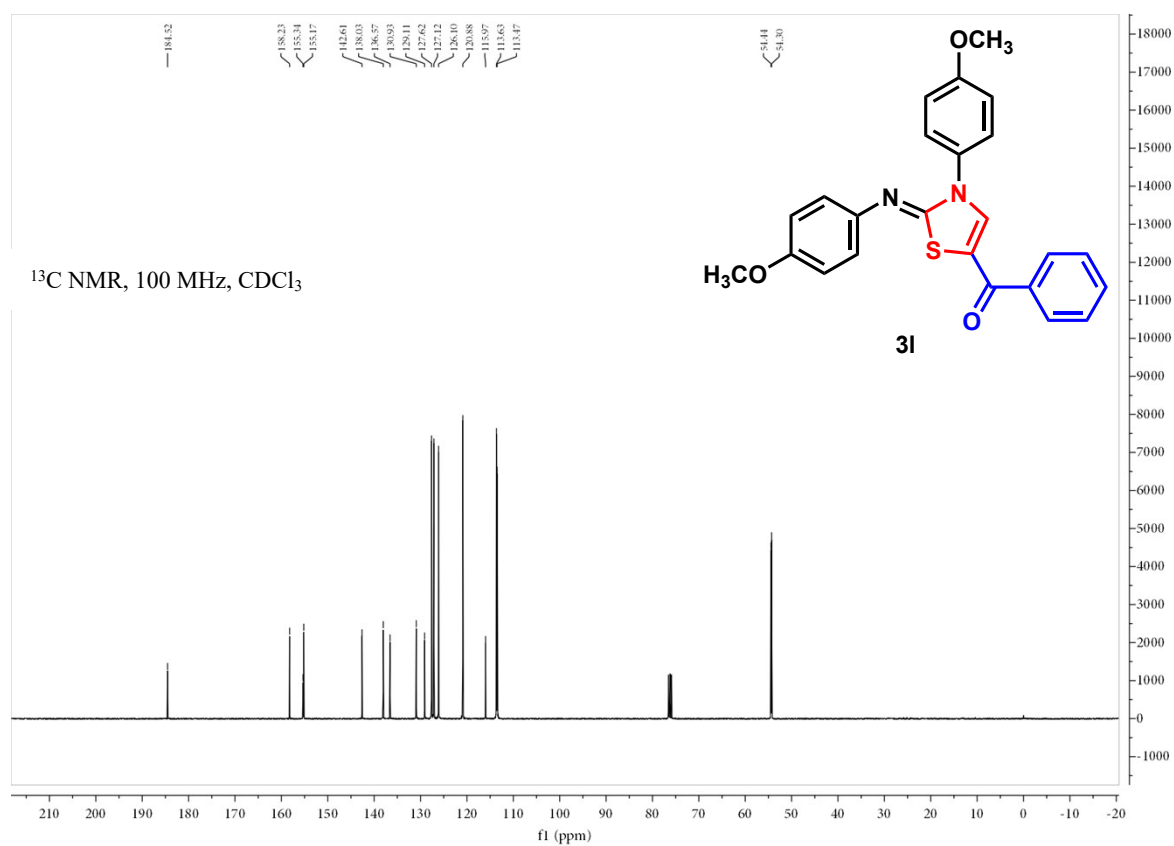

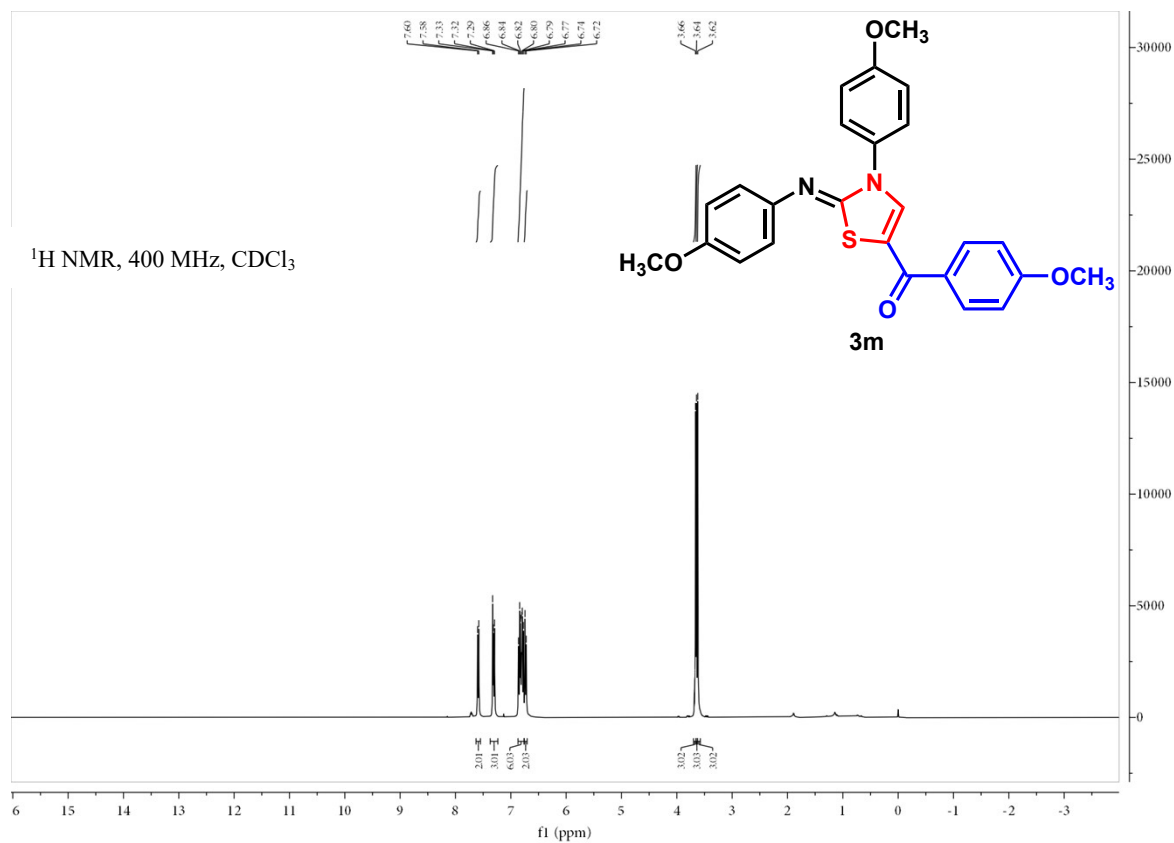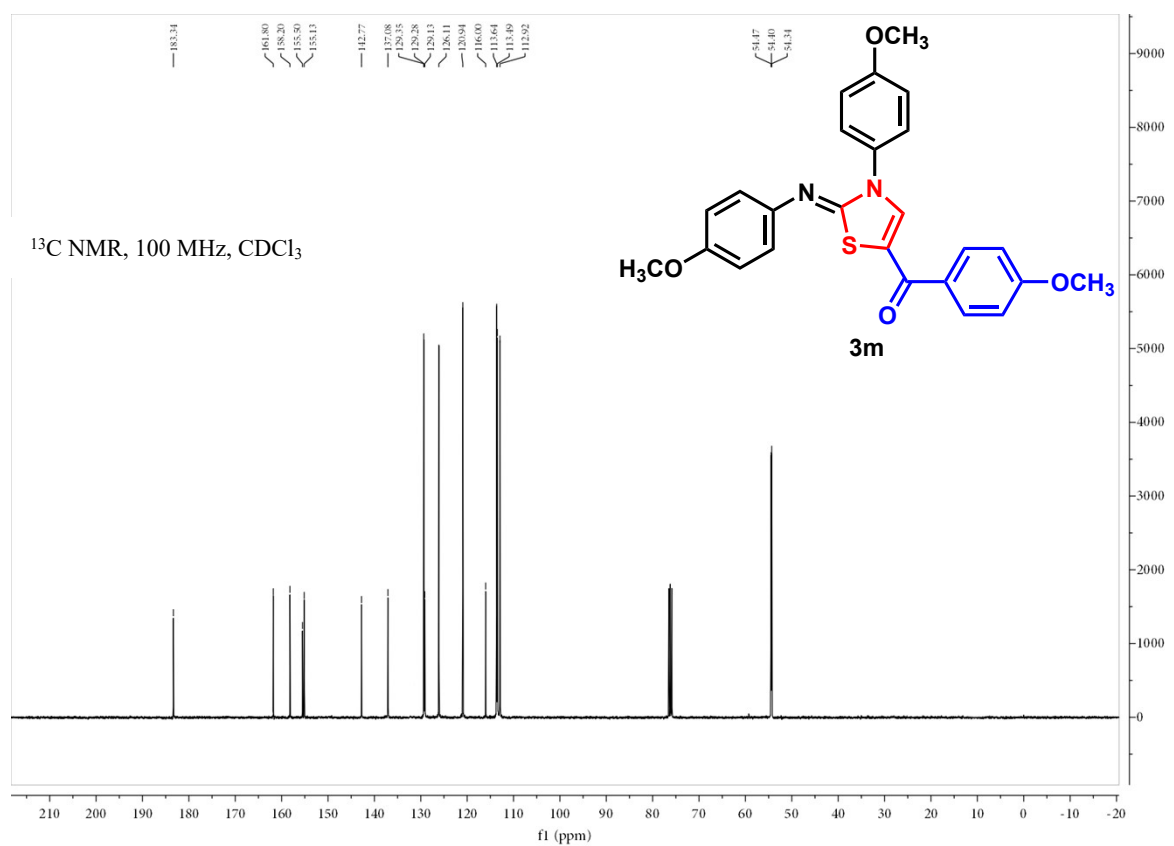





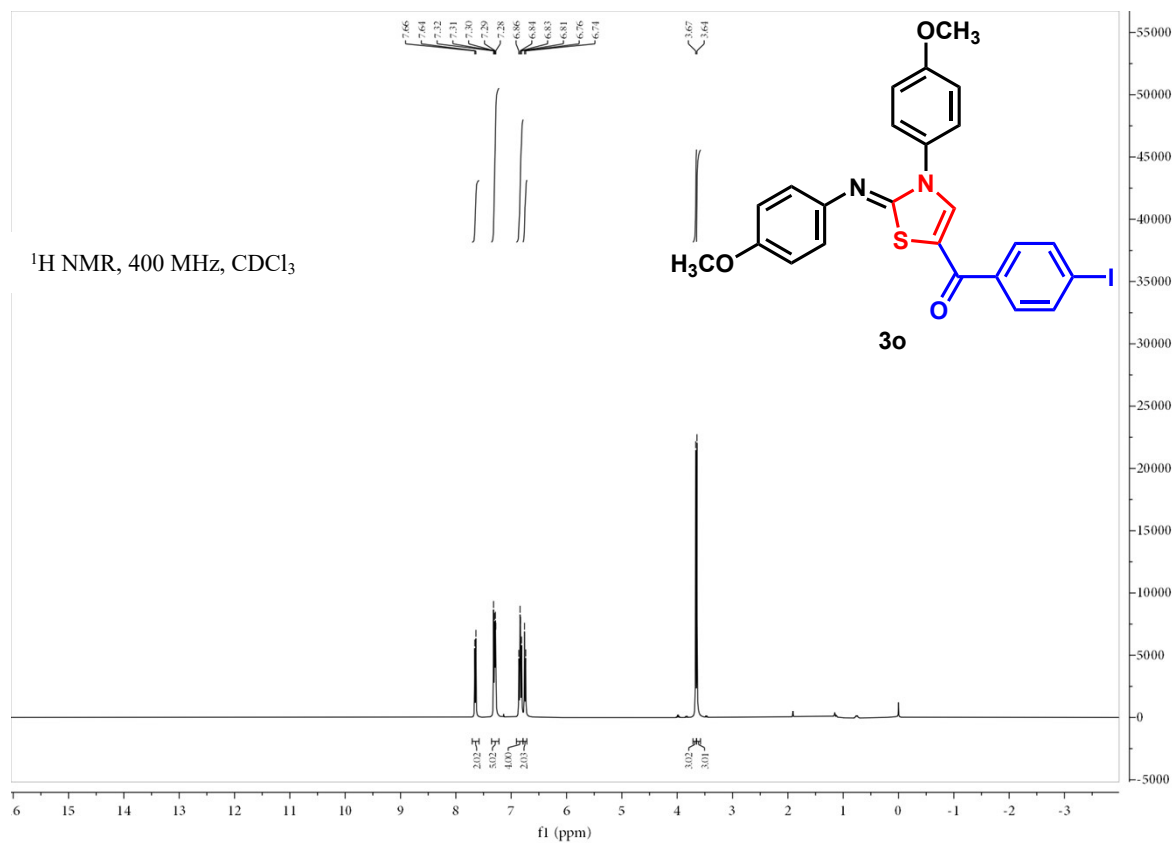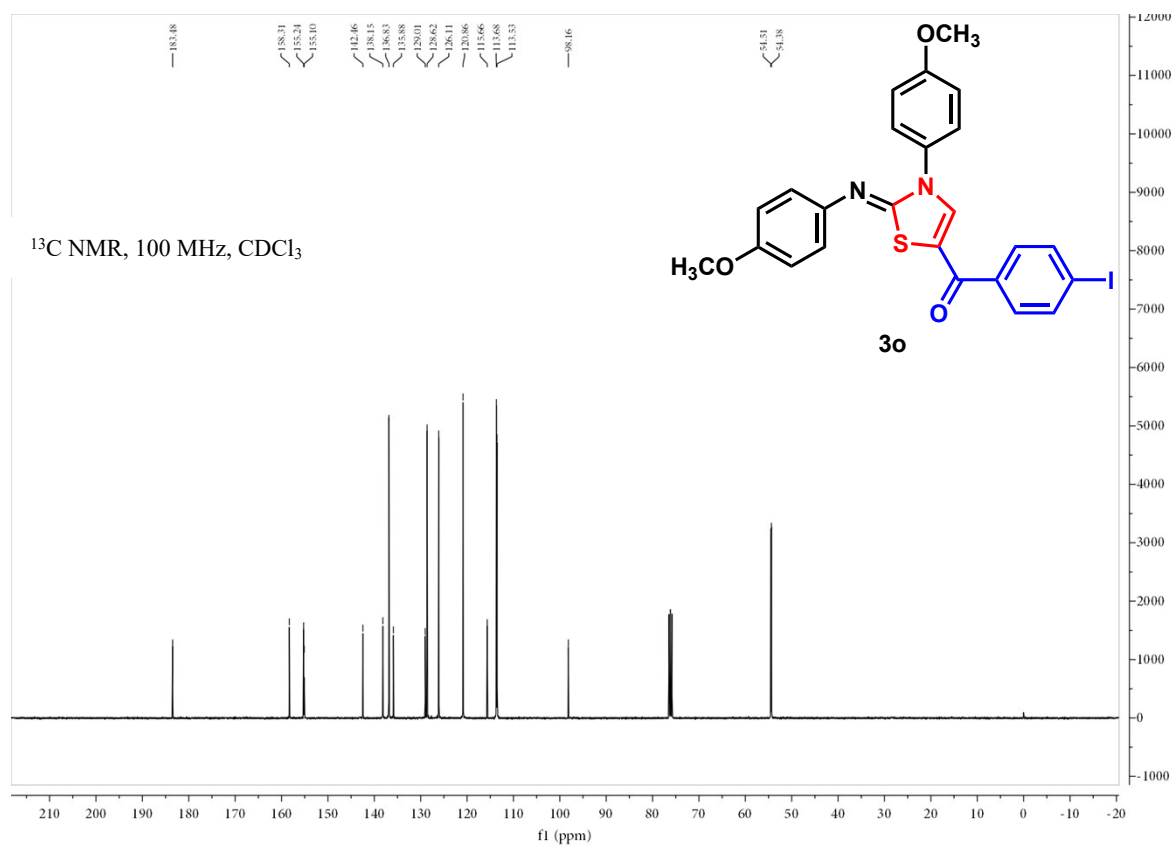

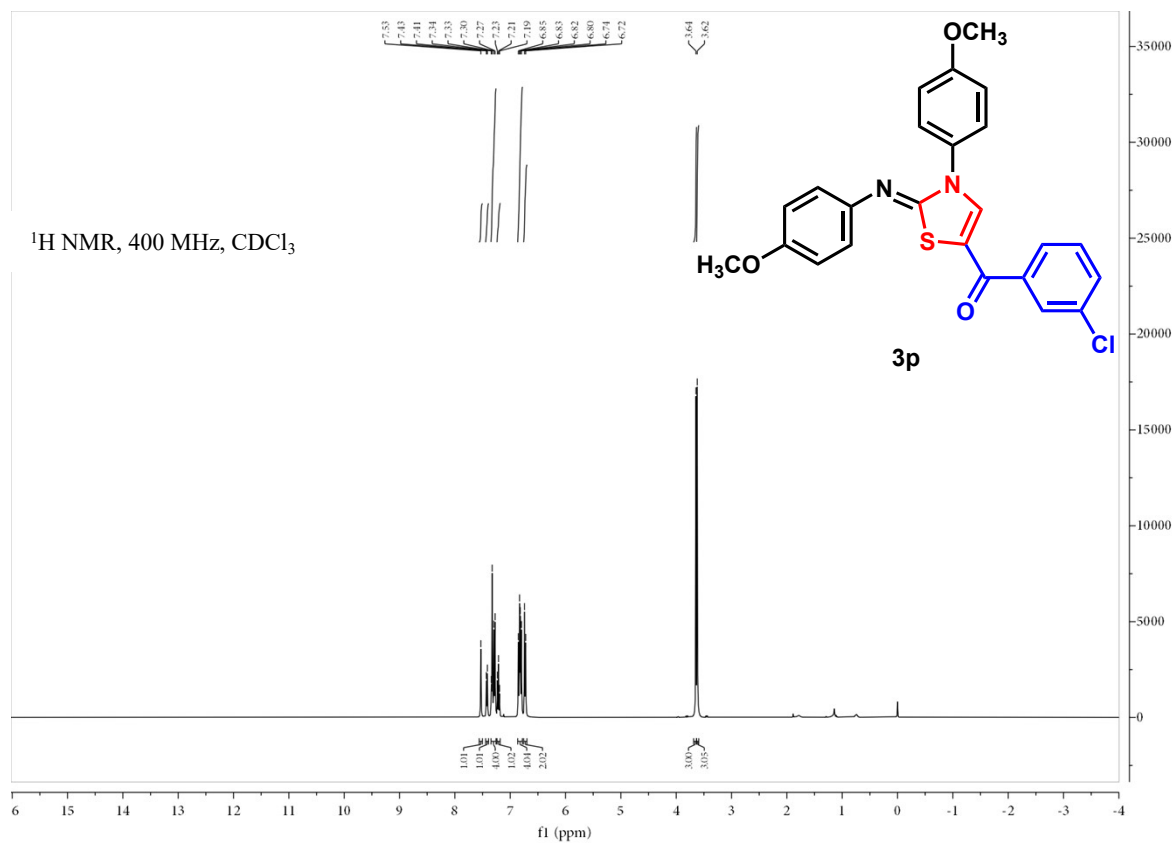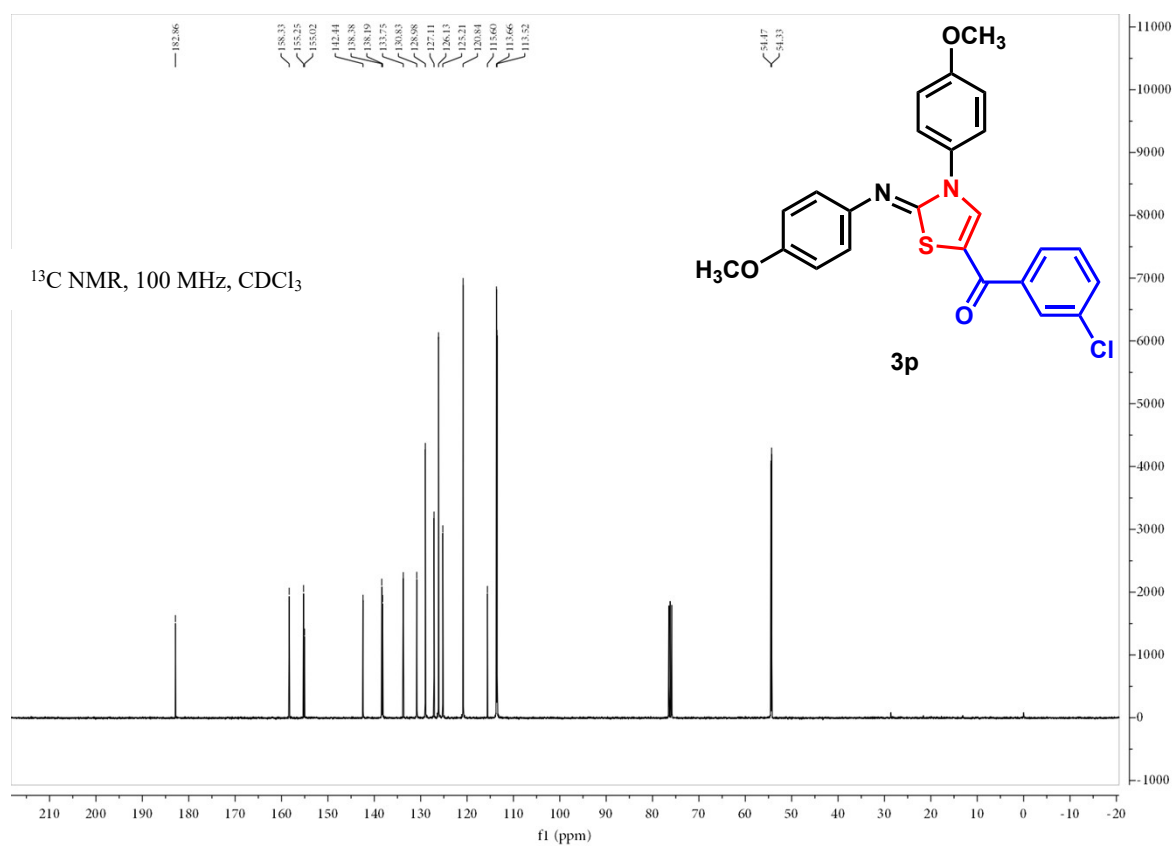

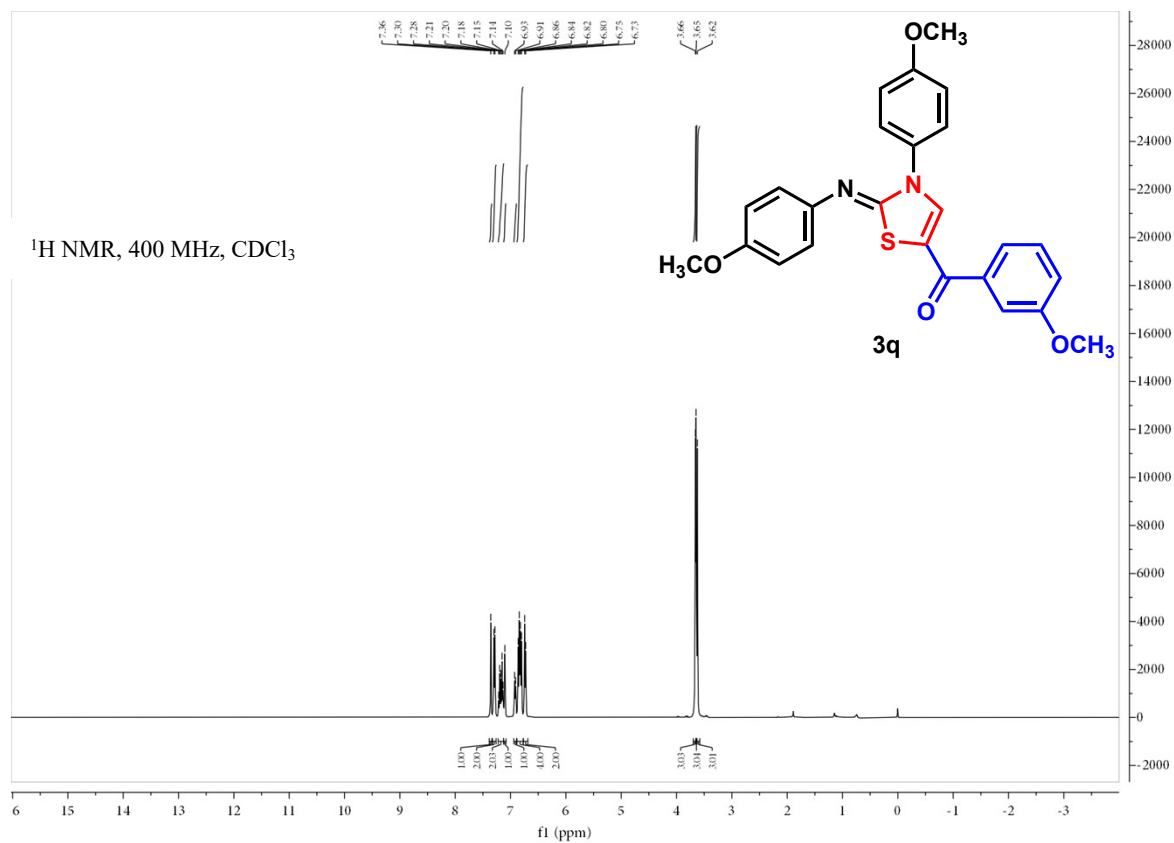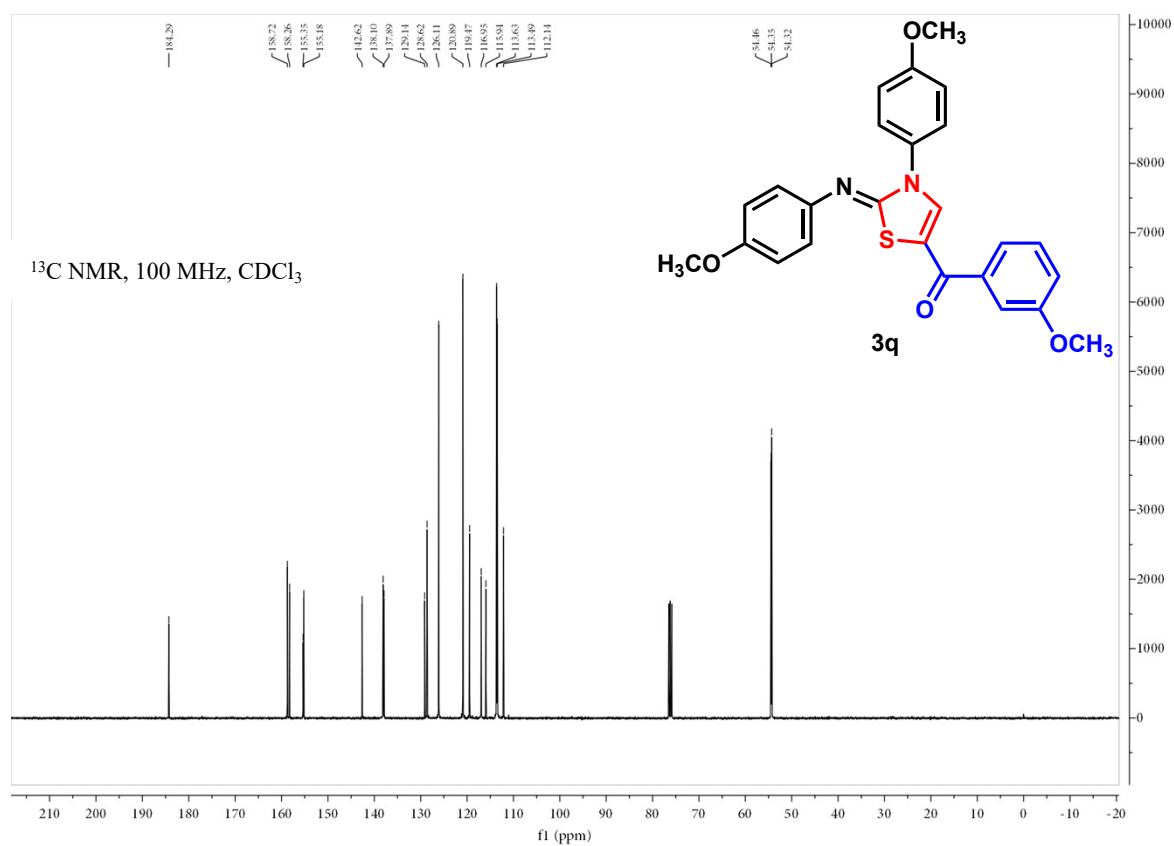

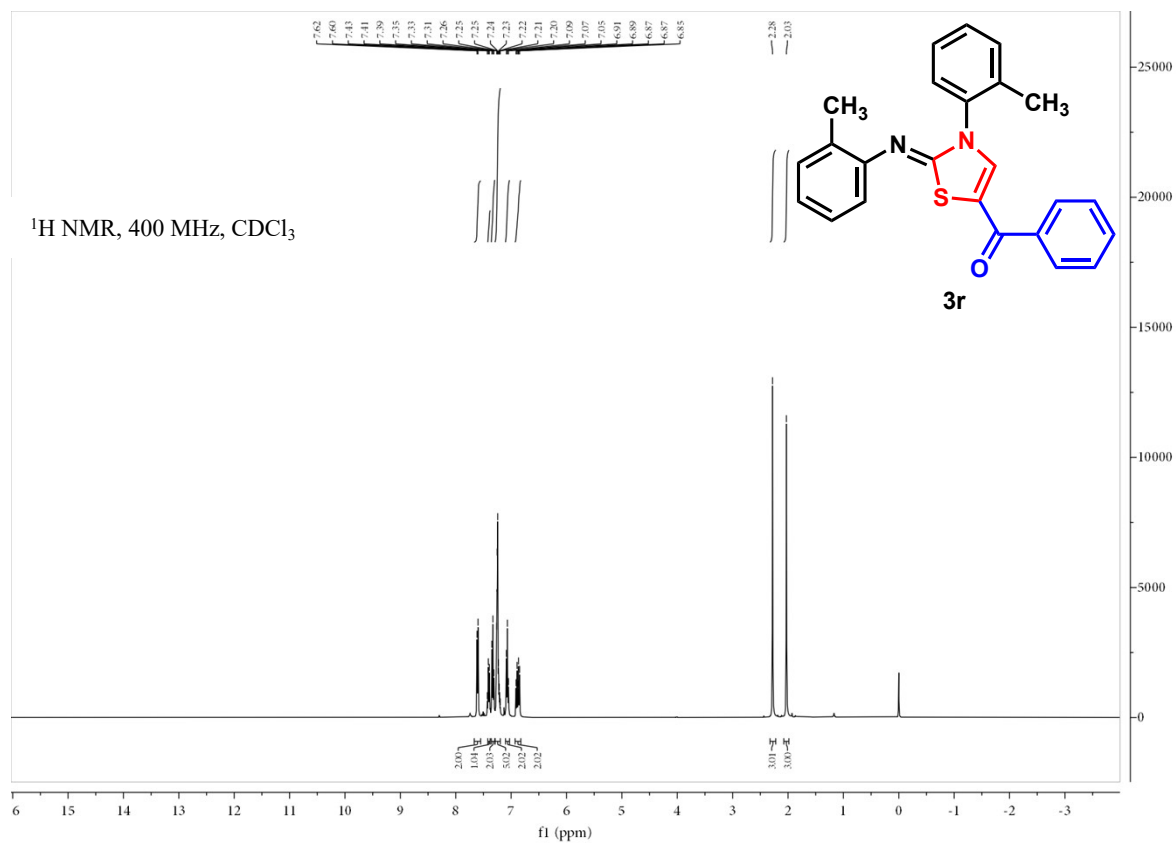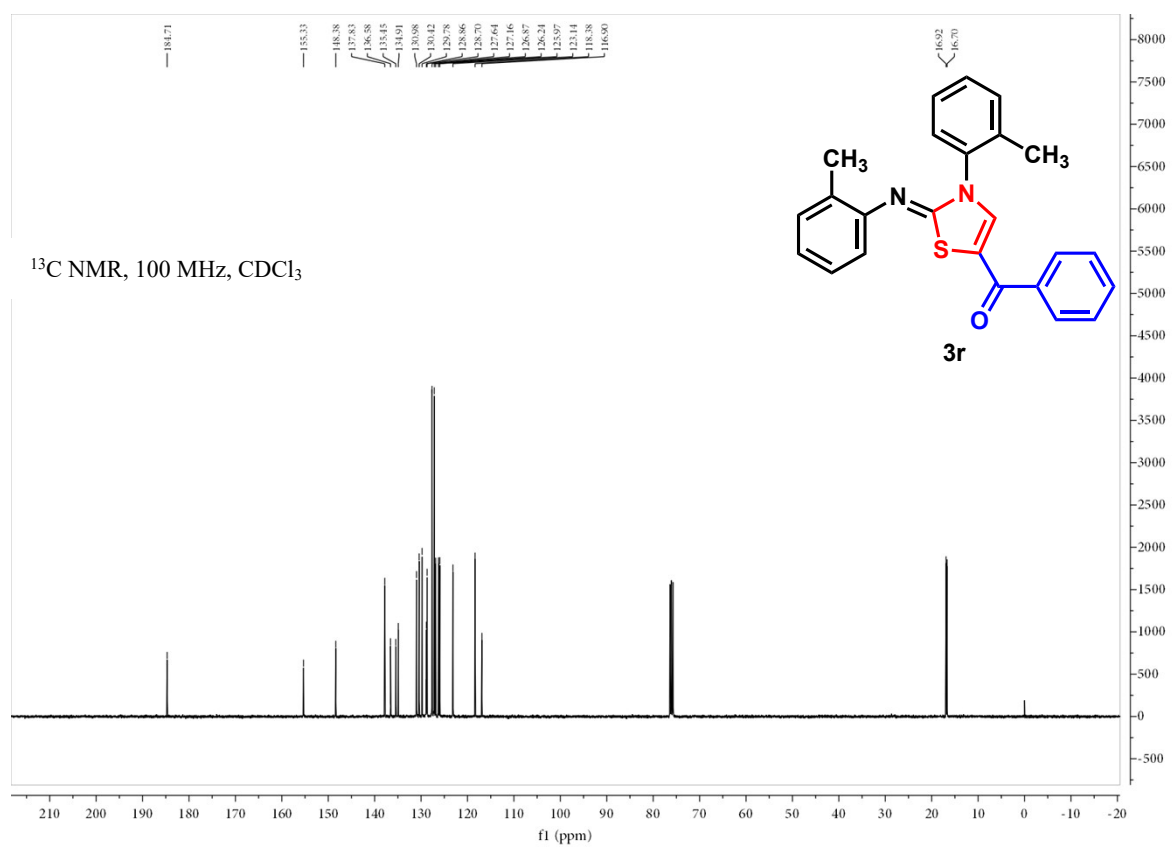

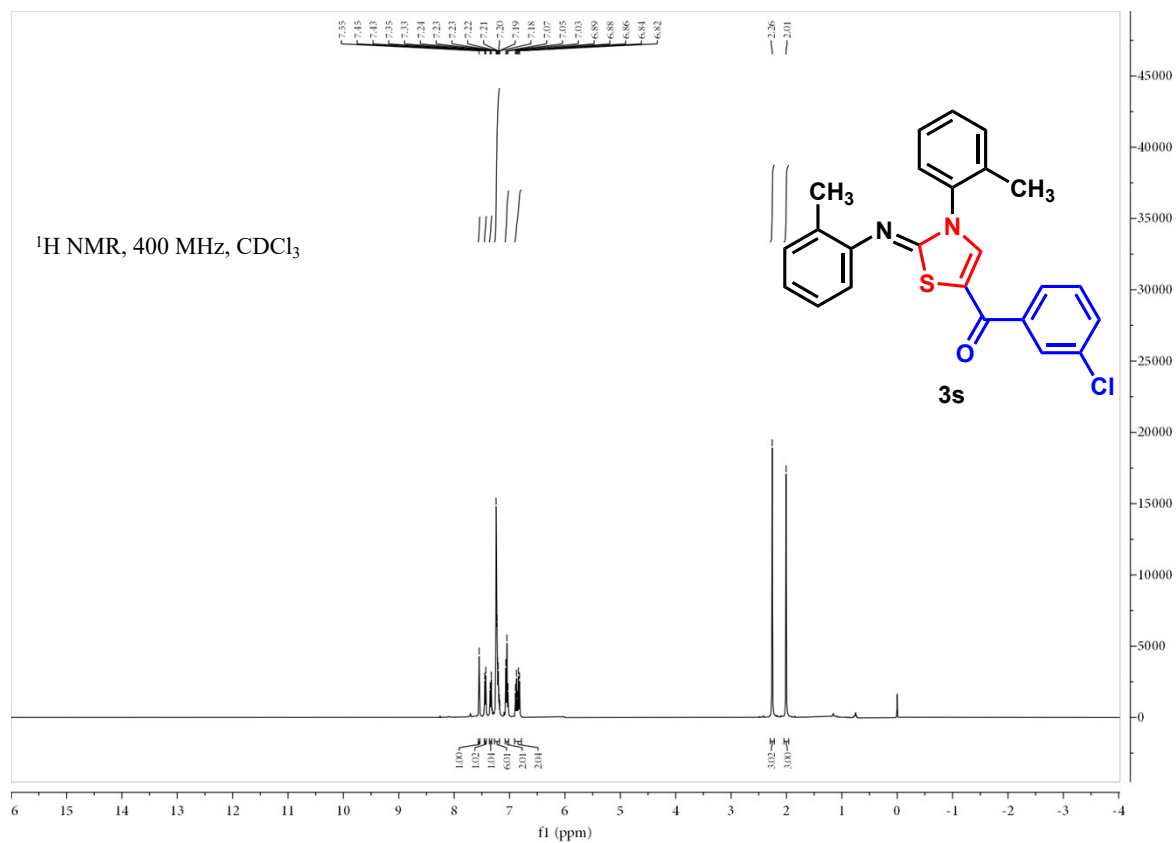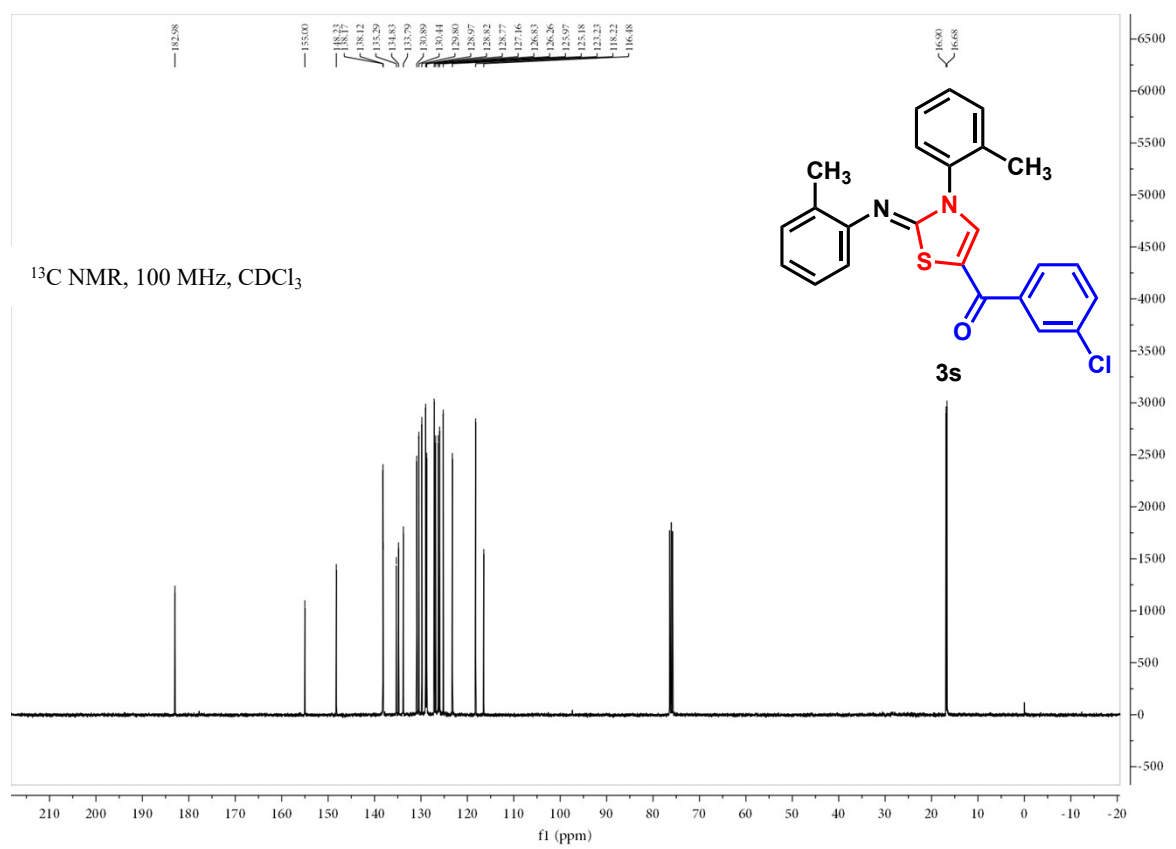

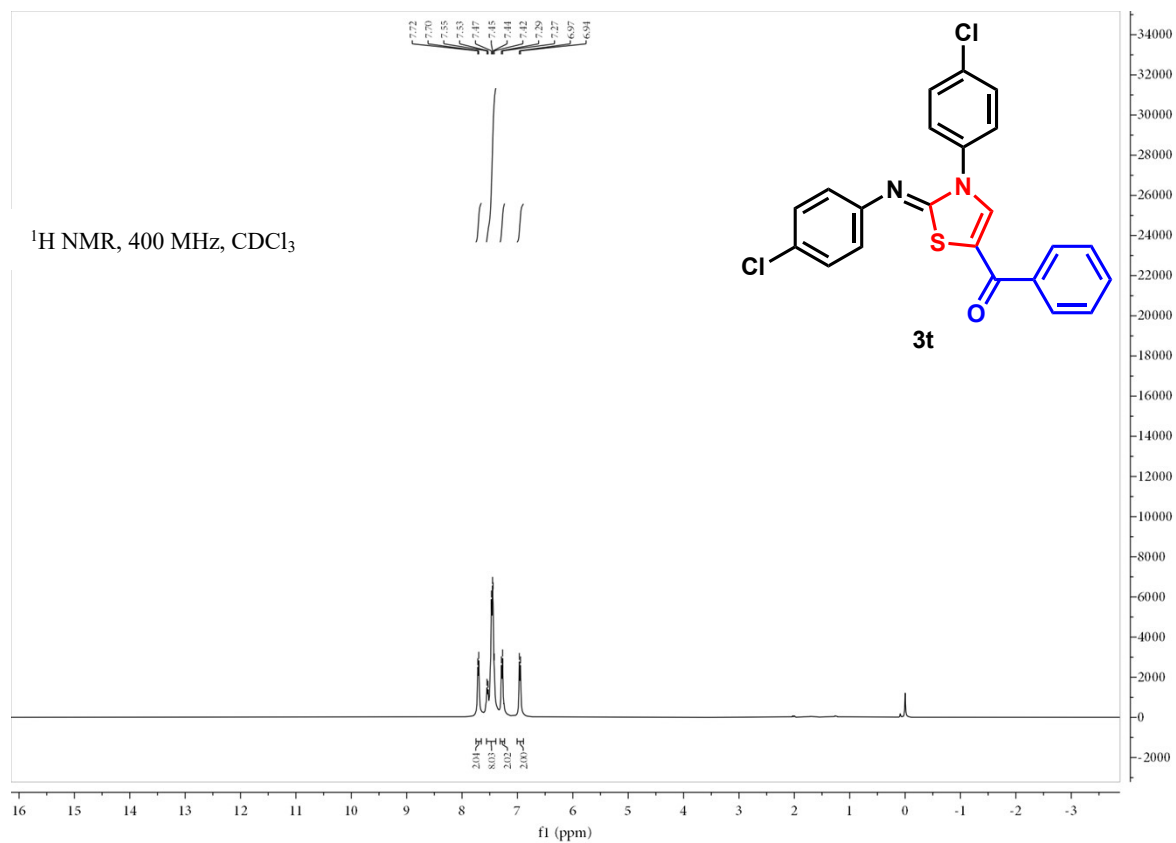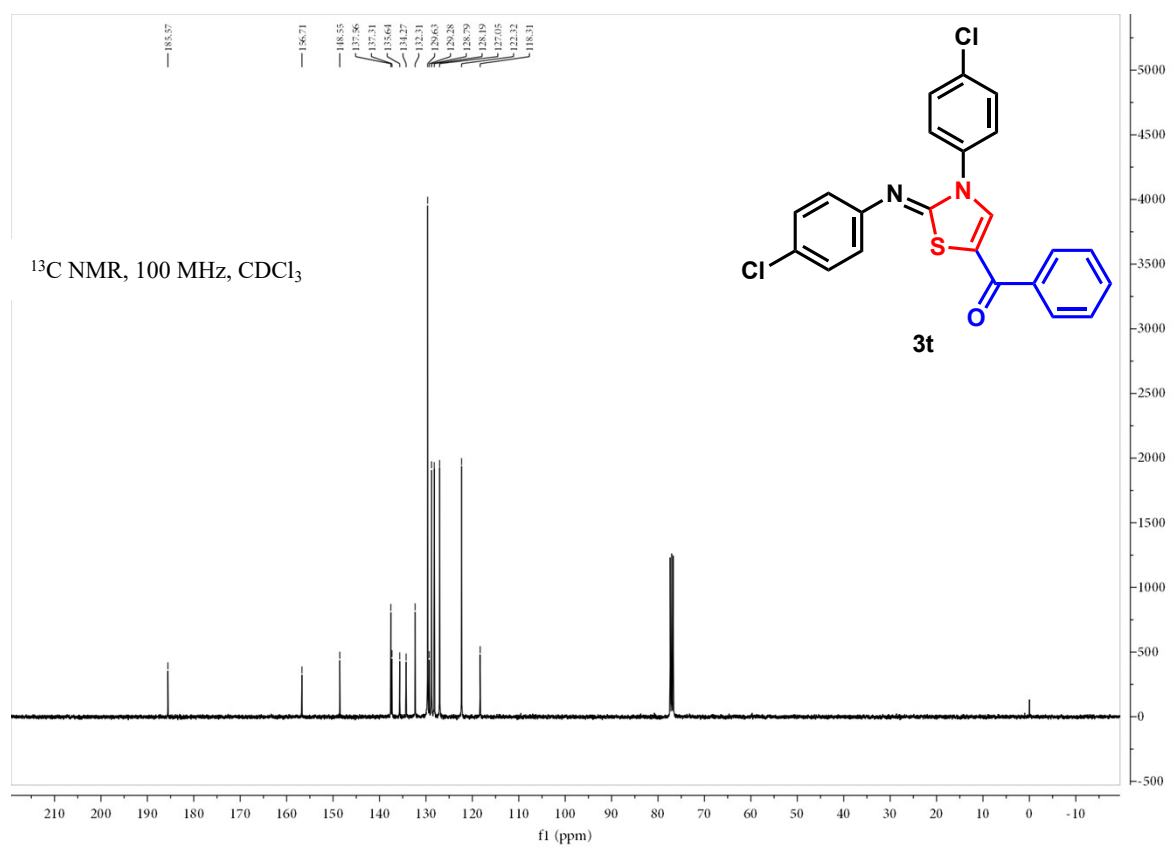

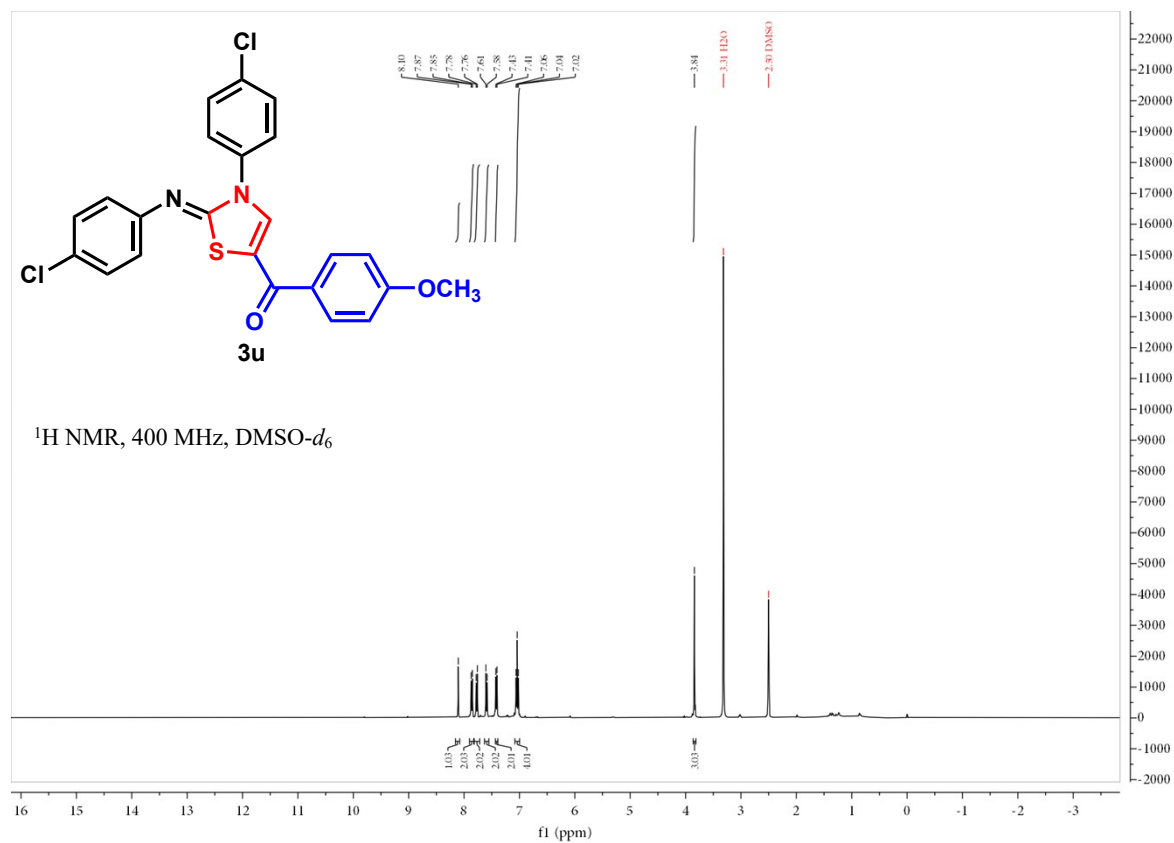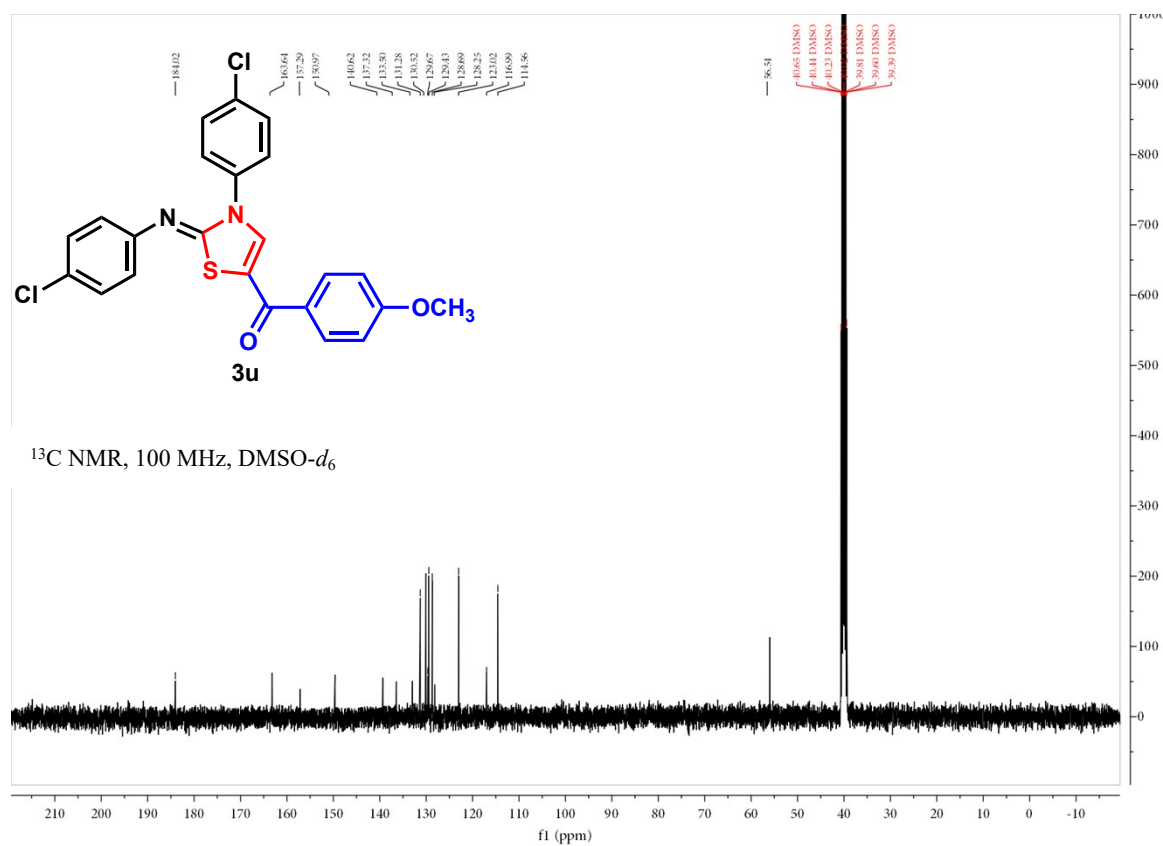



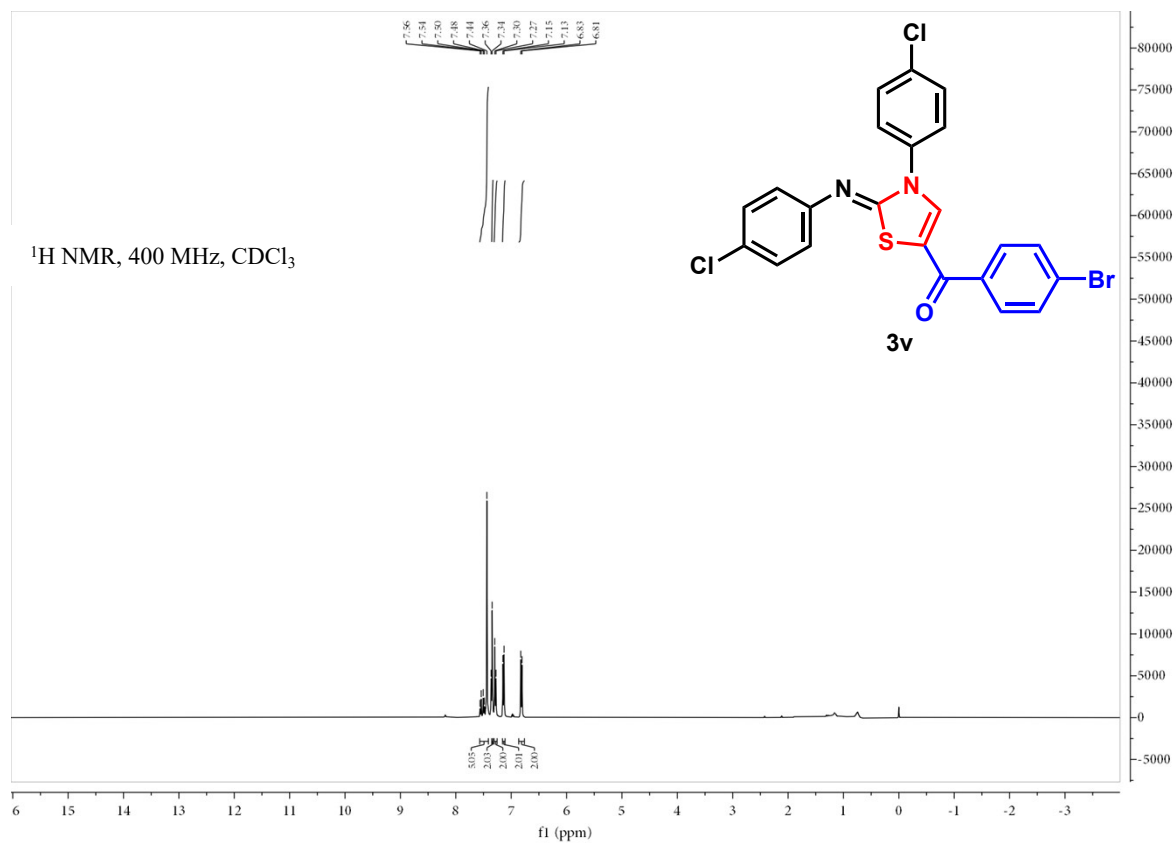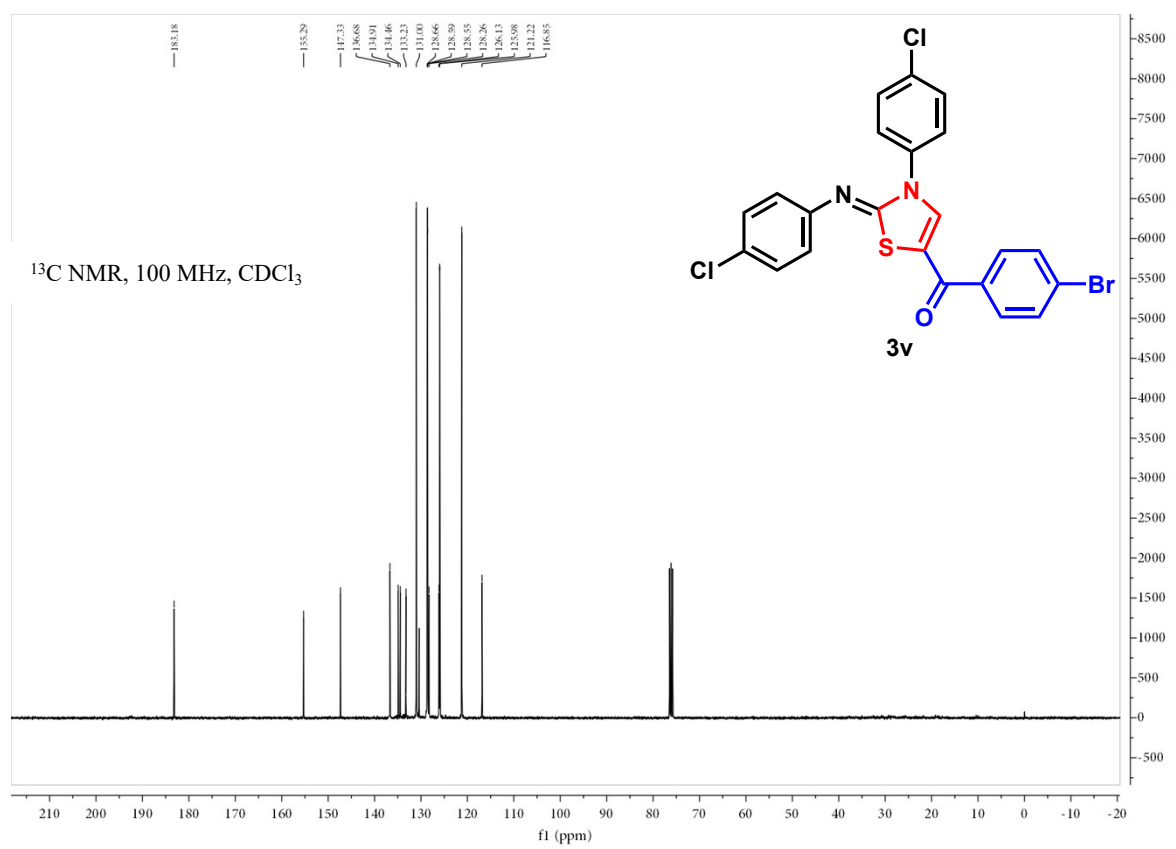

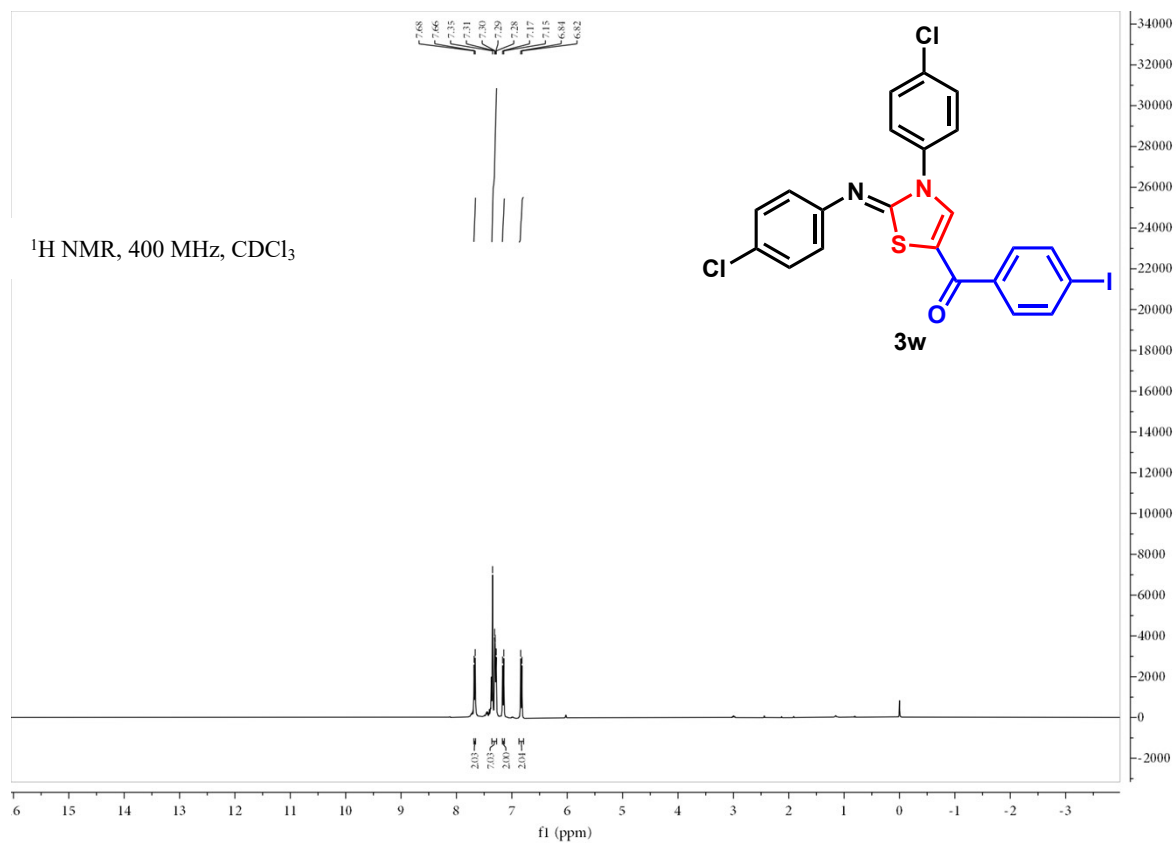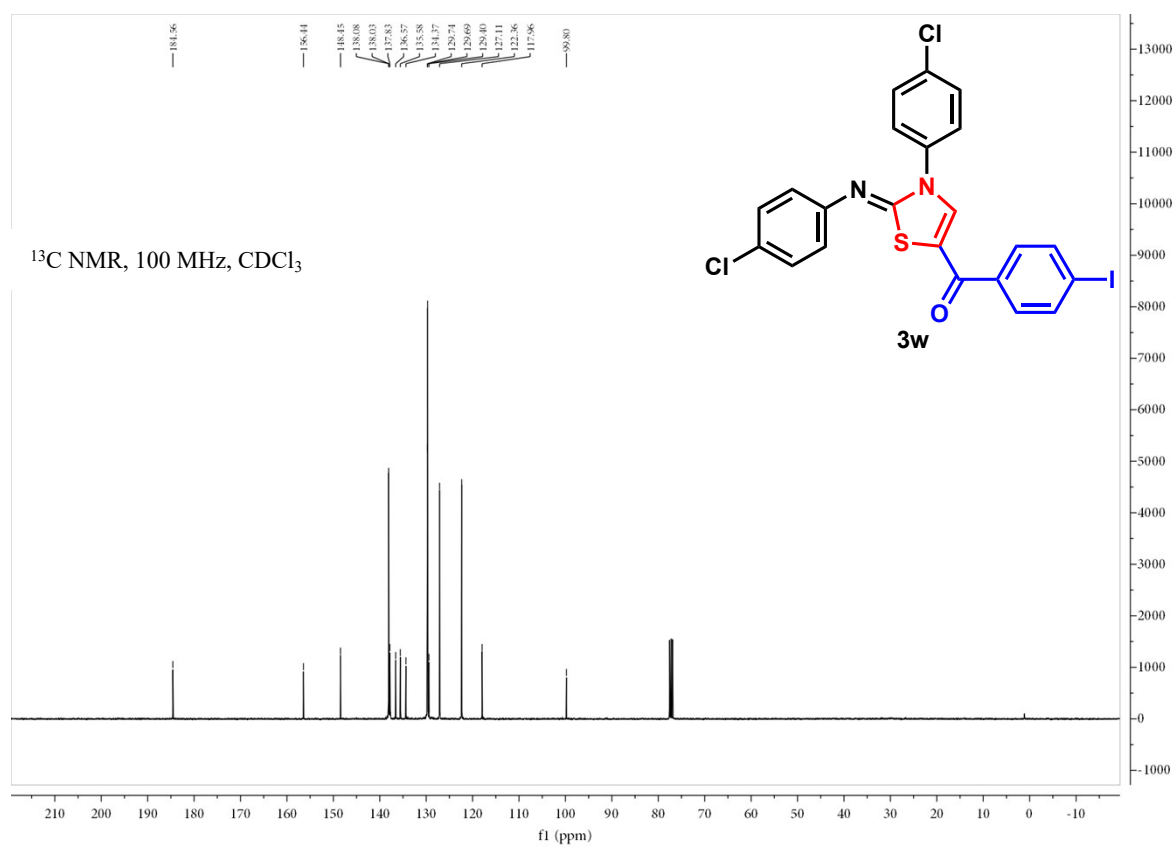

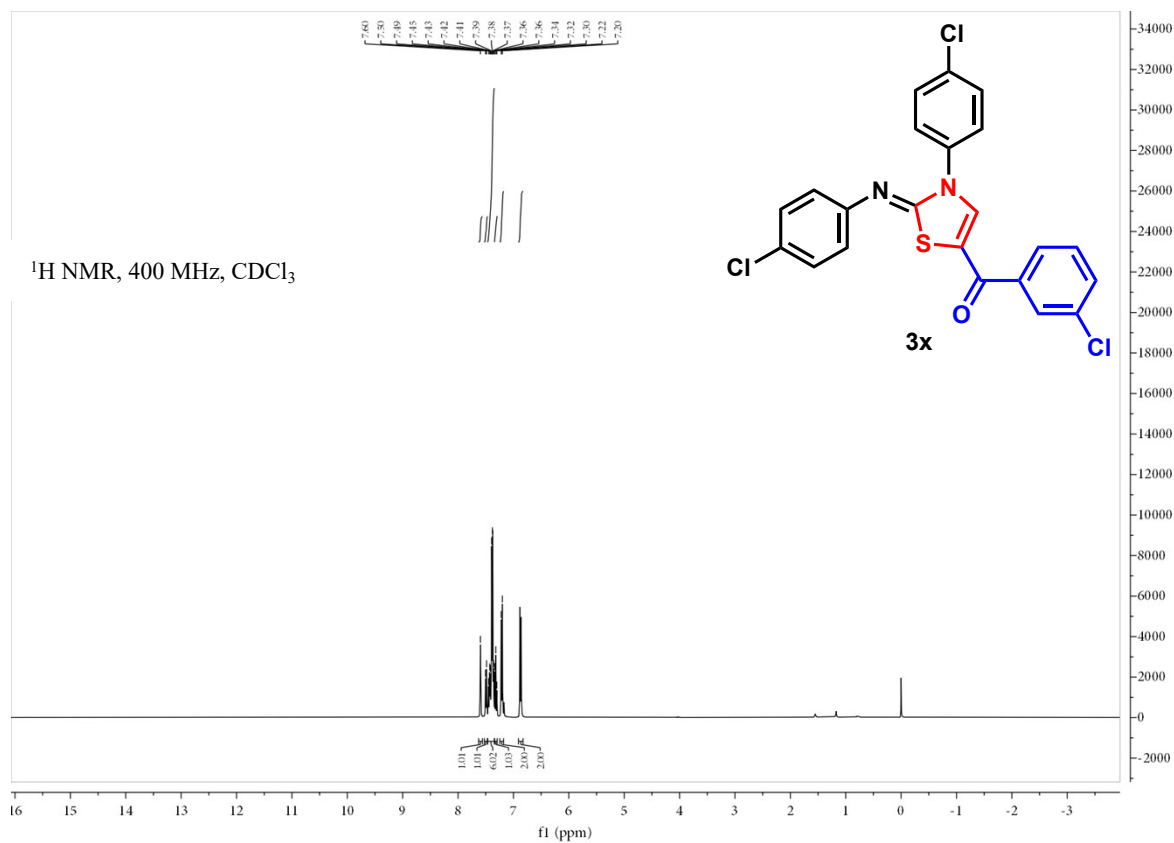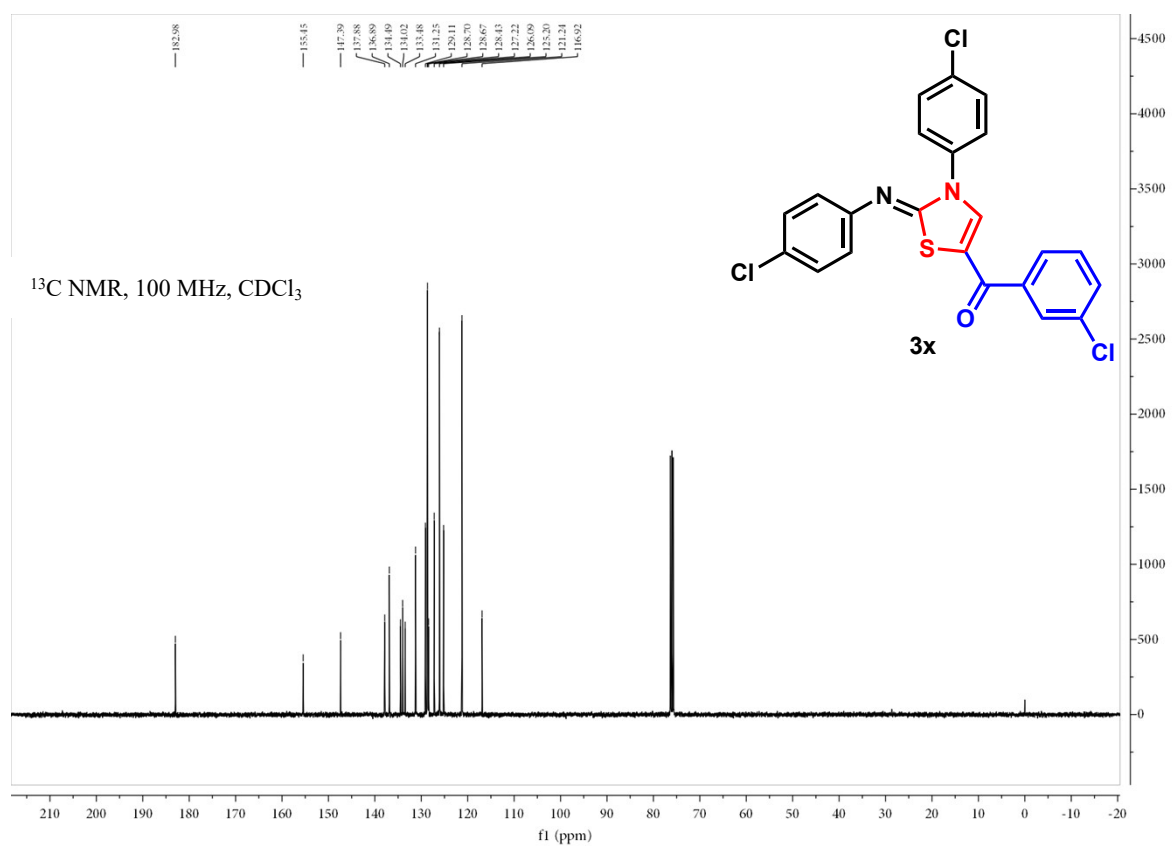

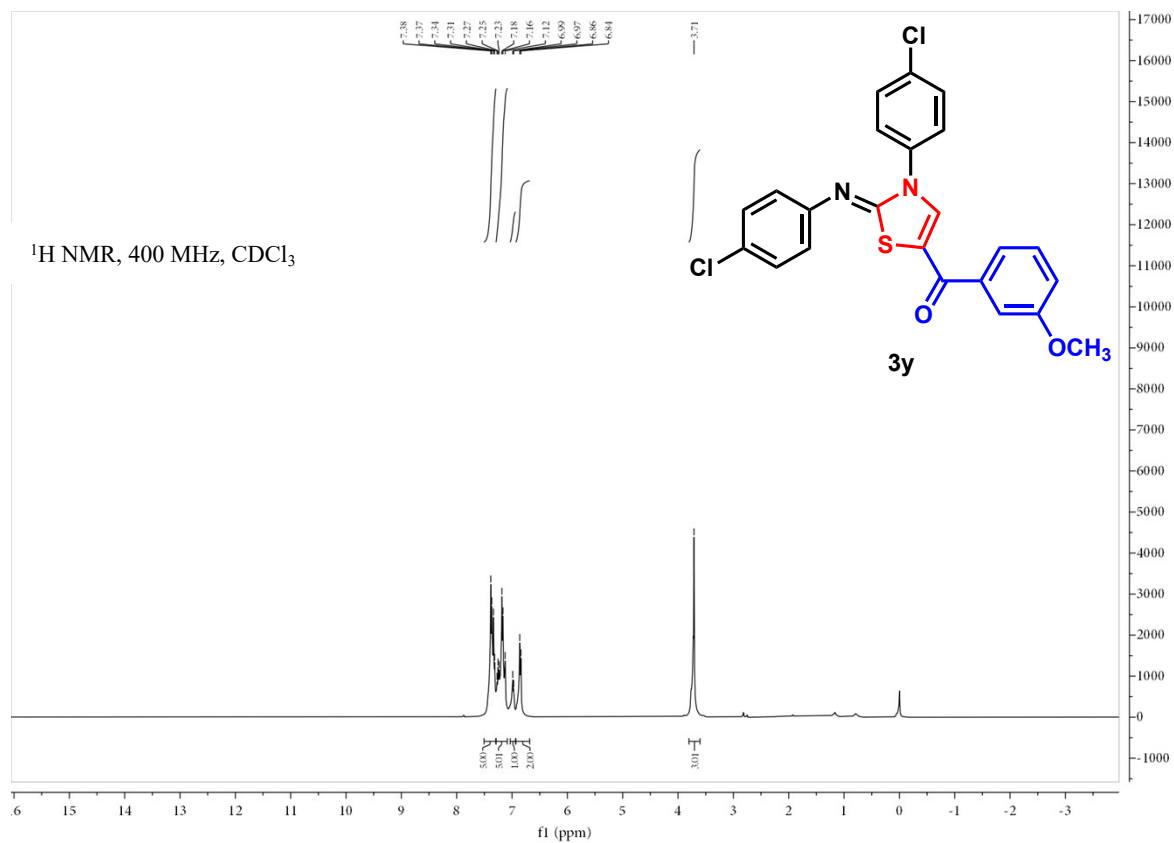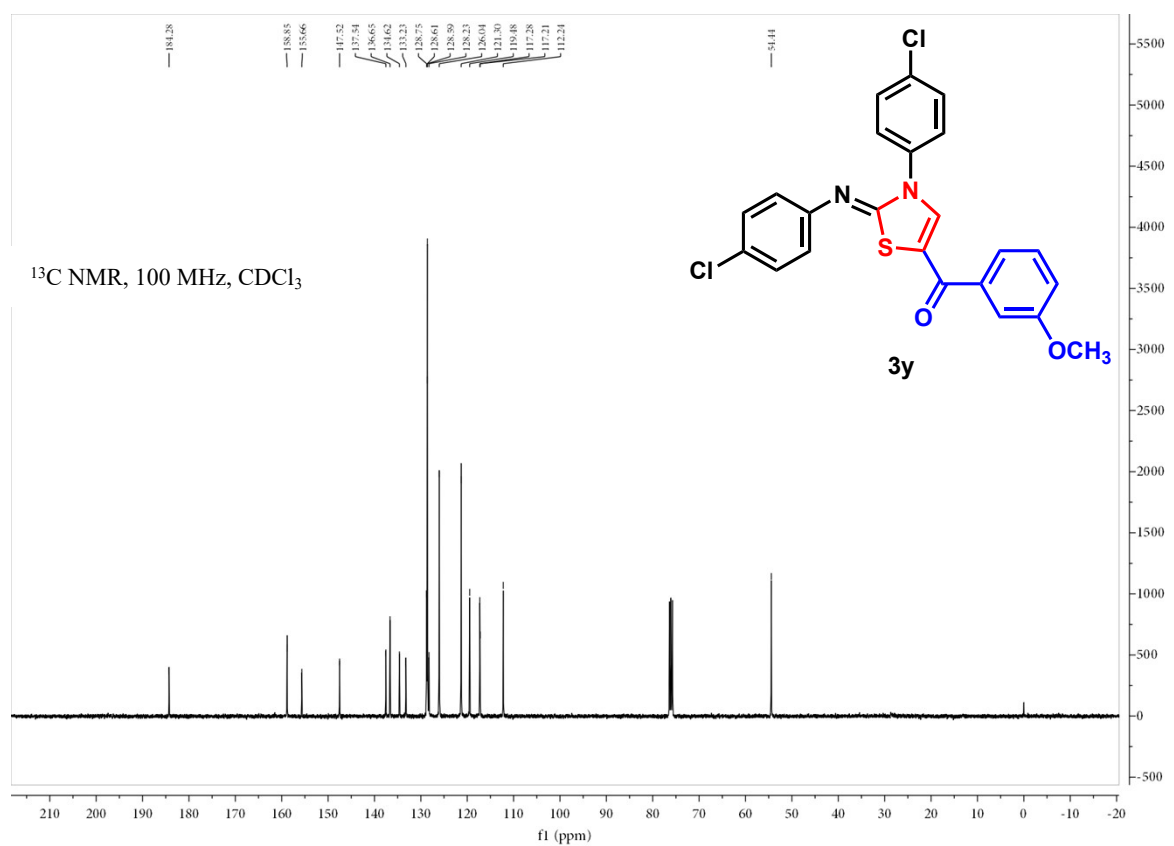

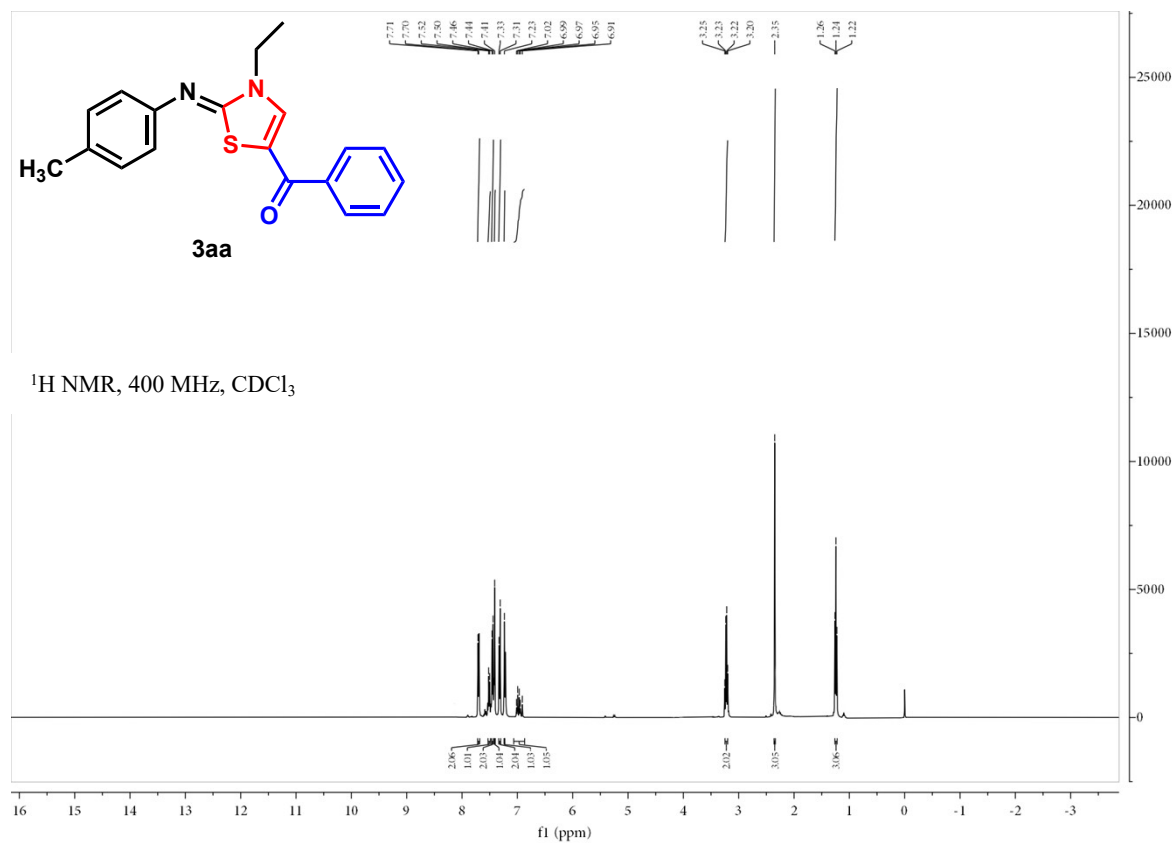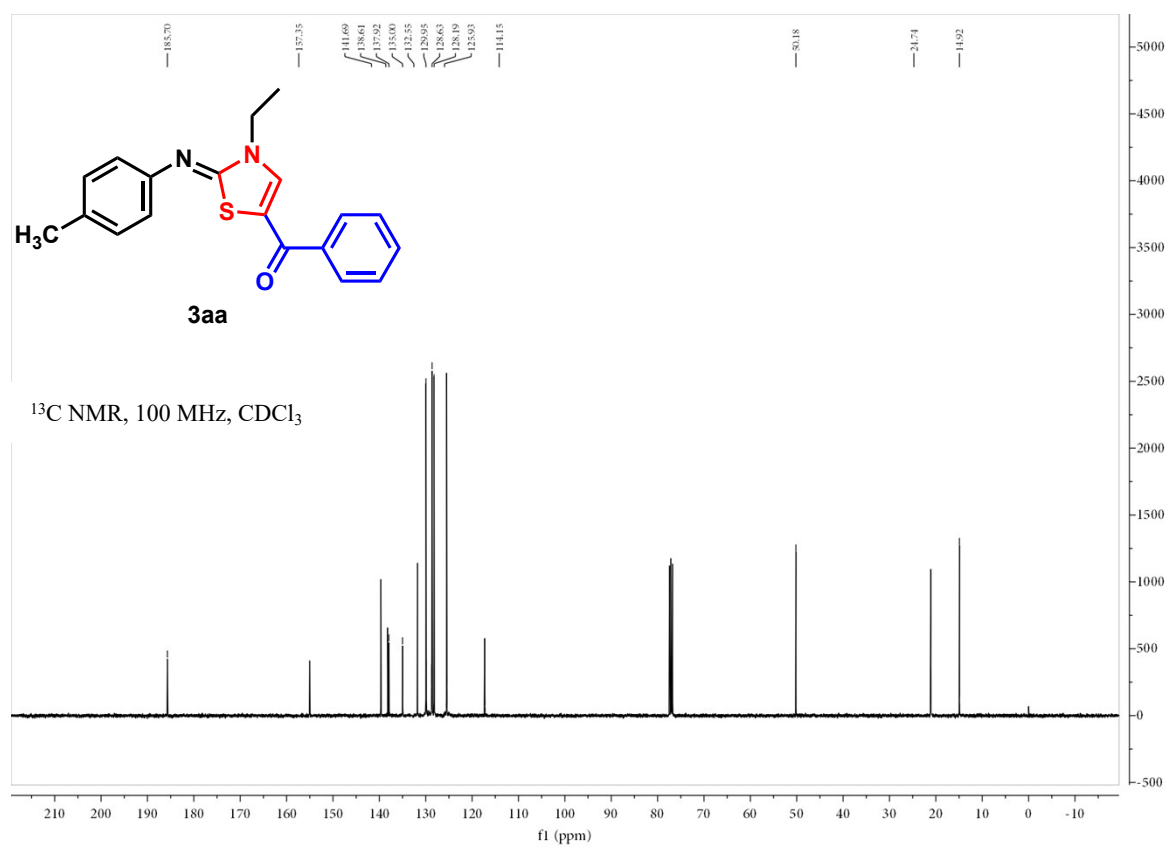

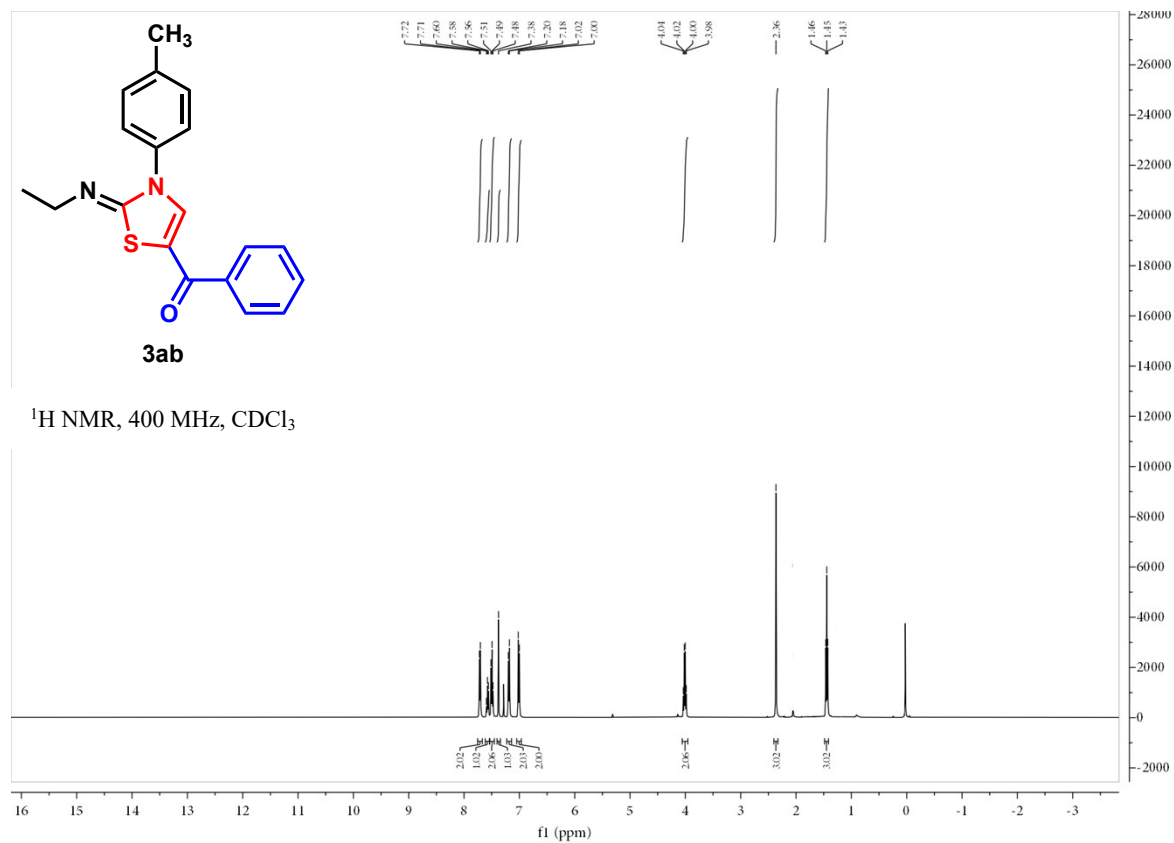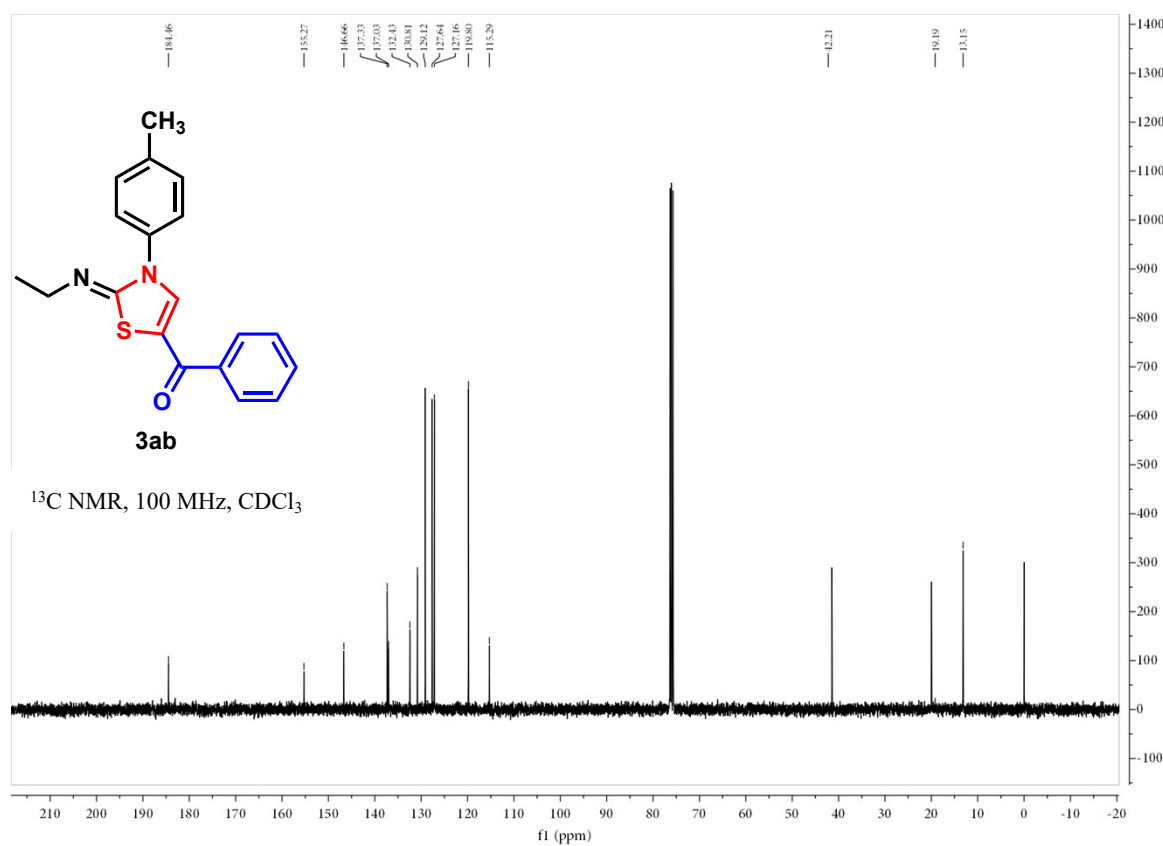

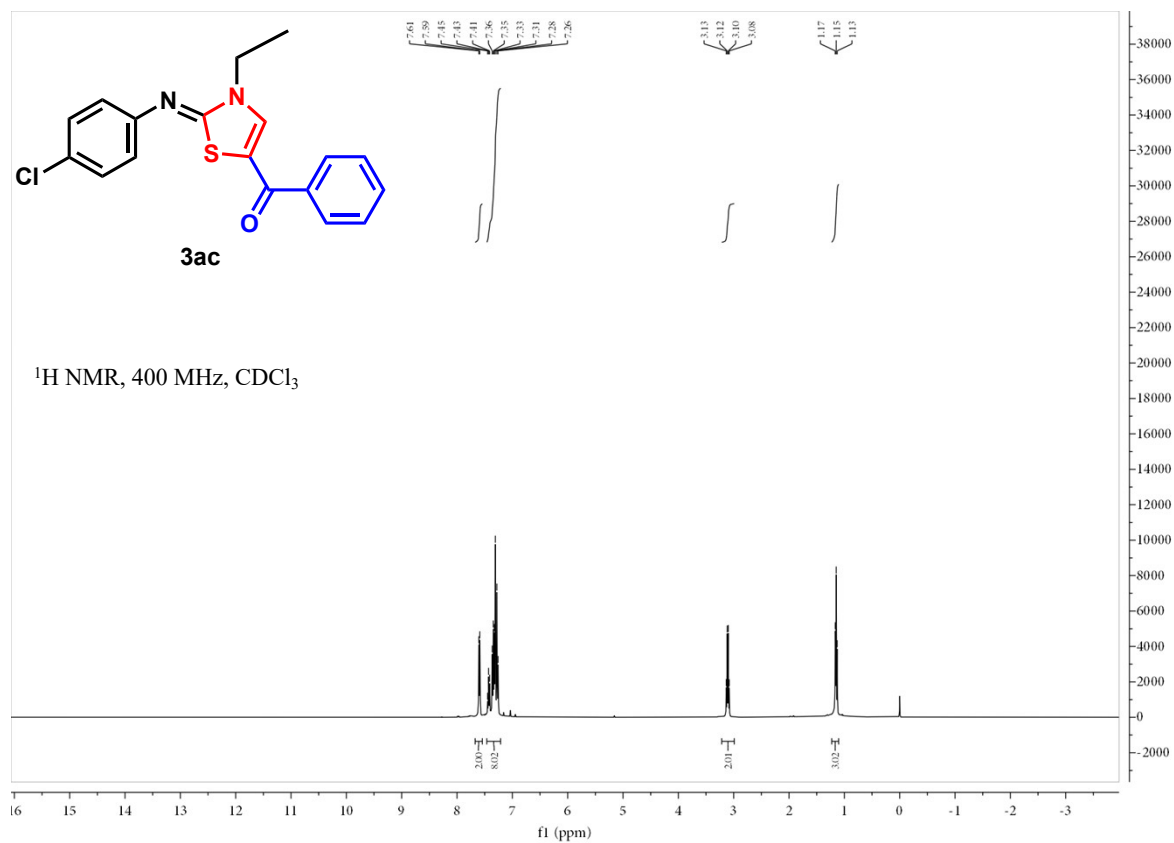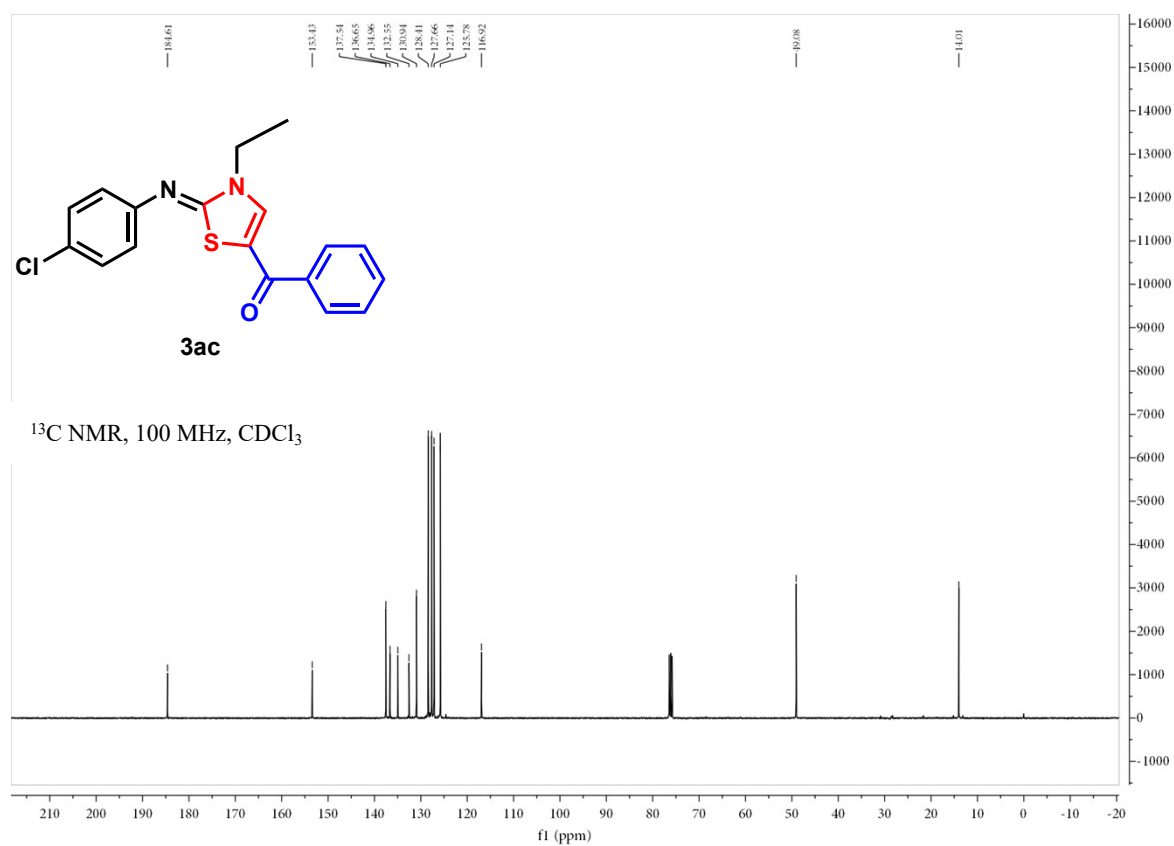

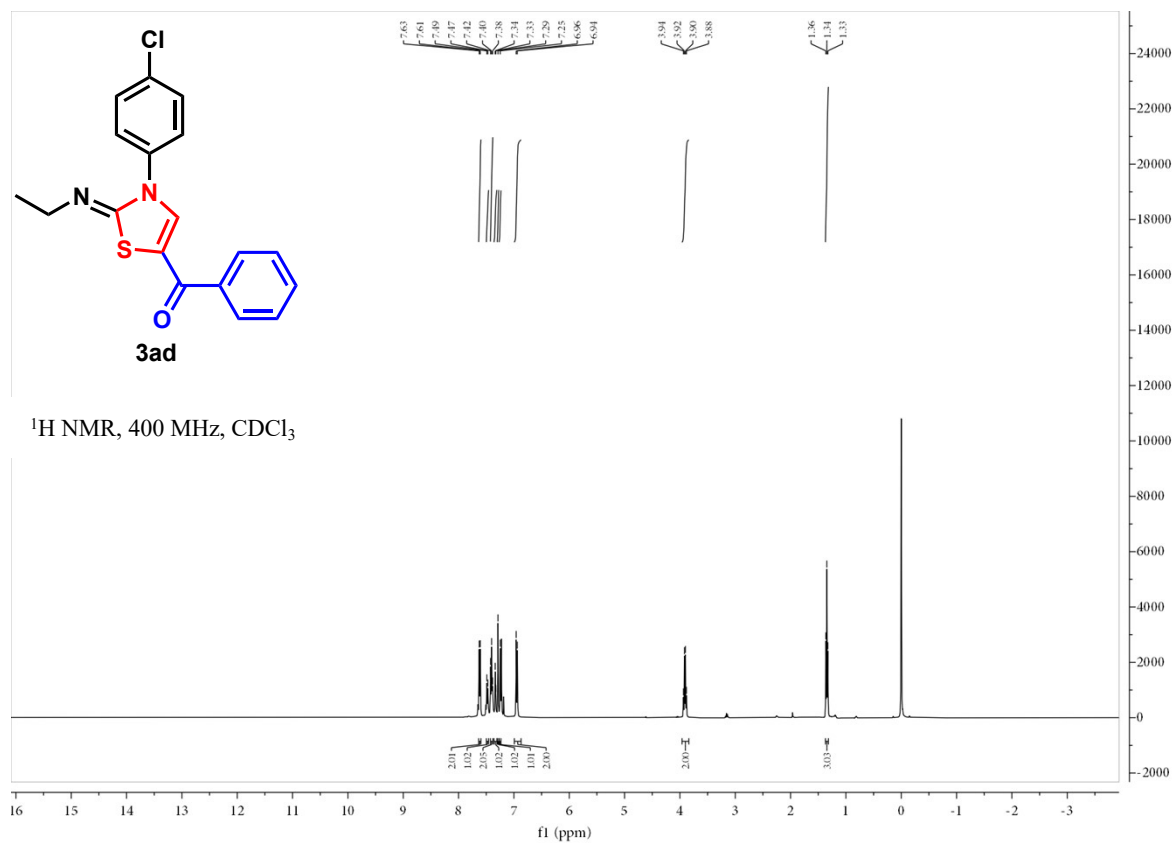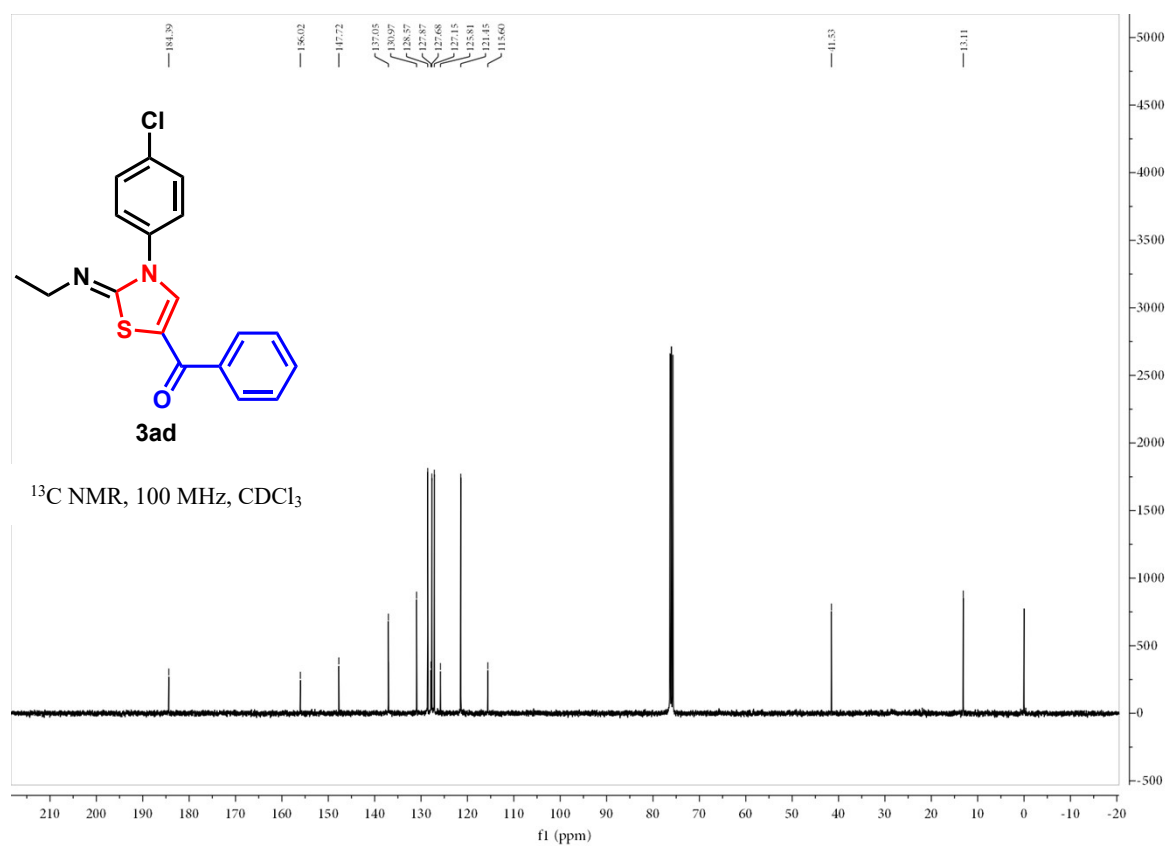



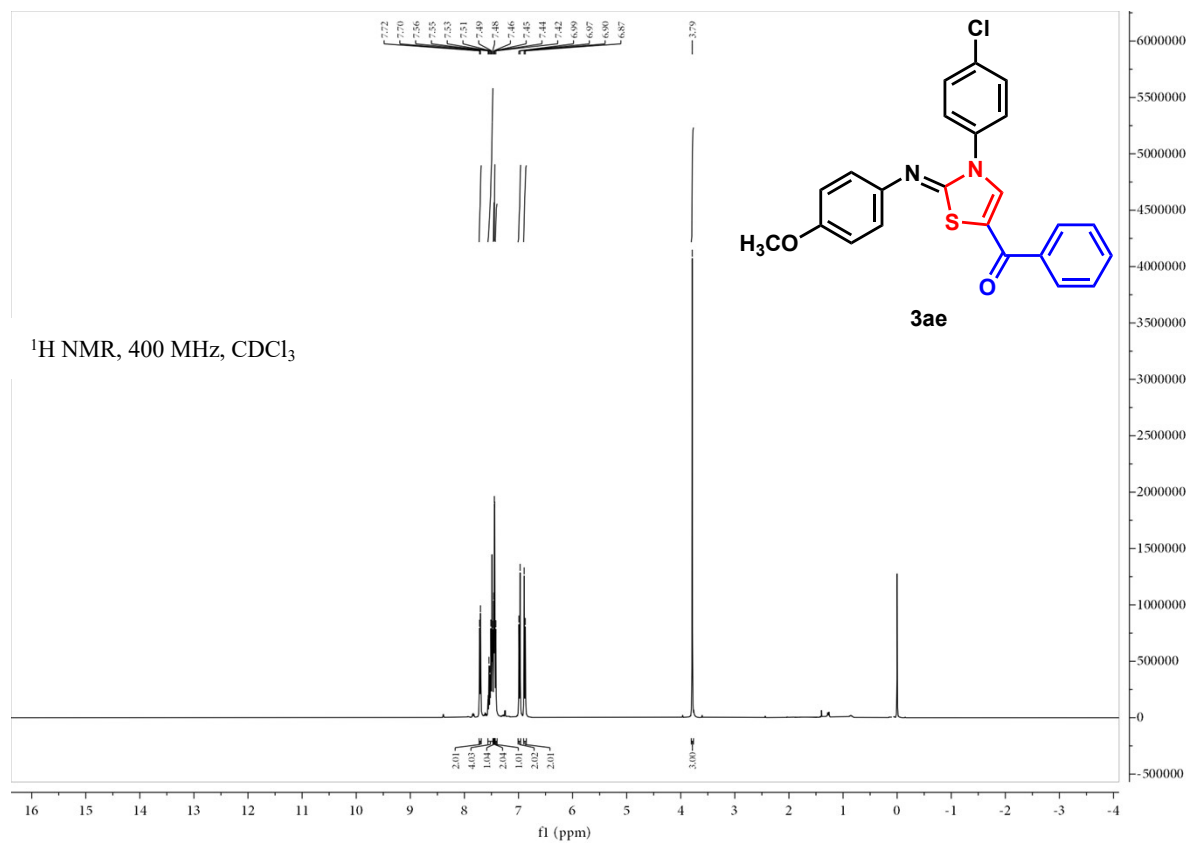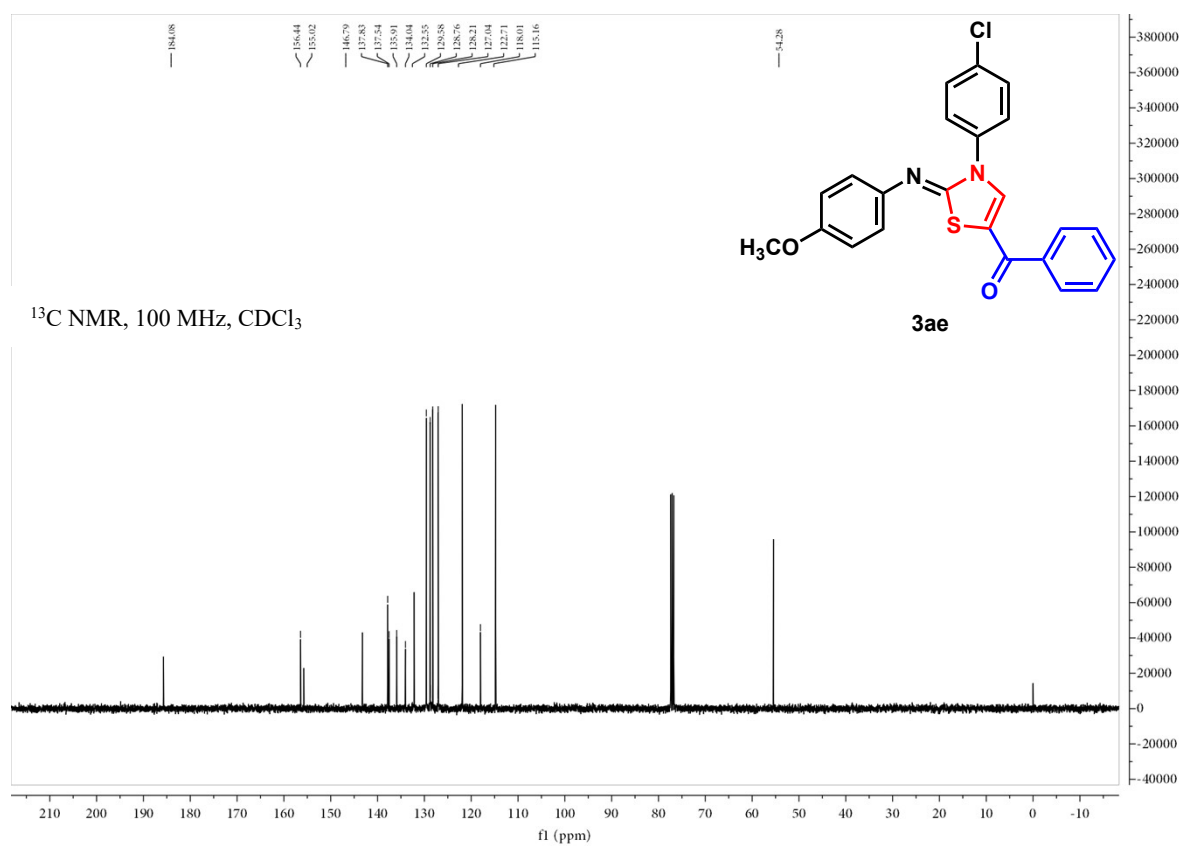

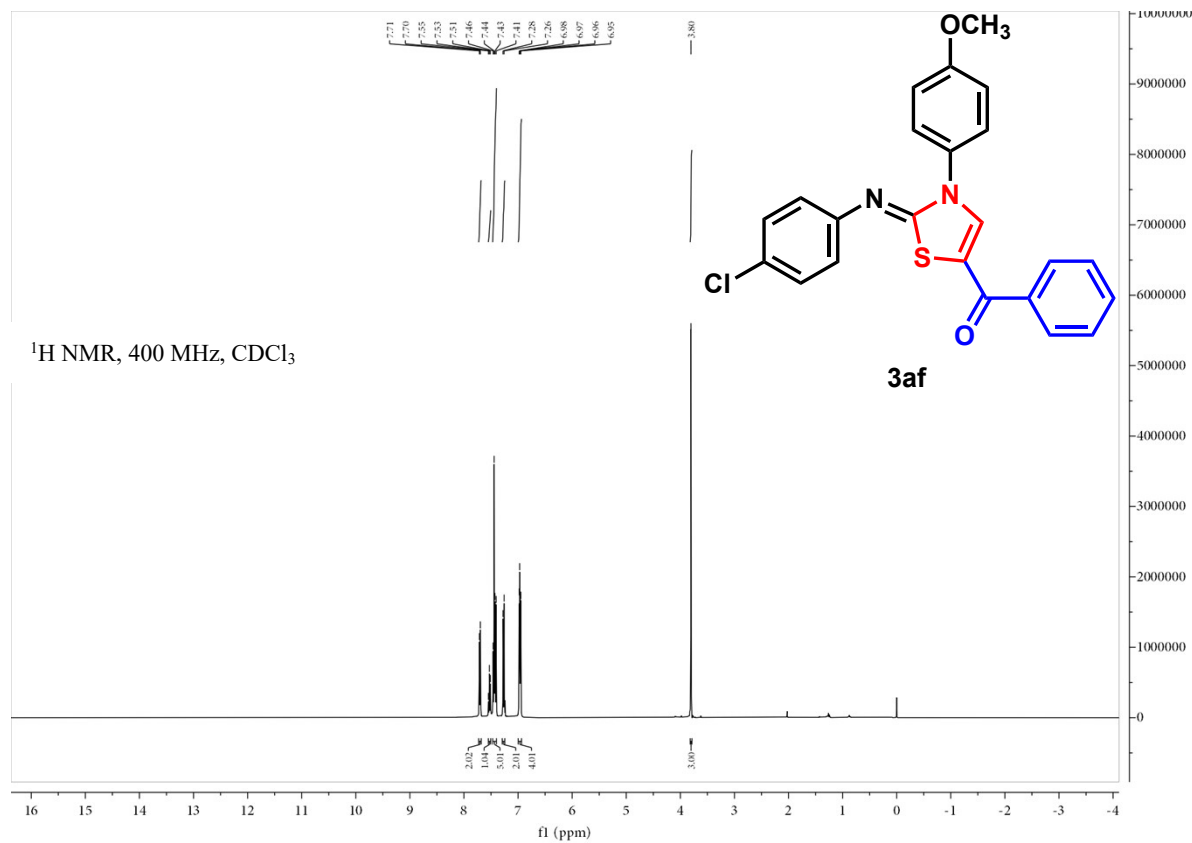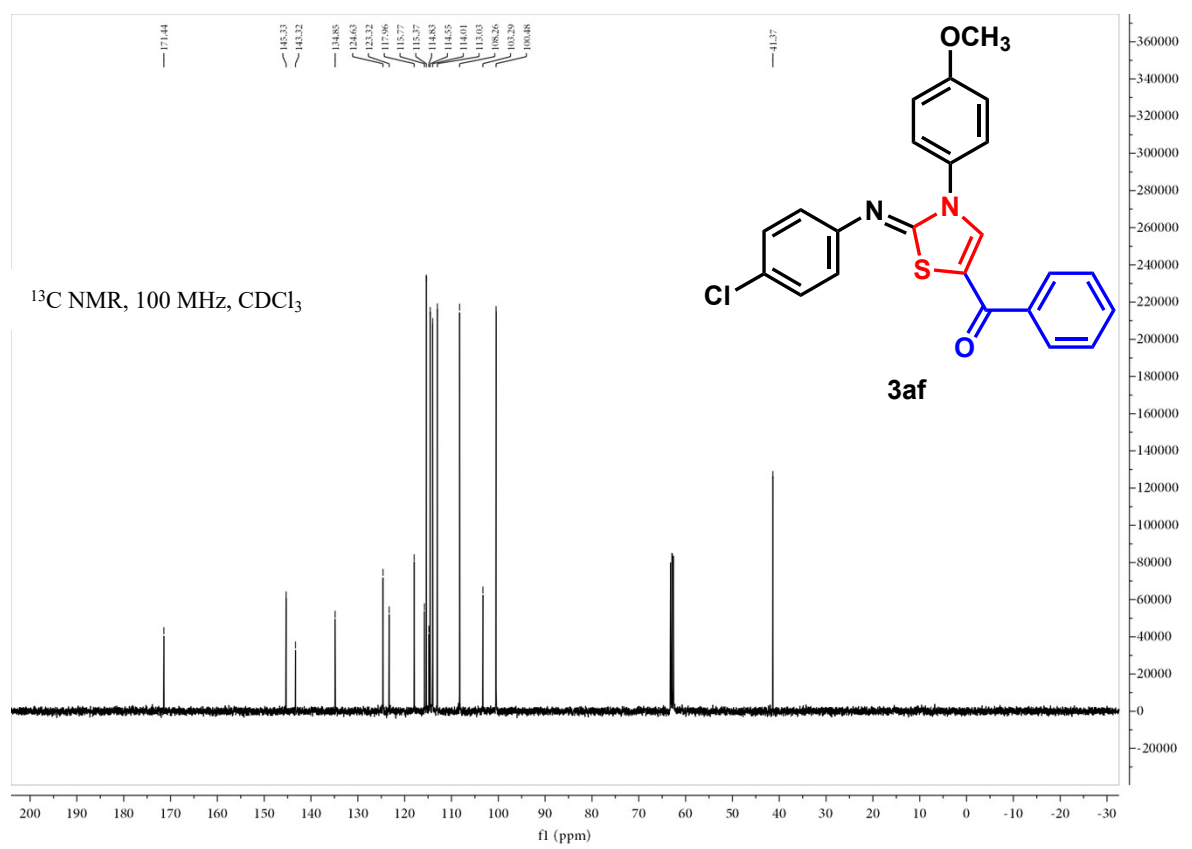

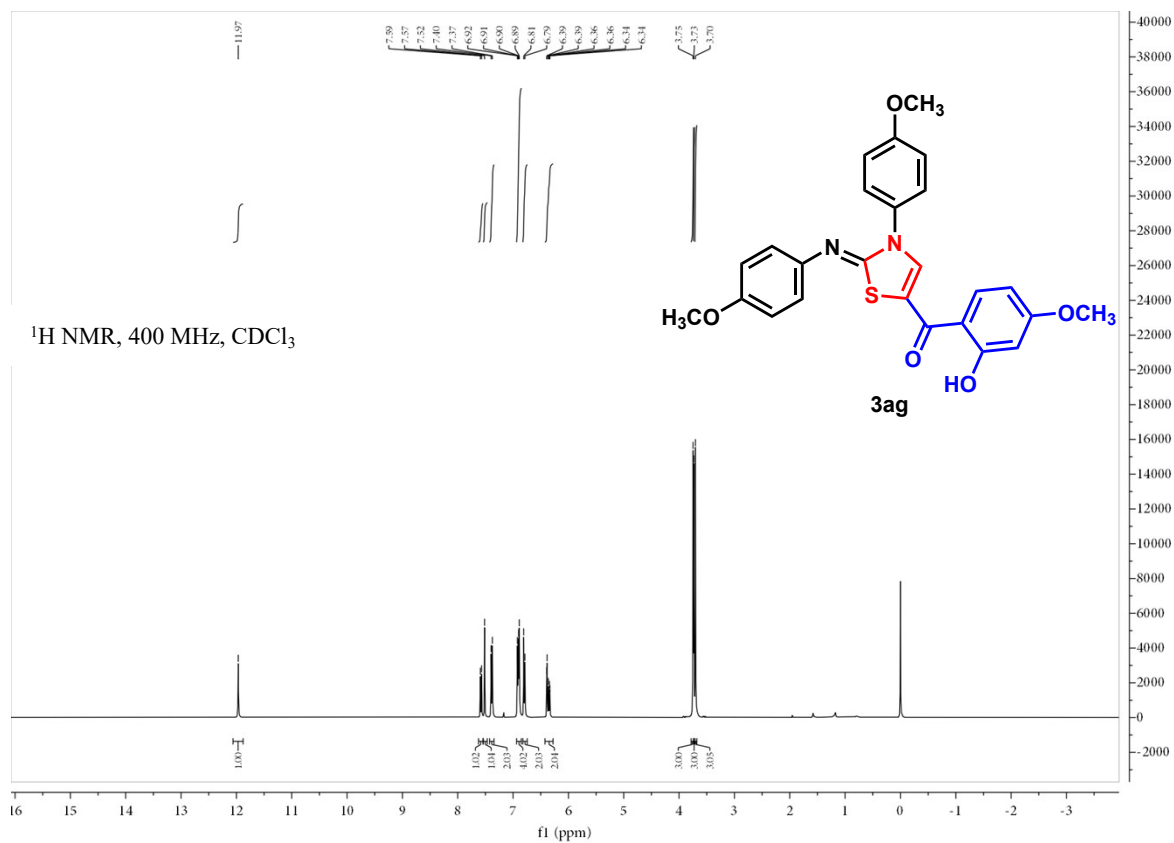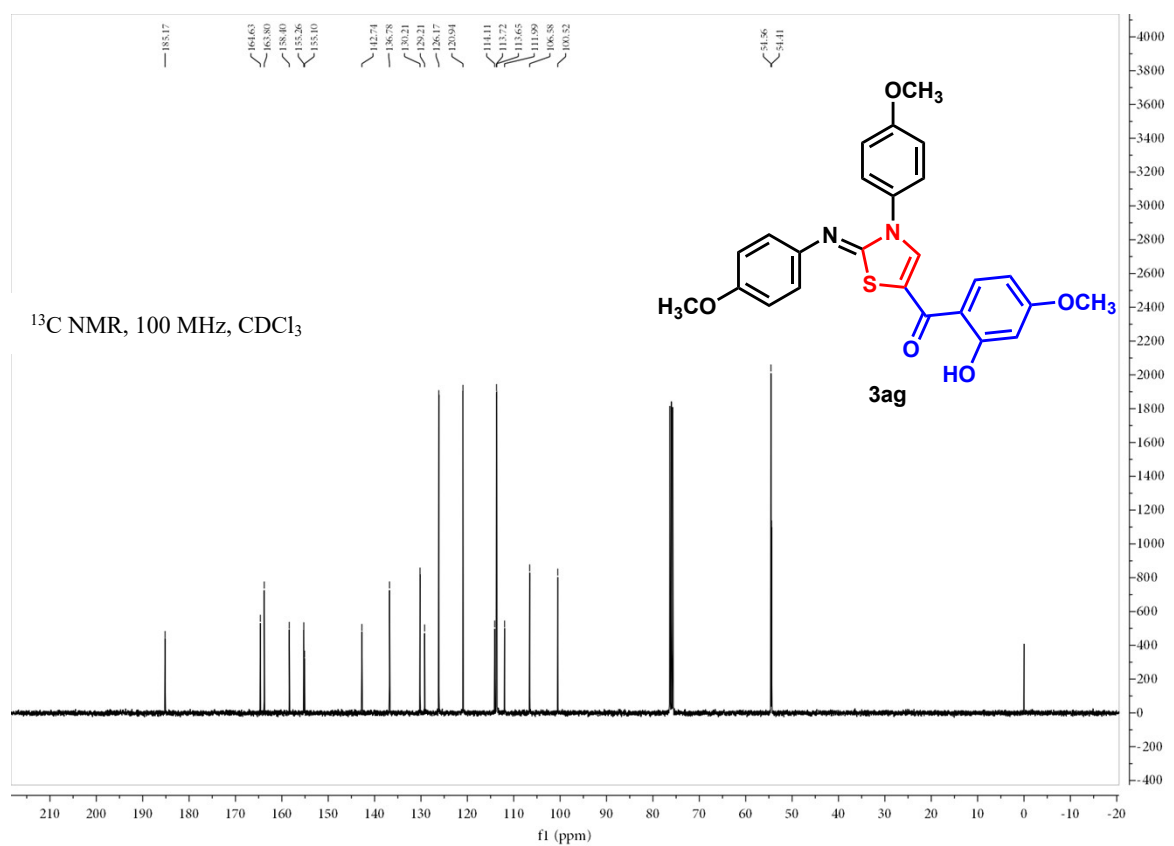

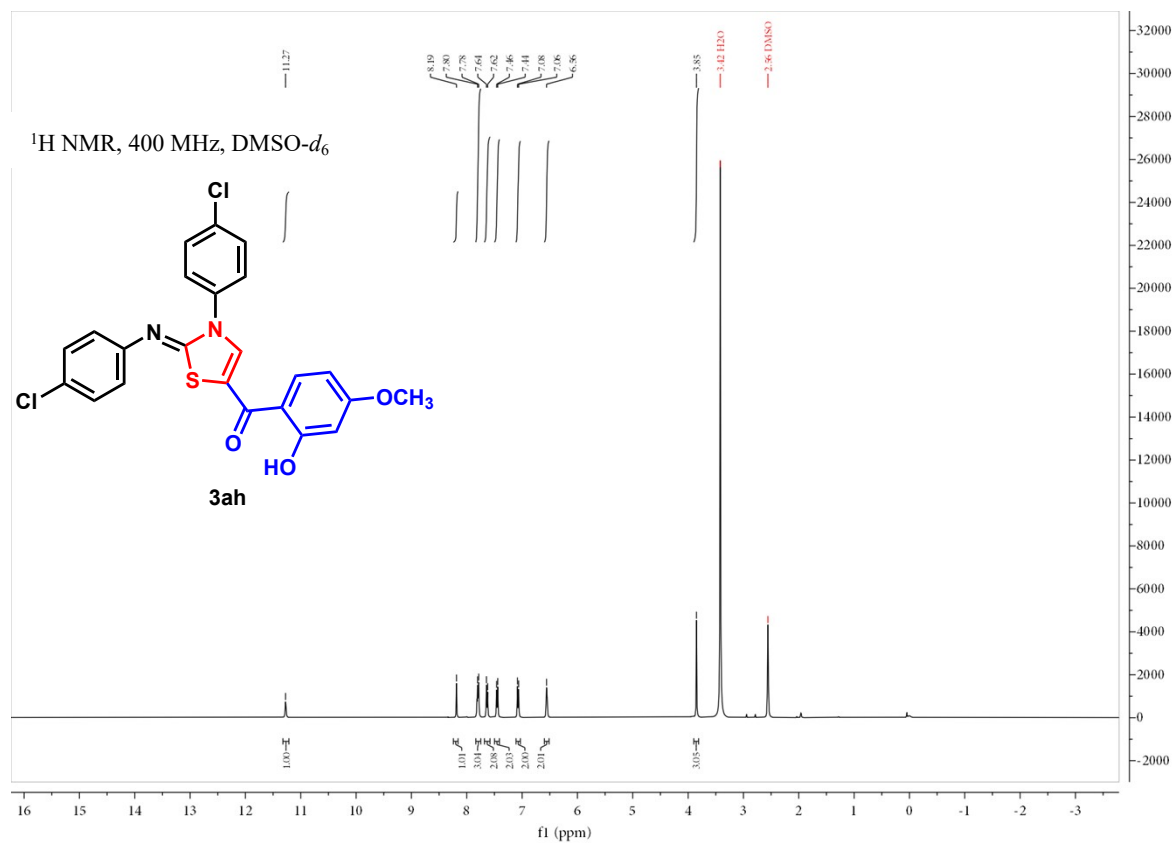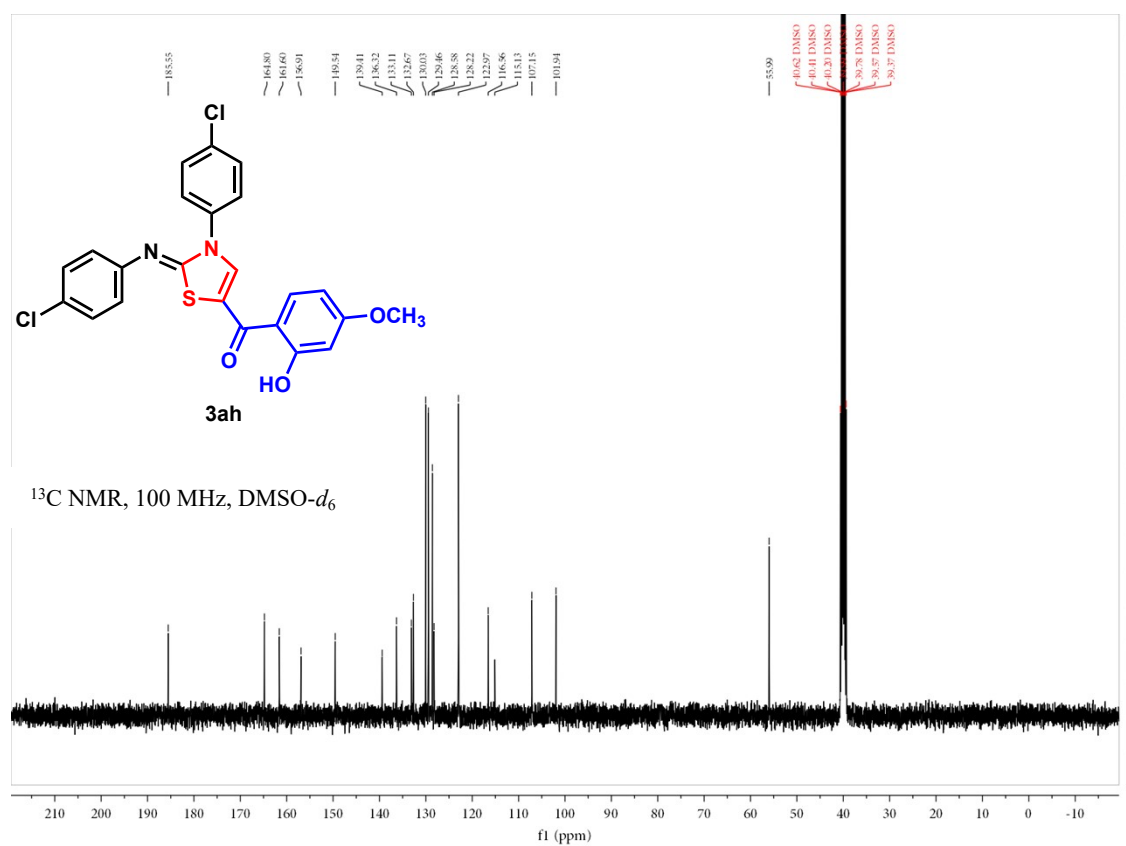

Supplement: d2ob01477g1.pdf [file d2ob01477g1.pdf]
